# Supplementary material for: A network meta-analysis of psychosocial interventions for refugees and asylum seekers with PTSD
Source: HighWire-hosted journal article supplement (doi:10.1136/bmjgh-2021-005029), 2021-06-01

## Online Supplemental Material

|                                                                                            |           |
|--------------------------------------------------------------------------------------------|-----------|
| <b>Search strategy .....</b>                                                               | <b>2</b>  |
| <b>Description of included intervention and belonging node .....</b>                       | <b>8</b>  |
| <b>Characteristics of included studies .....</b>                                           | <b>11</b> |
| <b>Risk of bias of included studies .....</b>                                              | <b>26</b> |
| <b>PRISMA NMA checklist.....</b>                                                           | <b>38</b> |
| <b>Primary outcome: PTSD symptoms .....</b>                                                | <b>41</b> |
| <b>Secondary outcome: depressive symptoms .....</b>                                        | <b>49</b> |
| <b>Secondary outcome: anxiety symptoms.....</b>                                            | <b>53</b> |
| <b>Secondary outcome: functioning.....</b>                                                 | <b>57</b> |
| <b>Secondary outcome: wellbeing/quality of life .....</b>                                  | <b>59</b> |
| <b>Secondary outcome: acceptability .....</b>                                              | <b>63</b> |
| <b>Sensitivity analysis: excluding trials with a high risk of bias.....</b>                | <b>69</b> |
| <b>Sensitivity analysis: excluding studies with PTSD probable diagnosis .....</b>          | <b>74</b> |
| <b>Subgroup analysis: by country income (HICs vs LMICs).....</b>                           | <b>78</b> |
| <b>Subgroup analysis: by level of intervention (individual vs. group intervention)....</b> | <b>86</b> |
| <b>Transitivity assessment .....</b>                                                       | <b>93</b> |

## Search strategy

### PUBMED

- #10 Search (#4 and #7 and #9)
- #9 Search (((randomized controlled trial[pt]) OR (controlled clinical trial[pt]) OR (randomized[tiab]) OR (randomly[tiab]) OR (trial[tiab]) OR (groups[tiab])) NOT (animals[mh] NOT humans[mh]))
- #8 Search (#5 or #6)
- #7 Search (abreaction[Title/Abstract] OR "acceptance[Title/Abstract] AND commitment therapy"[Title/Abstract] OR "acting out"[Title/Abstract] OR adlerian[Title/Abstract] OR "analytical psychotherapy"[Title/Abstract] OR "analytical psychotherapies"[Title/Abstract] OR "anger control"[Title/Abstract] OR "anger management"[Title/Abstract] OR "animal therapy"[Title/Abstract] OR "animal therapies"[Title/Abstract] OR "art therapy"[Title/Abstract] OR "art therapies"[Title/Abstract] OR "assertive training"[Title/Abstract] OR "assertiveness training"[Title/Abstract] OR "attention training technique"[Title/Abstract] OR "autogenic training"[Title/Abstract] OR autosuggestion[Title/Abstract] OR "aversion therapy"[Title/Abstract] OR "aversion therapies"[Title/Abstract] OR "balint group"[Title/Abstract] OR befriending[Title/Abstract] OR "behavior contracting"[Title/Abstract] OR "behavior modification"[Title/Abstract] OR "behavior regulation"[Title/Abstract] OR "behavior therapy"[Title/Abstract] OR "behavior therapies"[Title/Abstract] OR "behaviour contracting"[Title/Abstract] OR "behaviour modification"[Title/Abstract] OR "behaviour regulation"[Title/Abstract] OR "behaviour therapy"[Title/Abstract] OR "behaviour therapies"[Title/Abstract] OR bibliotherapy[Title/Abstract] OR bibliotherapies[Title/Abstract] OR biofeedback[Title/Abstract] OR "body psychotherapy"[Title/Abstract] OR "body psychotherapies"[Title/Abstract] OR "brief psychotherapy"[Title/Abstract] OR "brief psychotherapies"[Title/Abstract] OR "caregiver support"[Title/Abstract] OR cbt[Title/Abstract] OR "client centre"[Title/Abstract] OR "client center"[Title/Abstract] OR "cognitive behavior"[Title/Abstract] OR "cognitive behavioral"[Title/Abstract] OR "cognitive intervention"[Title/Abstract] OR "cognitive interventions"[Title/Abstract] OR "cognitive rehabilitation"[Title/Abstract] OR "cognitive remediation"[Title/Abstract] OR "cognitive technique"[Title/Abstract] OR "cognitive techniques"[Title/Abstract] OR "cognitive therapy"[Title/Abstract] OR "cognitive therapies"[Title/Abstract] OR "cognitive treatment"[Title/Abstract] OR "cognitive treatments"[Title/Abstract] OR "color therapy"[Title/Abstract] OR "color therapies"[Title/Abstract] OR "colour therapy"[Title/Abstract] OR "colour therapies"[Title/Abstract] OR "compassionate mind training"[Title/Abstract] OR "conjoint therapy"[Title/Abstract] OR "conjoint therapies"[Title/Abstract] OR "contingency management"[Title/Abstract] OR "conversational therapy"[Title/Abstract] OR "conversational therapies"[Title/Abstract] OR "conversion therapy"[Title/Abstract] OR "conversion therapies"[Title/Abstract] OR "coping skills"[Title/Abstract] OR counseling[Title/Abstract] OR counselling[Title/Abstract] OR countertransference[Title/Abstract] OR "couples therapy"[Title/Abstract] OR "couples therapies"[Title/Abstract] OR "covert sensitization"[Title/Abstract] OR "covert sensitisation"[Title/Abstract] OR "crisis intervention"[Title/Abstract] OR "dance therapy"[Title/Abstract] OR "dance therapies"[Title/Abstract] OR dialectic[Title/Abstract] OR dialectical[Title/Abstract] OR "dream analysis"[Title/Abstract] OR eclectic[Title/Abstract] OR "emotion focused"[Title/Abstract] OR "emotionally focused"[Title/Abstract] OR "emotional freedom technique"[Title/Abstract] OR "encounter group therapy"[Title/Abstract] OR "encounter group therapies"[Title/Abstract] OR "existential therapy"[Title/Abstract] OR "existential therapies"[Title/Abstract] OR "experiential

psychotherapy"[Title/Abstract] OR "experiential psychotherapies"[Title/Abstract] OR "exposure therapy"[Title/Abstract] OR "exposure therapies"[Title/Abstract] OR "expressive psychotherapy"[Title/Abstract] OR "expressive psychotherapies"[Title/Abstract] OR "eye movement desensitization"[Title/Abstract] OR "eye movement desensitisation"[Title/Abstract] OR "family intervention"[Title/Abstract] OR "family interventions"[Title/Abstract] OR "family therapy"[Title/Abstract] OR "family therapies"[Title/Abstract] OR "feminist therapy"[Title/Abstract] OR "feminist therapies"[Title/Abstract] OR "free association"[Title/Abstract] OR freudian[Title/Abstract] OR "geriatric psychotherapy"[Title/Abstract] OR "geriatric psychotherapies"[Title/Abstract] OR "gestalt therapy"[Title/Abstract] OR "gestalt therapies"[Title/Abstract] OR griefwork[Title/Abstract] OR "group intervention"[Title/Abstract] OR "group interventions"[Title/Abstract] OR "group psychotherapy"[Title/Abstract] OR "group psychotherapies"[Title/Abstract] OR "group therapy"[Title/Abstract] OR "group therapies"[Title/Abstract] OR "guided imagery"[Title/Abstract] OR "holistic psychotherapy"[Title/Abstract] OR "holistic psychotherapies"[Title/Abstract] OR "humanistic psychotherapy"[Title/Abstract] OR "humanistic psychotherapies"[Title/Abstract] OR hypnosis[Title/Abstract] OR hypnotherapy[Title/Abstract] OR hypnotherapies[Title/Abstract] OR hypnotizability[Title/Abstract] OR hypnotisability[Title/Abstract] OR imagery[Title/Abstract] OR "implosive therapy"[Title/Abstract] OR "implosive therapies"[Title/Abstract] OR "individual psychotherapy"[Title/Abstract] OR "individual psychotherapies"[Title/Abstract] OR "insight therapy"[Title/Abstract] OR "insight therapies"[Title/Abstract] OR "integrated psychological therapy"[Title/Abstract] OR "integrative psychotherapy"[Title/Abstract] OR "integrative psychotherapies"[Title/Abstract] OR "integrative therapy"[Title/Abstract] OR "integrative therapies"[Title/Abstract] OR interpersonal[Title/Abstract] OR jungian[Title/Abstract] OR kleinian[Title/Abstract] OR logotherapy[Title/Abstract] OR logotherapies[Title/Abstract] OR "marathon group therapy"[Title/Abstract] OR "marathon group therapies"[Title/Abstract] OR "marital therapy"[Title/Abstract] OR "marital therapies"[Title/Abstract] OR meditation[Title/Abstract] OR "mental healing"[Title/Abstract] OR "metacognitive therapy"[Title/Abstract] OR "metacognitive therapies"[Title/Abstract] OR "metacognitive training"[Title/Abstract] OR "milieu therapy"[Title/Abstract] OR "milieu therapies"[Title/Abstract] OR mindfulness[Title/Abstract] OR "morita therapy"[Title/Abstract] OR "morita therapies"[Title/Abstract] OR multimodal[Title/Abstract] OR "music therapy"[Title/Abstract] OR "music therapies"[Title/Abstract] OR "narrative therapy"[Title/Abstract] OR "narrative therapies"[Title/Abstract] OR "nondirective therapy"[Title/Abstract] OR "nondirective therapies"[Title/Abstract] OR "object relations"[Title/Abstract] OR "person centred therapy"[Title/Abstract] OR "person centred therapies"[Title/Abstract] OR "person centered therapy"[Title/Abstract] OR "person centered therapies"[Title/Abstract] OR "personal construct therapy"[Title/Abstract] OR "personal construct therapies"[Title/Abstract] OR "persuasion therapy"[Title/Abstract] OR "persuasion therapies"[Title/Abstract] OR "pet therapy"[Title/Abstract] OR "pet therapies"[Title/Abstract] OR "play therapy"[Title/Abstract] OR "play therapies"[Title/Abstract] OR "primal therapy"[Title/Abstract] OR "primal therapies"[Title/Abstract] OR "problem solving"[Title/Abstract] OR psychoanalyse[Title/Abstract] OR psychoanalysed[Title/Abstract] OR psychoanalysis[Title/Abstract] OR psychoanalytic[Title/Abstract] OR psychodrama[Title/Abstract] OR psychodynamic[Title/Abstract] OR psychoeducate[Title/Abstract] OR psychoeducation[Title/Abstract] OR psychoeducating[Title/Abstract] OR psychologic[Title/Abstract] OR psychological[Title/Abstract] OR psychologically[Title/Abstract] OR "psychological therapy"[Title/Abstract] OR "psychological

- therapies"[Title/Abstract] OR "psychosocial treatment"[Title/Abstract] OR "psychosocial treatments"[Title/Abstract] OR psychotherapy[Title/Abstract] OR psychotherapies[Title/Abstract] OR "psychotherapeutic counsel"[Title/Abstract] OR "psychotherapeutic counseling"[Title/Abstract] OR "psychotherapeutic counselling"[Title/Abstract] OR "psychotherapeutic processes"[Title/Abstract] OR "psychotherapeutic training"[Title/Abstract] OR "psychotherapeutic treatment"[Title/Abstract] OR "psychotherapeutic treatments"[Title/Abstract] OR "rational emotive"[Title/Abstract] OR "reality therapy"[Title/Abstract] OR "reality therapies"[Title/Abstract] OR "reciprocal inhibition"[Title/Abstract] OR rehabilitation[Title/Abstract] OR rehabilitating[Title/Abstract] OR "relationship therapy"[Title/Abstract] OR "relationship therapies"[Title/Abstract] OR relaxation[Title/Abstract] OR "reminiscence therapy"[Title/Abstract] OR "reminiscence therapies"[Title/Abstract] OR rogerian[Title/Abstract] OR "role play"[Title/Abstract] OR "role plays"[Title/Abstract] OR "role playing"[Title/Abstract] OR "self analysis"[Title/Abstract] OR "self analysing"[Title/Abstract] OR "self esteem"[Title/Abstract] OR "sensitivity training"[Title/Abstract] OR "sex therapy"[Title/Abstract] OR "sex therapies"[Title/Abstract] OR "sleep phase chronotherapy"[Title/Abstract] OR "sleep phase chronotherapies"[Title/Abstract] OR "social skills education"[Title/Abstract] OR "social skills training"[Title/Abstract] OR "socioenvironmental therapy"[Title/Abstract] OR "socioenvironmental therapies"[Title/Abstract] OR sociotherapy[Title/Abstract] OR sociotherapies[Title/Abstract] OR "solution focused"[Title/Abstract] OR "stress management"[Title/Abstract] OR "support group"[Title/Abstract] OR "support groups"[Title/Abstract] OR "supportive therapy"[Title/Abstract] OR "supportive therapies"[Title/Abstract] OR "systematic desensitization"[Title/Abstract] OR "systematic desensitisation"[Title/Abstract] OR "systemic therapy"[Title/Abstract] OR "systemic therapies"[Title/Abstract] OR "therapeutic community"[Title/Abstract] OR "therapeutic communities"[Title/Abstract] OR "transactional analysis"[Title/Abstract] OR transference[Title/Abstract] OR transtheoretical[Title/Abstract] OR "validation therapy"[Title/Abstract] OR "validation therapies"[Title/Abstract])
- #6 Serach ("Psychotherapy"[Mesh] or "Behavior Therapy"[Mesh] or "Cognitive Therapy"[Mesh] or "Complementary Therapies"[Mesh] or "Psychoanalysis"[Mesh] or "Counseling"[Mesh] or "Hypnosis"[Mesh] or "Association"[Mesh] or "Association Learning"[Mesh])
- #5 Search (#1 or #2 and #3 or #4)
- #4 Search (refugee\*[Title/Abstract] OR asylum seeker\*[Title/Abstract])
- #3 Search ("Refugees"[Mesh])
- #2 Search "Stress Disorders, Post-Traumatic"[Mesh]
- #1 Search "Mental Disorders"[Mesh]

## MEDLINE OVID

- 1 exp Post Traumatic Stress Disorder/  
 2 exp mental disorders/  
 3 exp refugee/  
 4 exp asylum seeker/  
 5 1 OR 2  
 6 3 OR 4  
 7 5 AND 6  
 8 exp Psychotherapy/ or exp Behavior Therapy/ or exp Cognitive Therapy/ or exp Complementary Therapies/  
 or exp Psychoanalysis/ or exp Counseling/ or exp Hypnosis/ or Association/ or Association learning/

9 (abreaction or "acceptance and commitment therapy" or acting out or adlerian or analytical psychotherap\$ or anger control or anger management or animal therap\$ or art therap\$ or assertive\$ training or attention training technique or autogenic training or autosuggestion or aversion therap\$ or balint group or befriending or behavio?r contracting or behavio?r modification or behavio?r regulation or behavio?r therap\$ or bibliotherap\$ or biofeedback or body psychotherap\$ or brief psychotherap\$ or caregiver support or cbt or client cent\$ or cognitive behavio?r\$ or cognitive intervention\$ or cognitive rehabilit\$ or cognitive remediation or cognitive technique\$ or cognitive therap\$ or cognitive treatment\$ or colo?r therap\$ or compassionate mind training or conjoint therap\$ or contingency management or conversational therap\$ or conversion therap\$ or coping skills or counsel?ing or countertransference or couples therap\$ or covert sensitization or crisis intervention or dance therap\$ or dialectic\$ or eclectic or emotion\$ focus\$ or emotional freedom technique or encounter group therap\$ or existential therap\$ or experiential psychotherap\$ or exposure therap\$ or expressive psychotherap\$ or eye movement desensiti?ation or family intervention\$ or family therap\$ or feminist therap\$ or free association or freudian or geriatric psychotherap\$ or gestalt therap\$ or griefwork or group intervention\$ or group psychotherap\$ or group therap\$ or guided image\$ or holistic psychotherap\$ or humanistic psychotherap\$ or hypnosis or hypnotherap\$ or hypnoti?zability or imagery or implosive therap\$ or individual psychotherap\$ or insight therap\$ or integrated psychological therapy or integrative psychotherap\$ or integrative therap\$ or interpersonal or jungian or kleinian or logotherap\$ or marathon group therap\$ or marital therap\$ or meditation or mental healing or metacognitive therap\$ or metacognitive training or milieu therap\$ or mindfulness or morita therap\$ or multimodal or music therap\$ or narrative therap\$ or nondirective therap\$ or object relations or person cent\$ therap\$ or personal construct therap\$ or persuasion therap\$ or pet therap\$ or play therap\$ or primal therap\$ or problem solving or psychoanaly\$ or psychodrama or psychodynamic or psychoeducat\$ or psychologic\$ or psychological therap\$ or psychosocial treatment or psychotherap\$ or psychotherapeutic counsel\$ or psychotherapeutic processes or psychotherapeutic training or psychotherapeutic treatment\$ or rational emotive or reality therap\$ or reciprocal inhibition or rehabilitat\$ or relationship therap\$ or relaxation or reminiscence therap\$ or rogerian or role play\$ or self analys\$ or self esteem or sensitivity training or sex therap\$ or sleep phase chronotherap\$ or social skills education or social skills training or socioenvironmental therap\$ or sociotherap\$ or solution focused or stress management or support group\$ or supportive therap\$ or systematic desensiti?ation or systemic therap\$ or therapeutic communit\$ or transactional analysis or transference or transtheoretical or validation therap\$ or (dream\$ adj3 analys\$) or (support adj3 psycho\$)).mp.

10 8 OR 9

11 exp clinical trial/

12 exp randomized controlled trials/

13 exp cross-over studies/

14 randomized controlled trial.pt.

15 clinical trial.pt.

16 (random\$ adj5 control\$ adj5 trial\$).mp.

17(crossover or cross-over).mp.

18 randomi\$.mp.

19 (random\$ adj5 (assign\$ or allocat\$ or assort\$ or reciev\$)).mp.

11 OR 12 OR 13 OR 14 OR 15 OR 16 OR 17 OR 18 OR 19

7 AND 10 AND 11

**PSYCINFO**

S1 asylum seeker\* OR refugee\* NOT migrant\*

S2 mental health OR mental disorders OR mental illness OR post traumatic stress disorder OR ptsd

S3 randomized controlled trials OR randomized control trial OR randomized OR random\*

S4 psychosocial interventions OR psychological OR treatment OR psychotherapy OR counseling

S5 (psychosocial interventions OR psychological OR treatment OR psychotherapy OR counseling) AND (S1 AND S2 AND S3 AND S4)

**WEB OF SCIENCE**

# 4 #3 AND #2 AND #1

# 3 TS=(psychother\* OR psychological OR psychosocial OR therapy OR intervent\* OR treatment OR counsel\* OR support\* OR mental)

# 2 TS=(refugee\* OR asylum seeker\* OR migrant\* OR immigrant)

# 1 TS=(randomized controlled trial OR randomized) AND TS=(controlled AND trial)

**COCHRANE CENTRAL REGISTER OF CONTROLLED TRIALS (CENTRAL)**

#1 MeSH descriptor: [Refugees] explode all trees

#2 MeSH descriptor: [Psychotherapy] explode all trees

#3 MeSH descriptor: [Counseling] explode all trees

#4 MeSH descriptor: [Therapeutics] explode all trees

#5 MeSH descriptor: [Cognitive Behavioral Therapy] explode all trees

#6 MeSH descriptor: [Complementary Therapies] explode all trees

#7 #2 OR #3 OR #4 OR #5 OR #6

#8 #1 AND #7 in *Trials*

**PILOTS PTSDpubs**

S1 AB, TI(refugee\* OR asylum seeker\*)

S2 AB, TI(psychological)

S3 AB, TI(psychotherapy)

S4 AB, TI(psychosocial)

S5 AB, TI(random\* control trial OR trial or controlled)

S6 AB, TI(psychological) OR AB, TI(psychotherapy) OR AB, TI(psychosocial)

S7 AB, TI(refugee\* OR asylum seeker\*) AND (AB, TI(psychological) OR AB, TI(psychotherapy) OR AB, TI(psychosocial)) AND ((random control trial) OR AB, TI(random\* control trial OR trial or controlled))

**CINAHL**

S1 asylum seeker\* OR refugee\* NOT migrant\*

S2 mental health OR mental disorders OR mental illness OR post traumatic stress disorder OR ptsd

S3 randomized controlled trials OR randomized control trial OR randomized OR random\*

S4 psychosocial interventions OR psychological OR treatment OR psychotherapy OR counselling

S5 (psychosocial interventions OR psychological OR treatment OR psychotherapy OR counseling) AND (S1 AND S2 AND S3 AND S4)

**EMBASE**

#1 asylum seeker\*:ab, ti OR refugee\*:ab, ti NOT migrant\*:ab, ti

- #2    mental health:ab,ti OR mental disorders:ab,ti OR mental illness:ab,ti OR post traumatic stress disorder:ab,ti OR ptsd:ab,ti
- #3    randomized AND controlled AND trial:ab,ti OR controlled AND clinical AND trial:ab,ti OR random\*:ab,ti
- #4    psychosocial intervention\*:ab,ti OR psychological:ab,ti OR treatment:ab,ti OR psychotherapy:ab,ti OR counselling:ab,ti
- #5    #1 AND #2 AND #3 AND #4

## Description of included intervention and belonging node

### Legend:

CBT: cognitive behavioural therapy

EMDR: eye movement desensitization and reprocessing

NET: narrative exposure therapy

SC: supportive/trauma counselling

SH+: self-help plus

SSM: stabilization/stress management

| Intervention                                                 | Description                                                                                                                                                                                                                                                                                                                                                                                                                                                                                                                                                                                                                                                                                                                                                                                                                                                                                              | Node                            |
|--------------------------------------------------------------|----------------------------------------------------------------------------------------------------------------------------------------------------------------------------------------------------------------------------------------------------------------------------------------------------------------------------------------------------------------------------------------------------------------------------------------------------------------------------------------------------------------------------------------------------------------------------------------------------------------------------------------------------------------------------------------------------------------------------------------------------------------------------------------------------------------------------------------------------------------------------------------------------------|---------------------------------|
| Coffee and Family Education and Support Intervention (CAFES) | A community-based, family-focused program that is aimed at improving access to mental health services by impacting family processes. CAFES was based upon family strength and resilience approaches which emphasized the roles of family processes in facilitating adjustment, recovery, and development. Phase I: Joining Engagement<br>Session 1 Families in transition<br>Phase II: Defining the family<br>Session 2 Family as a system<br>Session 3 Family in the life cycle<br>Session 4 Family beliefs<br>Phase III: Working together in the family<br>Session 5 Strengthening family identity<br>Session 6 Family communication (Part 1)<br>Session 7 Family communication (Part 2)<br>Phase IV: Using resources outside of the family<br>Session 8 Families to organizations<br>Session 9 Families to families                                                                                   | Not included (no suitable data) |
| Cognitive Behavioural Therapy (CBT)                          | A goal-oriented treatment that focuses on how cognitions affect emotions and and behaviour and teaches coping skills for dealing with present problems.<br><br>CBT can be culturally adapted and the core elements of the intervention are: psychoeducation about the nature of PTSD; training on relaxation techniques; cognitive restructuring; emotional regulation; exposure; homework to practice skills. Another approach is a biofeedback-based cognitive behavioural intervention (CBT-BF) treatment for pain management in traumatized refugees. This intervention focuses on hyperarousal as the key factor in the chronification of PTSD and pain and facilitates the development of strategies for coping with pain and PTSD symptoms. The manualized CBT-BF protocol consists of 10 weekly 90-minute sessions covering psychoeducation, relaxation strategies, and cognitive restructuring. | CBT                             |
| Cognitive Restructuring (CR)                                 | The CR manual consisted mainly of psychoeducation and cognitive restructuring of negative thoughts resulting from traumatic experience, and exposure. The structure of the CR manual was based on a number of themes for the therapist to select from, based on clinical evaluation and the capabilities and needs of the patient. Each theme consisted of psychoeducation, suggestions for interventions as well as suggestions for homework assignments.                                                                                                                                                                                                                                                                                                                                                                                                                                               | CBT                             |
| Exposure Therapy (ET)                                        | In this intervention patient is gradually confronted with anxiety-provoking trauma-related images and situations with the help of the therapist. Each step is completed when the patient successfully habituated to the trauma cues.                                                                                                                                                                                                                                                                                                                                                                                                                                                                                                                                                                                                                                                                     | CBT                             |



|                                                      |                                                                                                                                                                                                                                                                                                                                                                                                                                                                                                                                                                                                                                                                                                                                                                                                                                                                                                                                                                                                                                                                                                                                                        |      |
|------------------------------------------------------|--------------------------------------------------------------------------------------------------------------------------------------------------------------------------------------------------------------------------------------------------------------------------------------------------------------------------------------------------------------------------------------------------------------------------------------------------------------------------------------------------------------------------------------------------------------------------------------------------------------------------------------------------------------------------------------------------------------------------------------------------------------------------------------------------------------------------------------------------------------------------------------------------------------------------------------------------------------------------------------------------------------------------------------------------------------------------------------------------------------------------------------------------------|------|
|                                                      | Exposure is initially conducted imaginally, and later in trauma-related, but harmless in vivo situations. If it was difficult to activate the trauma-related responses through imaginal exposure, and/or if in vivo exposure was not feasible, exposure to trauma cues it could be conducted with the help of traumatic video movie scenes.                                                                                                                                                                                                                                                                                                                                                                                                                                                                                                                                                                                                                                                                                                                                                                                                            |      |
| Eye Movement Desensitization and Reprocessing (EMDR) | Eye Movement Desensitization and Reprocessing (EMDR) is a psychotherapy treatment that was originally designed to alleviate the distress associated with traumatic memories. During EMDR therapy the client attends to emotionally disturbing material in brief sequential doses while simultaneously focusing on an external stimulus. Therapist directed lateral eye movements are the most commonly used external stimulus but a variety of other stimuli including hand-tapping and audio stimulation are often used. EMDR therapy facilitates the accessing of the traumatic memory network, so that information processing is enhanced, with new associations forged between the traumatic memory and more adaptive memories or information. These new associations are thought to result in complete information processing, new learning, elimination of emotional distress, and development of cognitive insights.                                                                                                                                                                                                                            | EMDR |
| Narrative Exposure Therapy (NET)                     | It is a treatment for trauma-spectrum disorders in survivors of multiple and complex trauma. During the therapy sessions, the patient, assisted by the therapist, constructs a detailed chronological account of his or her own biography. The autobiography is recorded by the therapist in written form and is corrected and elaborated on each subsequent reading. The therapist writes down the biography and reads it aloud at the beginning of each following session for completion and correction. The aim of the therapy is the reorganization of the generally fragmented report of traumatic experiences into a coherent narrative. During the confrontation with the aversive life events, the therapist asks for current and past emotional, physiological, cognitive, and behavioural reactions, and probes for respective observations. During the last session, the participant receives the written report of the biography.                                                                                                                                                                                                          | NET  |
| Self Help Plus (SH+)                                 | Self-Help Plus is based on acceptance and commitment therapy (ACT), a modern variant of cognitive behavioural therapy. ACT builds on the cognitive behavioural therapy tradition and includes some common elements (such as engagement and psychoeducation); however, ACT uses specific techniques (eg, cognitive defusion, mindfulness exercises, and values clarification exercises) to help promote psychological flexibility—the ability to contact the present moment more fully and to maintain or change behaviour so that the person behaves in a way that is consistent with their subjectively identified values. Self-Help Plus incorporates many of these factors, with a strong focus on mindful practices and grounding, values clarification, and compassion, with the latter also encouraging a social support element through the practice of acts of kindness towards others outside of sessions. ACT is a-diagnostic, in that it is not a syndrome-based or symptom-based approach. Instead it aims to support people in finding more functional ways of coping with difficult life experiences given their self-identified values. | SH+  |
| Stress Inoculation Training (SIT)                    | It is a cognitive behavioural semistructured program aimed at enhancing the patient's ability to cope with stress. Techniques applied in SIT are training in breathing techniques, relaxation training, cognitive restructuring, thought stopping, guided selfdialog, covert modeling, and role play. Initially, the participant is asked to report several current stressful situations, both trauma related and of everyday stress. Subsequently, the participant is taught different coping strategies for stress and anxiety, which are practiced referring to the respective examples of stressful situations. First of all, the participant receives                                                                                                                                                                                                                                                                                                                                                                                                                                                                                             | SSM  |

|                            |                                                                                                                                                                                                                                                                                                                                                                                                                                                                                                                                                                                                              |     |
|----------------------------|--------------------------------------------------------------------------------------------------------------------------------------------------------------------------------------------------------------------------------------------------------------------------------------------------------------------------------------------------------------------------------------------------------------------------------------------------------------------------------------------------------------------------------------------------------------------------------------------------------------|-----|
|                            | training in breathing techniques. On the cognitive level, the participant is trained in cognitive restructuring in order to reach a different view of the situations that he or she finds difficult and scary. The patient is also taught thought stopping in order to be able to stop rumination. Finally, in guided self-dialog the patient is instructed to find helpful, positive sentences in order to cope better with stressful situations. The patient is asked to write down these sentences on pleasant picture postcards. On the behavioural level, covert modeling and role play are introduced. |     |
| Stress Management (SM)     | The most common SM programme for PTSD is Stress Inoculation Training (Meichenbaum, 2007). The primary goal of the therapy is to help patients acquire and consolidate a number of coping skills. Thus, the sessions focus on learning and applying new coping skills. The SM manual usually include the following techniques: (1) relaxation, (2) attention diversion and (3) behavioural activation.                                                                                                                                                                                                        | SSM |
| Stabilization Therapy (ST) | The aim of stabilisation is to defined as the establishment of safety in physical, cognitive-behavioural, interpersonal, and social areas of functioning.<br><br>The first phase or stabilisation phase is aimed at enhancing safety, control over symptoms and socio-psychological competencies through interventions such as emotion regulation and relational skills building, stress management and cognitive restructuring; processing of traumatic memories is left until the second phase.                                                                                                            | SSM |
| Supportive counseling (SC) | There is not a standardized procedure of this intervention.<br><br>The main goal of supportive counseling is to explore and strengthen the participants' individual, social, and cultural resources. The focus of the treatment is on current interpersonal problems, personal decisions, and plans and hopes for the future.                                                                                                                                                                                                                                                                                | SC  |
| Trauma Counseling (TC)     | It is a combination of a variety of treatment and counseling methods. It is oriented toward the psychological and social needs expressed by the individual client, in particular, the discussion of current life problems and conflicts. The principle of TC is to relate current problems to past traumatic experiences. Additional skills of TC include nondirective active listening, problem solving, the exploration of coping skills, and grief interventions.                                                                                                                                         | SC  |

### Characteristics of included studies

| First author, year, country          | Participants' country of origin                        | Intervention      | Intervention level - n° of sessions | Comparison              | Sample size | % women | Mean age (SD or range) | PTSD diagnostic instrument                                    | Setting             | Lenght of follow-up (months) | Concomitant medication |
|--------------------------------------|--------------------------------------------------------|-------------------|-------------------------------------|-------------------------|-------------|---------|------------------------|---------------------------------------------------------------|---------------------|------------------------------|------------------------|
| <b>Acarturk 2015, Turkey</b>         | Syria                                                  | EMDR              | I - 7                               | Waiting list            | 29          | 76%     | 36.55 (11.28)          | Impact of Event Scale-Revised - IES-R                         | Refugee Camp        | 3                            | No                     |
| <b>Acarturk 2016, Turkey</b>         | Syria                                                  | EMDR- R TEP       | I - 4                               | Waiting list            | 98          | 74%     | 33.68 (10.51)          | M.I.N.I. Neuropsychiatric Interview - PLUS                    | Refugee Camp        | 2                            | No                     |
| <b>Adenauer 2011, Germany</b>        | Middle East; Central East; The Balkans; Africa         | NET               | I - 12                              | Waiting list            | 34          | 44%     | 33.53 (9.93)           | Clinician Administered PTSD Scale - CAPS                      | Health-care setting | 6                            | Yes                    |
| <b>Buhmann 2016, Denmark</b>         | Iraq, Iran, Lebanon, Ex Yugoslavia, Afghanistan, Other | CBT               | I - 12                              | Waiting list            | 280         | 41%     | 45.00 (9.00)           | The ICD-10 Classification of Mental and Behavioural Disorders | Health-care setting | 6                            | Yes                    |
| <b>Carlsson 2018, Denmark</b>        | Iraq, Iran, Lebanon, Ex Yugoslavia, Afghanistan, Other | Stress management | I - 16                              | Cognitive restructuring | 140         | 44%     | 43.30 (9.50)           | The ICD-10 Classification of Mental and Behavioural Disorders | Health-care setting | 7                            | Yes                    |
| <b>Hensel-Dittmann 2011, Germany</b> | Unclear                                                | NET               | I - 10                              | SIT                     | 28          | /       | /                      | Clinician Administered PTSD Scale - CAPS                      | Health-care setting | 12                           | No                     |

|                                                    |                                    |        |        |                                             |     |      |                         |                                                                 |                     |              |     |
|----------------------------------------------------|------------------------------------|--------|--------|---------------------------------------------|-----|------|-------------------------|-----------------------------------------------------------------|---------------------|--------------|-----|
| <b>Hijazi 2014, USA</b>                            | Iraq, Syria; Jordan; Turkey; Other | NET    | I - 3  | Waiting list                                | 63  | 56%  | 48.20 (8.90)            | Harvard Trauma Questionnaire – HTQ                              | Social care setting | 4            | No  |
| <b>Hinton 2004, USA</b>                            | Vietnam                            | CBT    | I - 11 | Waiting list                                | 12  | 50%  | /                       | Structured Clinical Interview for DSM-IV - SCID module for PTSD | Health-care setting | 6            | Yes |
| <b>Hinton 2005, USA</b>                            | Cambodia                           | CBT    | I - 12 | TAU                                         | 40  | 60%  | 51.80 (6.78)            | Clinician Administered PTSD Scale - CAPS                        | Health-care setting | 9            | Yes |
| <b>Hinton 2009, USA</b>                            | Cambodia                           | CBT    | I - 12 | TAU                                         | 24  | 60%  | 49.50 (8.26)            | Clinician Administered PTSD Scale - CAPS                        | Health-care setting | 9            | No  |
| <b>Liedl et al., 2011, Germany and Switzerland</b> | Balkans, Turkey, other Countries   | CBT-BF | I - 10 | Waiting list vs. CBT-BF + physical activity | 36  | 43%  | 41.66 (9.90)            | M.I.N.I. Neuropsychiatric Interview                             | Health-care setting | 5            | No  |
| <b>Neuner et al., 2004, Uganda</b>                 | Sudan                              | NET    | I - 4  | TAU vs. Supportive Counseling               | 43  | 63%  | 33.16 (7.00)            | Composite International Diagnostic Interview - CIDI             | Refugee camp        | 13           | No  |
| <b>Neuner et al., 2008, Uganda</b>                 | Somalia, Rwanda                    | NET    | I - 6  | No treatment vs. Trauma counseling          | 277 | 51%  | 34.96 (12.70)           | Composite International Diagnostic Interview - CIDI             | Refugee camp        | 6            | No  |
| <b>Neuner et al., 2010, Germany</b>                | Turkey, Balkans, Africa            | NET    | I - 9  | TAU                                         | 32  | 31%  | 31.35 (7.60)            | Posttraumatic Stress Diagnostic Scale - PDS                     | Health-care setting | 8            | Yes |
| <b>Otto et al., 2003, USA</b>                      | Cambodia                           | CBT    | G - 10 | TAU                                         | 10  | 100% | 47.20 (SD not reported) | Structured Clinical Interview for DSM-IV - SCID I               | Buddhist temple     | not reported | Yes |

|                                                |                                                                      |            |        |                       |     |      |               |                                                                            |                     |    |     |
|------------------------------------------------|----------------------------------------------------------------------|------------|--------|-----------------------|-----|------|---------------|----------------------------------------------------------------------------|---------------------|----|-----|
| <b>Paunovic &amp; Ost, 2001, Sweden</b>        | Unclear                                                              | CBT        | I - 18 | Exposure Therapy      | 20  | 15%  | 37.90 (7.60)  | Clinician Administered PTSD Scale - CAPS                                   | Health-care setting | 6  | Yes |
| <b>Shaw et al., 2018, Malaysia</b>             | Afghanistan                                                          | CA-CBT     | G - 8  | Waiting list          | 29  | 100% | 31.86 (9.80)  | Harvard Trauma Questionnaire – HTQ                                         | Social care setting | 5  | No  |
| <b>Stenmark et al., 2013, Norway</b>           | Iraq, Afghanistan, Middle East Countries, Africa, other Countries    | NET        | I - 10 | TAU                   | 81  | 31%  | 35.27 (11.04) | Clinician Administered PTSD Scale - CAPS                                   | Health-care setting | 8  | Yes |
| <b>ter Heide et al., 2011, The Netherlands</b> | Afghanistan, Algeria, Angola, Bosnia, Iran, Iraq, Lebanon and Turkey | EMDR       | I - 11 | Stabilisation therapy | 20  | 40%  | 41.50 (8.55)  | Structured Clinical Interview for DSM-IV - SCID I                          | Health-care setting | 3  | Yes |
| <b>ter Heide et al., 2016, The Netherlands</b> | Unclear                                                              | EMDR       | I - 9  | Stabilisation therapy | 74  | 28%  | 41.45 (11.35) | Clinician Administered PTSD Scale - CAPS; M.I.N.I. Interview               | Health-care setting | 3  | Yes |
| <b>Tol et al., 2020, Uganda</b>                | South Sudan                                                          | SH+        | G - 5  | ETAU                  | 694 | 100% | 30.9 (10.90)  | PTSD Checklist-Civilian six-item version (PCL-6)                           | Refugee camp        | 4  | No  |
| <b>Weine et al., 2008, USA</b>                 | Bosnia                                                               | CAFES      | G - 9  | No treatment          | 197 | 52%  | 37.70 (9.80)  | PTSD Symptoms Scale; Diagnostic and Statistical Manual of Mental Disorders | Community           | 18 | No  |
| <b>Yurtsever et al., 2018, Turkey</b>          | Syria                                                                | EMDR-G-TAP | G - 2  | Waiting list          | 47  | 77%  | 37.45 (11.08) | M.I.N.I. Neuropsychiatric Interview                                        | Refugee camp        | 1  | No  |

**Abbreviations:** I: individual; G: group; CBT-BF: biofeedback-based Cognitive Behavioural Intervention; NET: Narrative Exposure Therapy; CBT: Cognitive Behavioural Therapy; CA-CBT: Culturally Adapted Cognitive Behavioural Therapy; EMDR: Eye Movement Desensitization and Reprocessing; SH+: Self-Help Plus; CAFES: Coffee and Family Education and Support; EMDR-G-TAP: Eye Movement Desensitization and Reprocessing - Group Traumatic Episode Protocol; SIT: stress inoculation training; TAU: Treatment as usual; ETAU: Enhanced treatment as usual; MINI: MINI International Neuropsychiatric Interview; PDS: Post Traumatic Stress Diagnostic scale; HTQ: Harvard Trauma questionnaire; HSCL-25: Hopkins Symptoms Checklist-25; VRS: Verbal Rating Scale; FESV: German Pain Coping Questionnaire; CIDI: Composite International Diagnostic Interview; CIDI-C: Composite International Diagnostic Interview Part C; DFMQ: The Demographic of Forced Migration Questionnaire; SRQ-20: Self-REPORTING Questionnaire 20; SF-12: 12-item version of the Medical Outcome Study Self Report Form; VCOV: Vivo-Checklist of Organised Violence; SCID: Structured Clinical Interview for DSM-IV; CAPS: Clinician Administered PTSD Scale; SCL-90: Symptom Checklist-90-R; ASI: Anxiety Sensitivity Index; HAS: Hamilton Anxiety Scale; HDS: Hamilton Depression Scale; PSS-SR: PTSD Symptom Scale - Self Report; IES-R: Impact of Event Scale-Revised; BAI: Beck Anxiety Inventory; STAI-S+T: State Trait Anxiety Inventory; BDI: Beck Depression Inventory; WAS: World Assumptions Scale; QOLI: Quality of Life Inventory; RHS-15: Refugee Health Screener-15; MOS Social support: Medical Outcomes Study; WHOQOL: World Health Organization Quality of Life Assessment-BREF version; K6: Kessler 6; PSYCHLOPS: Psychological Outcome Profiles instrument; PHQ-9: Patient Health Questionnaire-9 item; AAI-II: Acceptance and Action Questionnaire; WHODAS: WHO Disability Assessment Schedule 2.0; WHO-5: WHO-5 Wellbeing Index; CES-D: The Center for Epidemiological Studies Depression Scale; SS-VEF: steady-state visual evoked fields; VAS: visual analogue pain scales; SDS: Sheehan Disability Scale; SIT: Stress Inoculation Training; HPASS: Headache Panic Attack Severity Scale; OPASS: Orthostatic Panic Attack Severity Scale; NPASS: Neck Panic Attack Severity Scale; N-FSS: Neck-Panic Flashback Severity Scale; O-FSS: Orthostatic-Panic Flashback Severity Scale; ERS: Emotion Regulation Scale; O-CCSS: Orthostatic-PA Catastrophic Cognition Severity Scale.

## List of studies included, excluded, awaiting assessment and ongoing

### Included studies

1. Acarturk C, Konuk E, Cetinkaya M, Senay I, Sijbrandij M, Cuijpers P, Aker T (2015). EMDR for Syrian refugees with posttraumatic stress disorder symptoms: results of a pilot randomized controlled trial. *European Journal of Psychotraumatology*; 6:27414.
2. Acarturk C, Konuk E, Cetinkaya M, Senay I, Sijbrandij M, Gulen B, Cuijpers P (2016). The efficacy of eye movement desensitization and reprocessing for post-traumatic stress disorder and depression among Syrian refugees: results of a randomized controlled trial. *Psychological Medicine*; 46(12): 2583.
3. Adenauer H, Catani C, Gola H, Keil J, Ruf M, Schauer M, Neuner F (2011). Narrative exposure therapy for PTSD increases top-down processing of aversive stimuli-evidence from a randomized controlled treatment trial. *BMC Neuroscience*; 12(127):1–13.
4. Buhmann CB, Nordentoft M, Ekstroem M, Carlsson J, Mortensen EL (2016). The effect of flexible cognitive-behavioural therapy and medical treatment, including antidepressants on post-traumatic stress disorder and depression in traumatised refugees: pragmatic randomised controlled clinical trial. *The British Journal of Psychiatry*; bjp.bp.114.150961. Secondary publication: Buhmann CB, Nordentoft M, Ekstroem M, Carlsson J, Mortensen EL (2018). Long-term treatment effect of trauma-affected refugees with flexible cognitive behavioural therapy and antidepressants. *Psychiatry Research*; 264:217–223.
5. Carlsson J, Sonnea C, Vindbjerga E, Lykke Mortensenc E (2018). Stress management versus cognitive restructuring in trauma-affected refugees—A pragmatic randomised study. *Psychiatry Res.* 266:116-123.
6. Hensel-Dittmann D, Schauer M, Ruf M, Catani C, Odenwald M, Elbert T, Neuner F (2011). Treatment of traumatized victims of war and torture: a randomized controlled comparison of narrative exposure therapy and stress inoculation training. *Psychotherapy and Psychosomatics*; 80(6):345–52.
7. Hijazi AM, Lumley MA, Ziadni MS, Rapport LJ, Arnetz BB (2014). Brief narrative exposure therapy for posttraumatic stress in Iraqi refugees: a preliminary randomized clinical trial. *Journal of Traumatic Stress*; 27:314–22.
8. Hinton DE, Hofmann SG, Pollack MH, Otto MW (2009). Mechanisms of efficacy of CBT for Cambodian refugees with PTSD: Improvement in emotion regulation and orthostatic blood pressure response. *CNS neuroscience & therapeutics*; 15(3), 255-263.
9. Hinton DE, Chhean D, Pich V, Safren SA, Hofmann SG, Pollack MH (2005). A randomized controlled trial of cognitive-behavior therapy for Cambodian refugees with treatment-resistant PTSD and panic attacks: A cross-over design. *Journal of Traumatic Stress*; 18:617– 629.
10. Hinton DE, Pham T, Tran M, Safren SA, Otto MW, Pollack MH (2004). CBT for Vietnamese refugees with treatment-resistant PTSD and panic attacks: a pilot study. *Journal of Traumatic Stress*; 17(5): 429-33.
11. Liedl A, Muller J, Morina N, Karl A, Denke C, Knaevelsrud C (2011) Physical activity within a CBT intervention improves coping with pain in traumatized refugees: results of a randomized controlled design. *Pain*; 12(2): 234–45.
12. Neuner F, Kurreck S, Ruf M, Odenwald M, Elbert T, Schauer M (2010). Can asylum seekers with posttraumatic stress disorder be successfully treated? A randomized controlled pilot study. *Cognitive Behaviour Therapy*; 39(3):81–91. Secondary publication: Schauer M, Elbert T, Gotthardt S,

- Rockstroh B, Odenwald M, Neuner F (2006). Imaginary reliving in psychotherapy modifies mind and brain. *Verhaltenstherapie*; 16(2):96–103.
13. Neuner F, Schauer M, Klaschik C, Karunakara U, Elbert T (2004). A comparison of narrative exposure therapy, supportive counseling, and psychoeducation for treating posttraumatic stress disorder in an african refugee settlement. *Journal of consulting and clinical psychology*; 72(4): 579.
  14. Neuner F, Onyut PL, Ertl V, Odenwald M, Schauer E, Elbert T (2008). Treatment of posttraumatic stress disorder by trained lay counselors in an African refugee settlement: a randomized controlled trial. *Journal of consulting and clinical psychology*; 76(4): 686.
  15. Otto MW, Hinton D, Korbly NB, Chea A, Phalnarith B, Gershuny BS, Pollack MH (2003). Treatment of pharmacotherapy-refractory posttraumatic stress disorder among Cambodian refugees: A pilot study of combination treatment with cognitive-behavior therapy vs. sertraline alone. *Behaviour Research and Therapy*; 41:1271–1276.
  16. Paunovic N, Öst LG (2001). Cognitive-behavior therapy vs. exposure therapy in the treatment of PTSD in refugees. *Behaviour Research and Therapy*; 39:1183–1197.
  17. Shaw SA, Ward KP, Pillai V, Hinton DE (2018). A group mental health randomized controlled trial for female refugees in Malaysia. *Am J Orthopsychiatry*; doi: 10.1037/ort0000346.
  18. Stenmark H, Catani C, Neuner F, Elbert T, Holen A (2013). Treating PTSD in refugees and asylum seekers within the general health care system. A randomized controlled multicenter study. *Behaviour Research and Therapy*; 51:641–7. Secondary publication: Halvorsen JØ, Stenmark H, Neuner F, Nordahl HM (2014). Does dissociation moderate treatment outcomes of narrative exposure treatment for PTSD? A secondary analysis from a randomized controlled clinical trial. *Behaviour Research and Therapy*; 57:21–8.
  19. Ter Heide FJ, Mooren TM, van de Schoot R, de Jongh A, Kleber RJ (2016). Eye movement desensitisation and reprocessing therapy v. stabilisation as usual for refugees: randomised controlled trial. *The British Journal of Psychiatry*; bjp.bp.115.167775.
  20. ter Heide JJ, Mooren TM, Kleijn W, de Jongh A, Kleber RJ (2011). EMDR versus stabilisation in traumatised asylum seekers and refugees: results of a pilot study. *European Journal of Psychotraumatology*; 2:5881.
  21. Weine S, Kulauzovic Y, Klebic A, Besic S, Mujagic A, Muzurovic J, Spahovic D, Sclove S, Pavkovic I, Feetham S, Rolland J (2008). Evaluating a multiple-family group access intervention for refugees with PTSD. *Journal of Marital and Family Therapy*; 34:149–164.
  22. Yurtsever A, Konuk E, Akyüz T, Zat Z, Tükel F, Çetinkaya M, Savran C, Shapiro E (2018). An Eye Movement Desensitization and Reprocessing (EMDR) Group Intervention for Syrian Refugees with Post-Traumatic Stress Symptoms: Results of a Randomized Controlled Trial. *Front Psychol*; 9:493.
  23. Tol W, Leku MR, Lakin DP, Carswell K, Augustinavicius J, Adaku A, Au T, Brown FL, Bryant RA, C Garcia-Moreno, Musci RJ, Ventevogel P, White R, van Ommeren M (2020). Guided self-help to reduce psychological distress in South Sudanese female refugees in Uganda: a cluster randomised trial. *Lancet Glob Health*; 8:e254–63

### Excluded studies

| N | Reference                                                                                                      | Reason             |
|---|----------------------------------------------------------------------------------------------------------------|--------------------|
| 1 | Ainamani HE, Elbert T, Olema DK, Hecker T (2017). PTSD symptom severity relates to cognitive and psycho-social | Wrong study design |



|    |                                                                                                                                                                                                                                                                                                                                  |                    |
|----|----------------------------------------------------------------------------------------------------------------------------------------------------------------------------------------------------------------------------------------------------------------------------------------------------------------------------------|--------------------|
|    | dysfunctioning—a study with Congolese refugees in Uganda. <i>European journal of psychotraumatology</i> ; 8(1),1283086.                                                                                                                                                                                                          |                    |
| 2  | Alghamdi M, Hunt N, Thomas S (2015). The effectiveness of Narrative Exposure Therapy with traumatised firefighters in Saudi Arabia: A randomized controlled study. <i>Behaviour research and therapy</i> ; 66,64-71.                                                                                                             | Wrong population   |
| 3  | Arntz A, Sofi D, van Breukelen G (2013). Imagery Rescripting as treatment for complicated PTSD in refugees: a multiple baseline case series study. <i>Behaviour Research and Therapy</i> ; 51(6):274-83                                                                                                                          | Wrong study design |
| 4  | Asukai N, Saito A, Tsuruta N, Kishimoto J, Nishikawa T (2010). Efficacy of exposure therapy for Japanese patients with posttraumatic stress disorder due to mixed traumatic events: A randomized controlled study. <i>Journal of traumatic stress</i> ; 23(6),744-750.                                                           | Wrong population   |
| 5  | Baker F, Jones C (2006). The effect of music therapy services on classroom behaviours of newly arrived refugee students in Australia—a pilot study. <i>Emotional and Behavioural Difficulties</i> ; 11(4),249-260.                                                                                                               | Wrong outcome      |
| 6  | Bass J, Neugebauer R, Clougherty KF, Verdelli H, Wickramaratne P, Ndogoni L, Speelman L, Weissman M, Bolton P (2006). Group interpersonal psychotherapy for depression in rural Uganda: 6-month outcomes. <i>The British Journal of Psychiatry</i> ; 188(6),567-573.                                                             | Wrong population   |
| 7  | Bass J, Murray SM, Mohammed TA, Bunn M, Gorman W, Ahmed AM, Murray L, Bolton P. (2016). A randomized controlled trial of a trauma-informed support, skills, and psychoeducation intervention for survivors of torture and related trauma in Kurdistan, Northern Iraq. <i>Global Health: Science and Practice</i> ; 4(3),452-466. | Wrong population   |
| 8  | Beck BD, Messel C, Meyer SL, Cordtz TO, Sjøgaard U, Simonsen E, Moe T (2018). Feasibility of trauma-focused Guided Imagery and Music with adult refugees diagnosed with PTSD: A pilot study. <i>Nordic Journal of Music Therapy</i> ; 27(1),67–86.                                                                               | Wrong study design |
| 9  | Betancourt TS, Newnham EA, Brennan RT, Verdelli H, Borisova I, Neugebauer R, Bass J, Bolton P (2012). Moderators of treatment effectiveness for war-affected youth with depression in northern Uganda. <i>Journal of Adolescent Health</i> ; 51(6),544-550.                                                                      | Wrong population   |
| 10 | Bichescu D, Neuner F, Schauer M, Elbert T (2007). Narrative exposure therapy for political imprisonment-related chronic                                                                                                                                                                                                          | Wrong population   |

|    |                                                                                                                                                                                                                                                                                                                                                                    |                    |
|----|--------------------------------------------------------------------------------------------------------------------------------------------------------------------------------------------------------------------------------------------------------------------------------------------------------------------------------------------------------------------|--------------------|
|    | posttraumatic stress disorder and depression. Behaviour research and therapy; 45(9),2212-2220.                                                                                                                                                                                                                                                                     |                    |
| 11 | Birman D, Beehler S, Harris EM, Everson ML, Batia K, Liautaud J, Frazier S, Atkins M, Blanton S, Buwalda J, Fogg L, Cappella E (2008). International Family, Adult, and Child Enhancement Services (FACES): a community-based comprehensive services model for refugee children in resettlement. American Journal of Orthopsychiatry; 78(1),121.                   | Wrong study design |
| 12 | Bolton P, Bass J, Neugebauer R, Verdelli H, Clougherty KF, Wickramaratne P, Speelman L, Ndogoni L, Weissman M (2003). Group interpersonal psychotherapy for depression in rural Uganda: a randomized controlled trial. Jama; 289(23),3117-3124.                                                                                                                    | Wrong population   |
| 13 | Bolton P, Bass JK, Zangana GA, Kamal T, Murray SM6, Kaysen D, Lejuez CW, Lindgren K, Pagoto S, Murray LK, Van Wyk SS, Ahmed AM, Amin NM, Rosenblum M. (2014). A randomized controlled trial of mental health interventions for survivors of systematic violence in Kurdistan, Northern Iraq. BMC psychiatry;14(1), 360.                                            | Wrong population   |
| 14 | Bolton P, Lee C, Haroz EE, Murray L, Dorsey S, Robinson C, Ugueto AM, Bass J (2014). A transdiagnostic community-based mental health treatment for comorbid disorders: development and outcomes of a randomized controlled trial among Burmese refugees in Thailand. PLoS Medicine; 11(11):e1001757.                                                               | Wrong population   |
| 15 | Böttche M, Kuwert P, Pietrzak RH, Knaevelsrud C (2016). Predictors of outcome of an Internet-based cognitive-behavioural therapy for post-traumatic stress disorder in older adults. Psychology and Psychotherapy: Theory, Research and Practice; 89(1),82-96.                                                                                                     | Wrong population   |
| 16 | Bryant RA, Schafer A, Dawson KS, Anjuri D, Mulili C, Ndogoni L, Koyiet P, Sijbrandij M, Ulate J, Harper Shehadeh M, Hadzi-Pavlovic D, van Ommeren M (2017). Effectiveness of a brief behavioural intervention on psychological distress among women with a history of gender-based violence in urban Kenya: A randomised clinical trial. PLoS Med; 14(8):e1002371. | Wrong population   |
| 17 | Catani C, Kohiladevy M, Ruf M, Schauer E, Elbert T, Neuner F (2009). Treating children traumatized by war and Tsunami: a comparison between exposure therapy and meditation-relaxation in North-East Sri Lanka. BMC psychiatry; 9(1),22.                                                                                                                           | Wrong population   |
| 18 | Dajani R, Hadfield K, van Uum S, Greff M, Panter-Brick C (2017). Hair cortisol concentrations in war-affected adolescents: A                                                                                                                                                                                                                                       | Wrong population   |

|    |                                                                                                                                                                                                                                                                                                 |                    |
|----|-------------------------------------------------------------------------------------------------------------------------------------------------------------------------------------------------------------------------------------------------------------------------------------------------|--------------------|
|    | prospective intervention trial. <i>Psychoneuroendocrinology</i> ; 89:138-146.                                                                                                                                                                                                                   |                    |
| 19 | Dawson KS, Schafer A, Anjuri D, Ndogoni L, Musyoki C, Sijbrandij M, van Ommeren M, Bryant RA (2016). Feasibility trial of a scalable psychological intervention for women affected by urban adversity and gender-based violence in Nairobi. <i>BMC Psychiatry</i> ; 16(1):410.                  | Wrong study design |
| 20 | Drozdek B (1997). Follow-up study of concentration camp survivors from Bosnia-Herzegovina: three years later. <i>The Journal of nervous and mental disease</i> ; 185(11), 690-694.                                                                                                              | Wrong study design |
| 21 | Droždek B, Bolwerk N (2010). Evaluation of group therapy with traumatized asylum seekers and refugees—The Den Bosch Model. <i>Traumatology</i> ; 16(4),117.                                                                                                                                     | Wrong study design |
| 22 | Droždek B, Kamperman AM, Bolwerk N, Tol WA, Kleber RJ. (2012). Group therapy with male asylum seekers and refugees with posttraumatic stress disorder: A controlled comparison cohort study of three day-treatment programs. <i>The Journal of nervous and mental disease</i> ; 200(9),758-765. | Wrong population   |
| 23 | Ertl V, Pfeiffer A, Schauer E, Elbert T, Neuner F (2011). Community-implemented trauma therapy for former child soldiers in Northern Uganda: a randomized controlled trial. <i>Jama</i> ; 306(5),503-512.                                                                                       | Wrong population   |
| 24 | Esala JJ, Taing S (2017). Testimony Therapy With Ritual: A Pilot Randomized Controlled Trial. <i>Journal of traumatic stress</i> ; 30(1),94-98.                                                                                                                                                 | Wrong population   |
| 25 | Goodkind JR, Amer S, Christian C, Hess JM, Bybee D, Isakson BL, Baca B, Ndayisenga M, Greene RN, Shantzek C (2017). Challenges and Innovations in a Community-Based Participatory Randomized Controlled Trial. <i>Health Educ Behav</i> ; 44(1):123-130.                                        | Wrong population   |
| 26 | Gordon JS, Staples JK, Blyta A, Bytyqi M, Wilson AT (2008). Treatment of posttraumatic stress disorder in postwar Kosovar adolescents using mind-body skills groups: a randomized controlled trial. <i>The Journal of clinical psychiatry</i> ; 69(9):1469-76.                                  | Wrong study design |
| 27 | Halvorsen JØ, Stenmark H (2010). Narrative exposure therapy for posttraumatic stress disorder in tortured refugees: a preliminary uncontrolled trial. <i>Scandinavian Journal of Psychology</i> ; 51(6):495-502.                                                                                | Wrong study design |

|    |                                                                                                                                                                                                                                                                                                                                                                                                      |                    |
|----|------------------------------------------------------------------------------------------------------------------------------------------------------------------------------------------------------------------------------------------------------------------------------------------------------------------------------------------------------------------------------------------------------|--------------------|
| 28 | Hijazi AM (2012). Narrative exposure therapy to treat traumatic stress in middle eastern refugees: a clinical trial (Doctoral dissertation, Wayne State University).                                                                                                                                                                                                                                 | Wrong study design |
| 29 | Jespersen KV, Vuust P (2012). The effect of relaxation music listening on sleep quality in traumatized refugees: A pilot study. <i>Journal of music therapy</i> , 49(2),205-229.                                                                                                                                                                                                                     | Wrong population   |
| 30 | Kalantari M, Yule W, Dyregrov A, Neshatdoost H, Ahmadi SJ (2012). Efficacy of writing for recovery on traumatic grief symptoms of Afghani refugee bereaved adolescents: A randomized control trial. <i>OMEGA-Journal of death and dying</i> ; 65(2):139-150                                                                                                                                          | Wrong study design |
| 31 | Kananian S, Ayoughi S, Farugie A, Hinton D, Stangier U (2017). Transdiagnostic culturally adapted CBT with Farsi-speaking refugees: a pilot study. <i>Eur J Psychotraumatol</i> ; 8(sup2):1390362.                                                                                                                                                                                                   | Wrong study design |
| 32 | Kangaslampi S, Garoff F, Peltonen K (2015). Narrative exposure therapy for immigrant children traumatized by war: study protocol for a randomized controlled trial of effectiveness and mechanisms of change. <i>BMC psychiatry</i> ; 15(1),127.                                                                                                                                                     | Wrong population   |
| 33 | Khan MN, Hamdani SU, Chiumento A, Dawson K, Bryant RA, Sijbrandij M, Nazir H, Akhtar P, Masood A, Wang D, Wang E, Uddin I, Ommeren MV, Rahman A (2017). Evaluating feasibility and acceptability of a group WHO trans-diagnostic intervention for women with common mental disorders in rural Pakistan: a cluster randomised controlled feasibility trial. <i>Epidemiol Psychiatr Sci</i> ; 10:1-11. | Wrong population   |
| 34 | Knaevelsrud C, Brand J, Lange A, Ruwaard J, Wagner B (2015). Web-based psychotherapy for posttraumatic stress disorder in war-traumatized Arab patients: randomized controlled trial. <i>J Med Internet Res</i> ;17(3):e71.                                                                                                                                                                          | Wrong population   |
| 35 | Knaevelsrud C, Liedl A, Maercker A (2010). Posttraumatic growth, optimism and openness as outcomes of a cognitive-behavioural intervention for posttraumatic stress reactions. <i>Journal of health psychology</i> ; 15(7):1030-8.                                                                                                                                                                   | Wrong population   |
| 36 | Knaevelsrud C, Maercker A (2007). Internet-based treatment for PTSD reduces distress and facilitates the development of a strong therapeutic alliance: a randomized controlled clinical trial. <i>BMC Psychiatry</i> ; 7,13.                                                                                                                                                                         | Wrong study design |

|    |                                                                                                                                                                                                                                                                                                                                                   |                    |
|----|---------------------------------------------------------------------------------------------------------------------------------------------------------------------------------------------------------------------------------------------------------------------------------------------------------------------------------------------------|--------------------|
| 37 | Kruse J, Joksimovic L, Cavka M, Wöller W, Schmitz N (2009). Effects of trauma-focused psychotherapy upon war refugees. <i>Journal of Traumatic Stress</i> ; 22(6),585-592.                                                                                                                                                                        | Wrong intervention |
| 38 | Kulwicki A, Ballout S (2015). Post Traumatic Stress Disorder (PTSD) in Arab American refugee and recent immigrant women. <i>Journal of Cultural Diversity</i> , 22(1).                                                                                                                                                                            | Wrong study design |
| 39 | Lehning M, Shapiro E, Schreiber M, Hofmann A (2017). Evaluating the EMDR Group Traumatic Episode Protocol With Refugees: A Field Study. <i>Journal of EMDR Practice and Research</i> ; 11(3):129-138.                                                                                                                                             | Wrong population   |
| 40 | McMullen J, O'callaghan P, Shannon C, Black A, Eakin J (2013). Group trauma-focused cognitive-behavioural therapy with former child soldiers and other war-affected boys in the DR Congo: A randomised controlled trial. <i>Journal of Child Psychology and Psychiatry</i> ; 54(11),1231-1241.                                                    | Wrong study design |
| 41 | Meffert SM, Abdo AO, Alla OAA, Elmakki YOM, Omer AA, Yousif S, Metzle TJ, Marmar CR (2014). A pilot randomized controlled trial of interpersonal psychotherapy for Sudanese refugees in Cairo, Egypt. <i>Psychological Trauma: Theory, Research, Practice, and Policy</i> ; 6(3):240.                                                             | Wrong study design |
| 42 | Morath J, Gola H, Sommershof A, Hamuni G, Kolassa S, Catani C, Adenauer H, Ruf-Leuschner M, Schauer M, Elbert T, Groettrup M, Kolassa IT (2014). The effect of trauma-focused therapy on the altered T cell distribution in individuals with PTSD: evidence from a randomized controlled trial. <i>Journal of Psychiatric Research</i> ; 54:1–10. | Wrong population   |
| 43 | Muller J, Karl A, Denke C, Mathier F, Dittmann J, Rohleder N, Knaevelsrud C (2009). Biofeedback for pain management in traumatised refugees. <i>Cogn Behav Ther</i> ; 38(3):184-90.                                                                                                                                                               | Wrong study design |
| 44 | Neuner F, Catani C, Ruf M, Schauer E, Schauer M, Elbert T (2008). Narrative exposure therapy for the treatment of traumatized children and adolescents (KidNET): from neurocognitive theory to field intervention. <i>Child and adolescent psychiatric clinics of North America</i> ; 17(3),641-664.                                              | Wrong population   |
| 45 | Nickerson A, Byrow Y, Pajak R, McMahon T, Bryant RA, Christensen H, Liddell BJ (2019). 'Tell Your Story': a randomized controlled trial of an online intervention to reduce mental health stigma and increase help-seeking in refugee men with posttraumatic stress. <i>Psychol Med</i> ; 1-12.                                                   | Wrong study design |

|    |                                                                                                                                                                                                                                                                                                           |                    |
|----|-----------------------------------------------------------------------------------------------------------------------------------------------------------------------------------------------------------------------------------------------------------------------------------------------------------|--------------------|
| 46 | Nordbrandt MS, Carlsson J, Lindberg LG, Sandahl H, Mortensen EL (2015). Treatment of traumatised refugees with basic body awareness therapy versus mixed physical activity as add-on treatment: Study protocol of a randomised controlled trial. <i>Trials</i> ; 16(1),477.                               | Wrong population   |
| 47 | Northwood AK, Vukovich MM, Beckman A, Walter JP, Josiah N, Hudak L, O'Donnell Burrows K, Letts JP, Danner CC. Intensive psychotherapy and case management for Karen refugees with major depression in primary care: a pragmatic randomized control trial. <i>BMC Fam Pract</i> . 2020 Jan 28;21(1):17.    | Wrong population   |
| 48 | Onyut LP, Neuner F, Schauer E, Ertl V, Odenwald M, Schauer M, Elbert T (2004). The Nakivale Camp Mental Health Project: Building local competency for psychological assistance to traumatised refugees. <i>Intervention</i> ; 2(2),90-107.                                                                | Wrong population   |
| 49 | Ooi CS, Rooney RM, Roberts C, Kane RT, Wright B, Chatzisarantis N (2016). The efficacy of a group cognitive behavioral therapy for war affected young migrants living in Australia: A cluster randomized controlled trial. <i>Front Psychol</i> ; 7:1641.                                                 | Wrong study design |
| 50 | Palic S, Elklit A (2009). An explorative outcome study of CBT-based multidisciplinary treatment in a diverse group of refugees from a Danish treatment centre for rehabilitation of traumatized refugees. <i>Torture</i> ; 19(3):248-70.                                                                  | Wrong population   |
| 51 | Panter-Brick C, Dajani R, Eggerman M, Hermosilla S, Sancilio A, Ager A (2017). Insecurity, distress and mental health: experimental and randomized controlled trials of a psychosocial intervention for youth affected by the Syrian crisis. <i>J Child Psychol Psychiatry</i> ; doi: 10.1111/jcpp.12832. | Wrong study design |
| 52 | Peltonen K, Kangaslampi S (2019). Treating children and adolescents with multiple traumas: a randomized clinical trial of narrative exposure therapy. <i>Eur J Psychotraumatol</i> ;10(1):1558708.                                                                                                        | Wrong study design |
| 53 | Pfeiffer E, Sachser C, Rohlmann F, Goldbeck L (2018). Effectiveness of a trauma-focused group intervention for young refugees: a randomized controlled trial. <i>J Child Psychol Psychiatry</i> ;59(11):1171-1179.                                                                                        | Wrong population   |
| 54 | Quinlan R, Schweitzer RD, Khawaja N, Griffin J (2016). Evaluation of a school-based creative arts therapy program for adolescents from refugee backgrounds. <i>The Arts in Psychotherapy</i> ; 47,72-78.                                                                                                  | Wrong population   |

|    |                                                                                                                                                                                                                                                                                                                                                                       |                    |
|----|-----------------------------------------------------------------------------------------------------------------------------------------------------------------------------------------------------------------------------------------------------------------------------------------------------------------------------------------------------------------------|--------------------|
| 55 | Rahman A, Hamdani SU, Awan NR, Bryant RA, Dawson KS, Khan MF, Azeemi MM, Akhtar P, Nazir H, Chiumento A, Sijbrandij M, Wang D, Farooq S, van Ommeren M (2016). Effect of a Multicomponent Behavioral Intervention in Adults Impaired by Psychological Distress in a Conflict Affected Area of Pakistan: A Randomized Clinical Trial. <i>JAMA</i> ; 316(24):2609-2617. | Wrong population   |
| 56 | Rees B, Travis F, Shapiro D, Chant R (2013). Reduction in posttraumatic stress symptoms in Congolese refugees practicing transcendental meditation. <i>Journal of traumatic stress</i> ; 26(2),295-298.                                                                                                                                                               | Wrong population   |
| 57 | Renner W (2009). The effectiveness of psychotherapy with refugees and asylum seekers: preliminary results from an Austrian study. <i>Journal of Immigrant and Minority Health</i> ; 11(1):41-5.                                                                                                                                                                       | Wrong population   |
| 58 | Renner W, Bänninger-Huber E, Peltzer K (2011). Culture-Sensitive and Resource Oriented Peer (CROP)- Groups as a community based intervention for trauma survivors: A randomized controlled pilot study with refugees and asylum seekers from Chechnya. <i>Australasian Journal of Disaster and Trauma Studies</i> ; 1:1–13                                            | Wrong intervention |
| 59 | Rousseau C, Benoit M, Gauthier MF, Lacroix L, Alain N, Rojas MV, Moran A, Bourassa D (2007). Classroom drama therapy program for immigrant and refugee adolescents: A pilot study. <i>Clinical child psychology and psychiatry</i> ; 12(3),451-465.                                                                                                                   | Wrong intervention |
| 60 | Rousseau C, Beauregard C, Daignault K, Petrakos H4, Thombs BD, Steele R, Vasiliadis HM, Hechtman L (2014). A cluster randomized-controlled trial of a classroom-based drama workshop program to improve mental health outcomes among immigrant and refugee youth in special classes. <i>PLoS one</i> ; 9(8),e104704.                                                  | Wrong population   |
| 61 | Ruf M, Schauer M, Neuner F, Catani C, Schauer E, Elbert T (2010). Narrative exposure therapy for 7-to 16-year-olds: A randomized controlled trial with traumatized refugee children. <i>Journal of traumatic stress</i> ; 23(4):437-445.                                                                                                                              | Wrong population   |
| 62 | Schaal S, Elbert T, Neuner F (2009). Narrative exposure therapy versus interpersonal psychotherapy. <i>Psychotherapy and psychosomatics</i> ; 78(5),298-306.                                                                                                                                                                                                          | Wrong study design |
| 63 | Schottelkorb AA, Dumas DM, Garcia R (2012). Treatment for childhood refugee trauma: A randomized, controlled trial. <i>International Journal of Play Therapy</i> ; 21(2),57.                                                                                                                                                                                          | Wrong study design |

|    |                                                                                                                                                                                                                                                                                                                                                             |                    |
|----|-------------------------------------------------------------------------------------------------------------------------------------------------------------------------------------------------------------------------------------------------------------------------------------------------------------------------------------------------------------|--------------------|
| 64 | Smajkić A, Weine S, Durić-Bijedić Z, Boskailo E, Lewis J, Pavković I (2001). Sertraline, paroxetine and venlafaxine in refugee post traumatic stress disorder with depression symptoms. <i>Medicinski arhiv</i> ; 55(1 Suppl 1).                                                                                                                            | Wrong intervention |
| 65 | Sonne C, Carlsson J, Bech P, Elklit A, Mortensen EL (2016). Treatment of trauma-affected refugees with venlafaxine versus sertraline combined with psychotherapy-a randomised study. <i>BMC psychiatry</i> ; 16(1), 383.                                                                                                                                    | Wrong population   |
| 66 | Stein BD, Jaycox LH, Kataoka SH, Wong M, Tu W, Elliott MN, Fink A (2003). A mental health intervention for schoolchildren exposed to violence: A randomized controlled trial. <i>Jama</i> ; 290(5),603-611.                                                                                                                                                 | Wrong population   |
| 67 | Steinert C, Bumke PJ, Hollekamp RL, Larisch A, Leichsenring F, Mattheß H, Sek S, Sodemann U, Stingl M, Ret T, Vojtová H, Wöller W, Kruse J (2017). Resource activation for treating post-traumatic stress disorder, co-morbid symptoms and impaired functioning: a randomized controlled trial in Cambodia. <i>Psychological medicine</i> ; 47(3), 553-564. | Wrong study design |
| 68 | Stenmark H, Catani C, Elbert T, Gøtestam KG (2008). Narrative Exposure Therapy compared to treatment as usual for refugees with PTSD-Preliminary results from a randomized controlled trial. <i>European Psychiatry</i> ; 23, S90.                                                                                                                          | Wrong population   |
| 69 | Vijayakumar L, Mohanraj R, Kumar S, Jeyaseelan V, Sriram S, Shanmugam M (2017). CASP - An intervention by community volunteers to reduce suicidal behaviour among refugees. <i>Int J Soc Psychiatry</i> ; 63(7):589-597.                                                                                                                                    | Wrong study design |
| 70 | Weinstein N, Khabbaz F, Legate N. Enhancing need satisfaction to reduce psychological distress in Syrian refugees (2016). <i>J Consult Clin Psychol</i> ; 84(7):645-50.                                                                                                                                                                                     | Wrong population   |
| 71 | Weiss WM, Murray LK, Zangana GA, Mahmooth Z, Kaysen D, Dorsey S, Lindgren K, Gross A, Murray SM, Bass JK, Bolton P (2015). Community-based mental health treatments for survivors of torture and militant attacks in Southern Iraq: a randomized control trial. <i>BMC psychiatry</i> ; 15(1),249.                                                          | Wrong outcome      |
| 72 | Yeomans PD, Forman EM, Herbert JD, Yuen E (2010). A randomized trial of a reconciliation workshop with and without PTSD psychoeducation in Burundian sample. <i>Journal of traumatic stress</i> ; 23(3),305-312.                                                                                                                                            | Wrong population   |



### Studies awaiting assessment and ongoing

1. Beck BD, Lund ST, Sjøgaard U, Simonsen E, Tellier TC, Cordtz TO, Laier GH, Moe T (2018). Music therapy versus treatment as usual for refugees diagnosed with posttraumatic stress disorder (PTSD): study protocol for a randomized controlled trial. *Trials*; 19(1):301.
2. Golchert J, Roehr S, Berg F, Grochtdreis T, Hoffmann R, Jung F, Nagl M, Plexnies A, Renner A, König HH, Kersting A, Riedel-Heller SG (2019). HELP@APP: development and evaluation of a self-help app for traumatized Syrian refugees in Germany – a study protocol of a randomized controlled trial. *BMC Psychiatry*; 19(1):131.
3. Hasha W, Fadnes LT, Igland J, Vårdal R, Giusti LM, Strømme EM, Haj-Younes J, Heltne U, Kumar BN, Diaz E (2019). Two interventions to treat pain disorders and post-traumatic symptoms among Syrian refugees: protocol for a randomized controlled trial. *Trials*; 20(1):784.
4. Knefel M, Kantor V, Nicholson AA, Schiess-Jokanovic J, Weindl D, Schäfer I, Lueger-Schuster B (2020). A brief transdiagnostic psychological intervention for Afghan asylum seekers and refugees in Austria: a randomized controlled trial. *Trials*; 21(1):57.
5. Purgato M, Carswell K, Acarturk C, Au T, Akbai S, Anttila M, Baumgartner J, Bailey D, Biondi M, Bird M, Churchill R, Eskici S, Hansen LJ, Heron P, Ilkkursun Z, Kilian R, Koesters M, Lantta T, Nose M, Ostuzzi G, Papola D, Popa M, Sijbrandij M, Tarsitani L, Tedeschi F, Turrini G, Uygun E, Valimaki MA, Wancata J, White R, Zanini E, Cuijpers P, Barbui C, Van Ommeren M (2019). Effectiveness and cost-effectiveness of self-help plus (SH+) for preventing mental disorders in refugees and asylum seekers in Europe and Turkey: study protocols for two randomised controlled trials. *BMJ open*; 9(5):e030259.
6. Sandahl H, Jennum P, Baandrup L, Poschmann IS, Carlsson J (2017). Treatment of sleep disturbances in trauma-affected refugees: Study protocol for a randomised controlled trial. *Trials*; 18(1):520.
7. Sijbrandij M, Acarturk C, Bird M, Bryant RA, Burchert S, Carswell K, de Jong J, Dinesen C, Dawson KS, El Chammay R, van Ittersum L, Jordans M, Knaevelsrud C, McDaid D, Miller K, Morina N, Park AL, Roberts B, van Son Y, Sondorp E, Pfaltz MC, Ruttenberg L, Schick M, Schnyder U, van Ommeren M, Ventevogel P, Weissbecker I, Weitz E, Wiedemann N, Whitney C, Cuijpers P (2017). Strengthening mental health care systems for Syrian refugees in Europe and the Middle East: integrating scalable psychological interventions in eight countries. *Eur J Psychotraumatol*; 8(sup2):1388102.
8. de Graaff AM, Cuijpers P, Acarturk C, Bryant R, Burchert S, Fuhr DC, Huizink AC, de Jong J, Kieft B, Knaevelsrud C, McDaid D, Morina N, Park AL, Uppendahl J, Ventevogel P, Whitney C, Wiedemann N, Woodward A, Sijbrandij M (2020). Effectiveness of a peer-refugee delivered psychological intervention to reduce psychological distress among adult Syrian refugees in the Netherlands: study protocol. *Eur J Psychotraumatol*; 11(1):1694347.
9. ISRCTN15214107. Pilot trial of an evidence-based low intensity psychosocial intervention delivered by lay therapists for asylum seekers and refugees. <https://doi.org/10.1186/ISRCTN15214107>
10. NCT03830008. Scaling-up Psychological Interventions With Syrian Refugees in Switzerland. <https://clinicaltrials.gov/show/NCT03830008>

## Risk of bias of included studies

Risk of bias summary: review authors' judgements about each risk of bias item for each included study.

|                      | Random sequence generation (selection bias) | Allocation concealment (selection bias) | Blinding of participants and personnel (performance bias) | Blinding of outcome assessment (detection bias) | Incomplete outcome data (attrition bias) | Selective reporting (reporting bias) | Other bias |
|----------------------|---------------------------------------------|-----------------------------------------|-----------------------------------------------------------|-------------------------------------------------|------------------------------------------|--------------------------------------|------------|
| Acarturk 2015        | +                                           | ?                                       | ?                                                         | +                                               | +                                        | +                                    | +          |
| Acarturk 2016        | +                                           | +                                       | ?                                                         | +                                               | -                                        | +                                    | +          |
| Adenauer 2011        | +                                           | ?                                       | ?                                                         | +                                               | +                                        | +                                    | ?          |
| Buhmann 2016         | +                                           | +                                       | ?                                                         | +                                               | ?                                        | +                                    | +          |
| Carlsson 2018        | +                                           | +                                       | ?                                                         | +                                               | +                                        | +                                    | +          |
| Hensel-Dittmann 2011 | +                                           | ?                                       | ?                                                         | +                                               | -                                        | ?                                    | ?          |
| Hijazi 2014          | +                                           | +                                       | ?                                                         | -                                               | +                                        | +                                    | +          |
| Hinton 2004          | +                                           | ?                                       | ?                                                         | -                                               | ?                                        | +                                    | -          |
| Hinton 2005          | +                                           | ?                                       | ?                                                         | +                                               | +                                        | +                                    | +          |
| Hinton 2009          | +                                           | ?                                       | ?                                                         | +                                               | +                                        | +                                    | -          |
| Liedl 2011           | +                                           | ?                                       | ?                                                         | -                                               | +                                        | +                                    | -          |
| Neuner 2004_1        | +                                           | ?                                       | ?                                                         | ?                                               | ?                                        | +                                    | ?          |
| Neuner 2004_2        | +                                           | ?                                       | ?                                                         | ?                                               | ?                                        | +                                    | ?          |
| Neuner 2008_1        | +                                           | ?                                       | ?                                                         | +                                               | -                                        | +                                    | ?          |
| Neuner 2008_2        | +                                           | ?                                       | ?                                                         | +                                               | -                                        | +                                    | ?          |
| Neuner 2010          | +                                           | ?                                       | ?                                                         | +                                               | ?                                        | +                                    | ?          |
| Otto 2003            | +                                           | ?                                       | ?                                                         | -                                               | ?                                        | ?                                    | +          |
| Paunovic 2001        | +                                           | ?                                       | ?                                                         | -                                               | -                                        | +                                    | ?          |
| Shaw 2018            | +                                           | ?                                       | ?                                                         | -                                               | +                                        | +                                    | ?          |
| Stenmark 2013        | +                                           | ?                                       | ?                                                         | +                                               | -                                        | -                                    | ?          |
| Ter Heide 2011       | +                                           | +                                       | ?                                                         | +                                               | -                                        | +                                    | +          |
| Ter Heide 2016       | +                                           | +                                       | ?                                                         | +                                               | -                                        | +                                    | +          |
| Tol 2020             | +                                           | +                                       | ?                                                         | +                                               | +                                        | +                                    | +          |
| Weine 2008           | +                                           | ?                                       | ?                                                         | -                                               | ?                                        | -                                    | ?          |
| Yurtsever 2018       | +                                           | ?                                       | ?                                                         | +                                               | -                                        | +                                    | +          |

Risk of bias graph: review authors' judgements about each risk of bias item presented as percentages across all included studies.

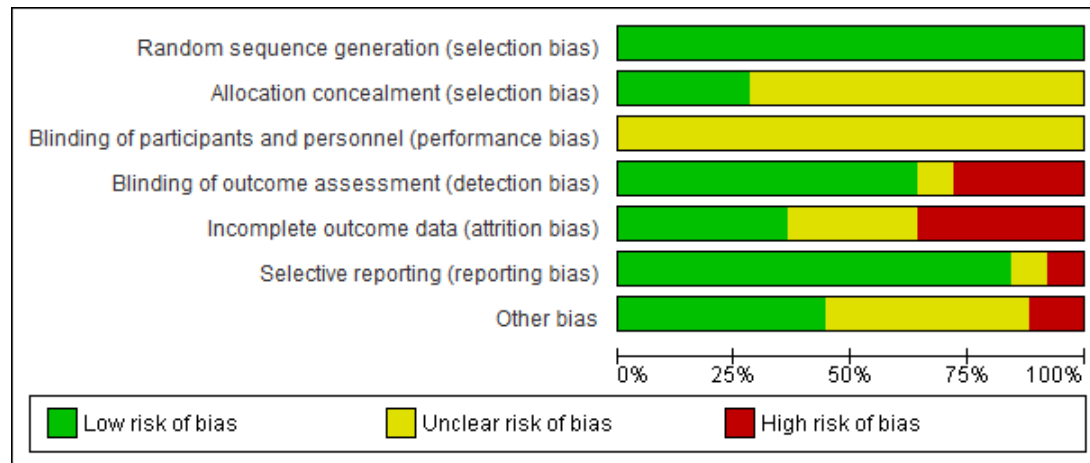

### Risk of bias tables

#### Acarturk 2015

| Bias                                                      | Authors' judgement | Support for judgement                                                                                                                                                                                                                                            |
|-----------------------------------------------------------|--------------------|------------------------------------------------------------------------------------------------------------------------------------------------------------------------------------------------------------------------------------------------------------------|
| Random sequence generation (selection bias)               | Low risk           | QUOTE: "The selection was conducted by using a computer-generated random number list. [...] Participants were randomly assigned on a 1:1 basis to the EMDR or wait-list group". Difference in the average baseline value across treatment arms: ratio above 1.1. |
| Allocation concealment (selection bias)                   | Unclear risk       | No details provided.                                                                                                                                                                                                                                             |
| Blinding of participants and personnel (performance bias) | Unclear risk       | Blinding patients and therapists in psychotherapy is not possible                                                                                                                                                                                                |
| Blinding of outcome assessment (detection bias)           | Low risk           | QUOTE: "[...] the outcome assessors were kept blind to the allocation".                                                                                                                                                                                          |
| Incomplete outcome data (attrition bias)                  | Low risk           | All randomised patients completed the study and there were no missing data. Results were reported for all randomised patients.                                                                                                                                   |
| Selective reporting (reporting bias)                      | Low risk           | Protocol is not available, however all expected outcomes were clearly reported at post-treatment and follow-up.                                                                                                                                                  |
| Other bias                                                | Low risk           | All participants were Syrian and all interviews were carried out in the local language, with the help of Syrian interpreters. The measures were translated into Arabic. Sponsorship bias is unlikely to have occurred.                                           |

#### Acarturk 2016

| Bias                                        | Authors' judgement | Support for judgement                                                                                                                                                                                           |
|---------------------------------------------|--------------------|-----------------------------------------------------------------------------------------------------------------------------------------------------------------------------------------------------------------|
| Random sequence generation (selection bias) | Low risk           | QUOTE: "Participants were randomly assigned on a 1:1 basis to the EMDR or wait-list group".                                                                                                                     |
| Allocation concealment (selection bias)     | Low risk           | QUOTE: "After including the participants, another researcher, not involved in the current study, used a computergenerated random-number list for the allocation of participants to different treatment groups". |

|                                                           |              |                                                                                                                                                                                                                                                                                                                                                                                                                                                                                                                                                                                                         |
|-----------------------------------------------------------|--------------|---------------------------------------------------------------------------------------------------------------------------------------------------------------------------------------------------------------------------------------------------------------------------------------------------------------------------------------------------------------------------------------------------------------------------------------------------------------------------------------------------------------------------------------------------------------------------------------------------------|
| Blinding of participants and personnel (performance bias) | Unclear risk | Blinding patients and therapists in psychotherapy is not possible                                                                                                                                                                                                                                                                                                                                                                                                                                                                                                                                       |
| Blinding of outcome assessment (detection bias)           | Low risk     | QUOTE: "[...] the outcome assessors were kept blind to the allocation".                                                                                                                                                                                                                                                                                                                                                                                                                                                                                                                                 |
| Incomplete outcome data (attrition bias)                  | High risk    | Dropouts were high in the two groups: 18/49 (36.73%) in EMDR group and 16/49 (32.65%) in WL group. An intent-to-treat was performed, quote: "provide a robust test of the efficacy of the treatment, and to follow the intention-to-treat principles of data analysis, the missing data points in the $\pm 2$ analyses were replaced with values that would indicate that drop-outs retained the diagnosis of trauma after the intervention." Analysis were apparently performed on all randomized patients and authors stated that the completers' analyses of the measures produced the same results. |
| Selective reporting (reporting bias)                      | Low risk     | All outcomes were clearly pre-specified in the protocol and were well reported at post-treatment and follow-up.                                                                                                                                                                                                                                                                                                                                                                                                                                                                                         |
| Other bias                                                | Low risk     | All participants were Syrian and all interviews were carried out in the local language, with the help of Syrian interpreters. The measures were translated into Arabic. Sponsorship bias is unlikely to have occurred.                                                                                                                                                                                                                                                                                                                                                                                  |

## Adenauer 2011

| Bias                                                      | Authors' judgement | Support for judgement                                                                                                                                                                                                                               |
|-----------------------------------------------------------|--------------------|-----------------------------------------------------------------------------------------------------------------------------------------------------------------------------------------------------------------------------------------------------|
| Random sequence generation (selection bias)               | Low risk           | Quote: "participants... were randomised using a computer-generated list of random numbers". Difference in the average baseline value across treatment arms: ratio above 1.1.                                                                        |
| Allocation concealment (selection bias)                   | Unclear risk       | No details provided.                                                                                                                                                                                                                                |
| Blinding of participants and personnel (performance bias) | Unclear risk       | Blinding patients and therapists in psychotherapy is not possible                                                                                                                                                                                   |
| Blinding of outcome assessment (detection bias)           | Low risk           | Post test were carried out by interviewers who were blind to treatment condition.                                                                                                                                                                   |
| Incomplete outcome data (attrition bias)                  | Low risk           | Analysis carried out only on completers; however, the number of dropout is very low, balanced across intervention groups with similar reasons for missing data across groups, that are not related to the outcome (patients moved for deportation). |
| Selective reporting (reporting bias)                      | Low risk           | All outcomes were clearly pre-specified in the protocol and were clearly reported in the paper.                                                                                                                                                     |
| Other bias                                                | Unclear risk       | NET was carried out with the help of interpreters if necessary. Two of the authors of the paper are authors of the NET manual. Sponsorship bias cannot be ruled out.                                                                                |

## Buhmann 2016

| Bias                                                      | Authors' judgement | Support for judgement                                                                                                                                                                                                                                                                                                                                                                                                                          |
|-----------------------------------------------------------|--------------------|------------------------------------------------------------------------------------------------------------------------------------------------------------------------------------------------------------------------------------------------------------------------------------------------------------------------------------------------------------------------------------------------------------------------------------------------|
| Random sequence generation (selection bias)               | Low risk           | QUOTE: "the randomisation sequence was computer generated by the Department of Biostatistics at University of Copenhagen, which was not otherwise involved in the research project. Randomisation was stratified by gender and total score on HTQ, so that patients with equal illness severity were allocated to all groups".                                                                                                                 |
| Allocation concealment (selection bias)                   | Low risk           | QUOTE: "allocation was concealed by using sequentially numbered sealed envelopes. The envelopes were kept in an office physically separate from the clinic and were administered by secretaries who were not associated with the research project. When a patient had been included in the trial, the physician telephoned the office administering the randomisation envelopes and patients were subsequently assigned to a treatment group." |
| Blinding of participants and personnel (performance bias) | Unclear risk       | Blinding patients and therapists in psychotherapy is not possible                                                                                                                                                                                                                                                                                                                                                                              |

|                                                 |              |                                                                                                                                                                                                                                                                                                                                                                                    |
|-------------------------------------------------|--------------|------------------------------------------------------------------------------------------------------------------------------------------------------------------------------------------------------------------------------------------------------------------------------------------------------------------------------------------------------------------------------------|
| Blinding of outcome assessment (detection bias) | High risk    | QUOTE: "A masked outcome measure was obtained by rating all patients with HRSD and HRSA at baseline and follow-up. No similar observer-rating existed for PTSD".                                                                                                                                                                                                                   |
| Incomplete outcome data (attrition bias)        | Unclear risk | Missing data have been imputed using appropriated method (full information maximum likelihood- FIML); however, number of patients included in the analyses correspondes to completers only. Data on drop out rates are unclear.                                                                                                                                                    |
| Selective reporting (reporting bias)            | Low risk     | All expected outcomes were clearly pre-specified in the protocol and well reported in the paper.                                                                                                                                                                                                                                                                                   |
| Other bias                                      | Low risk     | QUOTE: "All self-report questionnaires were available in the six most common languages at the clinic, which included the languages of 92% of patients. If no translation was available, an interpreter translated the official version into the language of the patient." The trial was funded by the capital region of Copenhagen. Sponsorship bias is unlikely to have occurred. |

## Carlsson 2018

| Bias                                                      | Authors' judgement | Support for judgement                                                                                                                                                                                                                                                                                                                                                                                                                 |
|-----------------------------------------------------------|--------------------|---------------------------------------------------------------------------------------------------------------------------------------------------------------------------------------------------------------------------------------------------------------------------------------------------------------------------------------------------------------------------------------------------------------------------------------|
| Random sequence generation (selection bias)               | Low risk           | QUOTE: "A computer-generated randomisation sequence was obtained from the Department of Biostatistics at the University of Copenhagen".                                                                                                                                                                                                                                                                                               |
| Allocation concealment (selection bias)                   | Low risk           | QUOTE: "Allocation was concealed by using sequentially numbered sealed envelopes".                                                                                                                                                                                                                                                                                                                                                    |
| Blinding of participants and personnel (performance bias) | Unclear risk       | Blinding patients and therapists in psychotherapy is not possible                                                                                                                                                                                                                                                                                                                                                                     |
| Blinding of outcome assessment (detection bias)           | Low risk           | QUOTE: "The measures were all self-report [...] the HAM-D and HAM-A, which were completed by raters blinded to the time of the interview. [...] If the participants did not understand any of the above mentioned languages, the questionnaires were translated by an interpreter during the session. If the participants were illiterate, an interpreter assisted with reading the questionnaires".                                  |
| Incomplete outcome data (attrition bias)                  | Low risk           | Missing outcome data were low and balanced in numbers across intervention groups. The analysis were intent-to-treat: QUOTE: "To conduct intention-to-treat analyses the regression analyses were conducted using Full Information Maximum Likelihood".                                                                                                                                                                                |
| Selective reporting (reporting bias)                      | Low risk           | All expected outcomes were clearly pre-specified in the protocol and well reported in the paper.                                                                                                                                                                                                                                                                                                                                      |
| Other bias                                                | Low risk           | QUOTE: "All self-administered questionnaires were available in 5 languages: If the participants did not understand any of the above mentioned languages, the questionnaires were translated by an interpreter during the session. If the participants were illiterate, an interpreter assisted with reading the questionnaires". The study was funded by TrygFonden (J.nr. 7-10-1002). Sponsorship bias is unlikely to have occurred. |

## Hensel-Dittmann 2011

| Bias                                                      | Authors' judgement | Support for judgement                                                                                                                                                                                                                                                                       |
|-----------------------------------------------------------|--------------------|---------------------------------------------------------------------------------------------------------------------------------------------------------------------------------------------------------------------------------------------------------------------------------------------|
| Random sequence generation (selection bias)               | Low risk           | QUOTE: "Subjects were randomly assigned to either NET or SIT. Participants were matched pairwise according to gender, age, and region of origin and were then allocated to NET or SIT by flipping a coin." Difference in the average baseline value across treatment arms: ratio above 1.1. |
| Allocation concealment (selection bias)                   | Unclear risk       | No information provided                                                                                                                                                                                                                                                                     |
| Blinding of participants and personnel (performance bias) | Unclear risk       | Personnel cannot be blind for this type of treatment. QUOTE: "In order to avoid any therapist effects, each therapist was involved in NET and SIT treatments. Treatment was usually carried out by 1 therapist, with 1 trainee therapist observing and assisting in the sessions".          |
| Blinding of outcome assessment (detection bias)           | Low risk           | QUOTE: "We aimed to keep the assessors blind to the treatment conditions of the subjects; however, occasionally the treatment condition was revealed to the rater by responses from the patient".                                                                                           |

|                                          |              |                                                                                                                                                                                                                                                                                            |
|------------------------------------------|--------------|--------------------------------------------------------------------------------------------------------------------------------------------------------------------------------------------------------------------------------------------------------------------------------------------|
| Incomplete outcome data (attrition bias) | High risk    | QUOTE: "Aiming at an intention-to-treat analysis, all subjects who were randomized were included in the outcome analysis. [...] we used mixed effects models". High dropout rate at the end of the study: 8/15 in NET group and 7/13 in SIT group.                                         |
| Selective reporting (reporting bias)     | Unclear risk | Protocol is not available. All expected outcomes were clearly reported at post-treatment and follow-up. Socio-demographic information were not reported.                                                                                                                                   |
| Other bias                               | Unclear risk | QUOTE: "In 17 cases, we conducted the treatment with the aid of trained interpreters [...]" Two of the authors of the paper are authors of the NET manual. Sponsorship bias cannot be ruled out. Study was supported by the European Refugee Fund and the Deutsche Forschungsgemeinschaft. |

## Hijazi 2014

| Bias                                                      | Authors' judgement | Support for judgement                                                                                                                                                                                                                                                                                                                                                                      |
|-----------------------------------------------------------|--------------------|--------------------------------------------------------------------------------------------------------------------------------------------------------------------------------------------------------------------------------------------------------------------------------------------------------------------------------------------------------------------------------------------|
| Random sequence generation (selection bias)               | Low risk           | QUOTE: "the computerized scheme was stratified by recruitment site (agency) and assistance, and randomised the two conditions in blocks of six in a 2:1 ratio".                                                                                                                                                                                                                            |
| Allocation concealment (selection bias)                   | Low risk           | QUOTE: "the assistant (heretofore blind to condition assignment) opened a sealed envelope and informed the participants when he or she would be getting the treatment".                                                                                                                                                                                                                    |
| Blinding of participants and personnel (performance bias) | Unclear risk       | Blinding patients and therapists in psychotherapy is not possible                                                                                                                                                                                                                                                                                                                          |
| Blinding of outcome assessment (detection bias)           | High risk          | Self-report measures were mailed to participants who completed independently without interpreters. QUOTE: "all participants were mailed follow up assessment measure and returned envelopes 2 and 4 months after measure".                                                                                                                                                                 |
| Incomplete outcome data (attrition bias)                  | Low risk           | QUOTE: "our primary analyses were intent-to-treat, meaning that we retained all 36 participants, regardless of how many intervention or follow-up assessment sessions they completed. Any missing follow-up data were replaced using the multiple imputation procedure in SPSS."                                                                                                           |
| Selective reporting (reporting bias)                      | Low risk           | All expected outcomes were clearly pre-specified in the protocol and well reported in the paper at all FUs.                                                                                                                                                                                                                                                                                |
| Other bias                                                | Low risk           | The personnel were Arabic-speaking as the participants and the measures were translated into Arabic and most of the translated versions were validated. This research was supported by the Blue Cross Blue Shield of Michigan Foundation and award RO1 057808 from the National Institute of Arthritis, Musculoskeletal, and Skin Diseases. Sponsorship bias is unlikely to have occurred. |

## Hinton 2004

| Bias                                                      | Authors' judgement | Support for judgement                                                                                                                                                                                                          |
|-----------------------------------------------------------|--------------------|--------------------------------------------------------------------------------------------------------------------------------------------------------------------------------------------------------------------------------|
| Random sequence generation (selection bias)               | Low risk           | QUOTE: "the patients were randomly assigned to two cohorts of 6 each". No further details provided.                                                                                                                            |
| Allocation concealment (selection bias)                   | Unclear risk       | No information provided.                                                                                                                                                                                                       |
| Blinding of participants and personnel (performance bias) | Unclear risk       | Blinding patients and therapists in psychotherapy is not possible                                                                                                                                                              |
| Blinding of outcome assessment (detection bias)           | High risk          | Measures were self administered by the patients.                                                                                                                                                                               |
| Incomplete outcome data (attrition bias)                  | Unclear risk       | Data are provided for all randomised patients. No details provided on drop-out and eventual methods to impute missing data.                                                                                                    |
| Selective reporting (reporting bias)                      | Low risk           | Protocol is not available, however all expected outcomes were clearly reported at all follow-up.                                                                                                                               |
| Other bias                                                | High risk          | The first author led the CBT sessions. Vietnamese social workers and staff provided translation and cultural consultation; all patients were Vietnamese; the measures were translated and validated for Vietnamese population. |

## Hinton 2005

| Bias                                                      | Authors' judgement | Support for judgement                                                                                                                                               |
|-----------------------------------------------------------|--------------------|---------------------------------------------------------------------------------------------------------------------------------------------------------------------|
| Random sequence generation (selection bias)               | Low risk           | QUOTE: "patients... were stratified by gender, with random allocation to either the Initial treatment, or the Delayed Treatment Groups decided by a coin toss".     |
| Allocation concealment (selection bias)                   | Unclear risk       | No information provided.                                                                                                                                            |
| Blinding of participants and personnel (performance bias) | Unclear risk       | Blinding patients and therapists in psychotherapy is not possible                                                                                                   |
| Blinding of outcome assessment (detection bias)           | Low risk           | QUOTE: "blind to treatment condition, all assessments were made by a Cambodian bicultural worker".                                                                  |
| Incomplete outcome data (attrition bias)                  | Low risk           | Data are provided for all randomised patients; all randomised patients completed the study and there were no missing data.                                          |
| Selective reporting (reporting bias)                      | Low risk           | Protocol is not available, however all expected outcomes were clearly reported at all follow-up.                                                                    |
| Other bias                                                | High risk          | All patients were Cambodian and CBT sessions were conducted by the first author because fluent in Cambodian; all measures were translated and then back-translated. |

## Hinton 2009

| Bias                                                      | Authors' judgement | Support for judgement                                                                                                                                                 |
|-----------------------------------------------------------|--------------------|-----------------------------------------------------------------------------------------------------------------------------------------------------------------------|
| Random sequence generation (selection bias)               | Low risk           | QUOTE: "Eligible patients who agreed to participate were stratified by gender, with random allocation to either initial or delayed treatment decided by a coin toss". |
| Allocation concealment (selection bias)                   | Unclear risk       | No information provided.                                                                                                                                              |
| Blinding of participants and personnel (performance bias) | Unclear risk       | Blinding patients and therapists in psychotherapy is not possible                                                                                                     |
| Blinding of outcome assessment (detection bias)           | Low risk           | QUOTE: "Blind to treatment condition, all assessments were made by a Cambodian bicultural worker".                                                                    |
| Incomplete outcome data (attrition bias)                  | Low risk           | Data are provided for all randomised patients; all randomised patients completed the study and there were no missing data.                                            |
| Selective reporting (reporting bias)                      | Low risk           | Protocol is not available. All expected outcomes were clearly reported at all time points.                                                                            |
| Other bias                                                | High risk          | The first author, who is fluent in Cambodian, conducted or co-led the intervention. No information provided about the sponsorship.                                    |

## Liedl 2011

| Bias                                        | Authors' judgement | Support for judgement                                                                                                                                      |
|---------------------------------------------|--------------------|------------------------------------------------------------------------------------------------------------------------------------------------------------|
| Random sequence generation (selection bias) | Low risk           | QUOTE: "...were randomly assigned to one of the three conditions".<br><br>Difference in the average baseline value across treatment arms: ratio above 1.1. |
| Allocation concealment (selection bias)     | Unclear risk       | No information provided.                                                                                                                                   |

|                                                           |              |                                                                                                                                                                            |
|-----------------------------------------------------------|--------------|----------------------------------------------------------------------------------------------------------------------------------------------------------------------------|
| Blinding of participants and personnel (performance bias) | Unclear risk | Blinding patients and therapists in psychotherapy is not possible                                                                                                          |
| Blinding of outcome assessment (detection bias)           | High risk    | QUOTE: "The questionnaire were administered using multilingual computer assisted self interview [...]"                                                                     |
| Incomplete outcome data (attrition bias)                  | Low risk     | Only completers data were analysed; missing outcome data were low and balanced in numbers across intervention groups, with similar reasons for missing data across groups. |
| Selective reporting (reporting bias)                      | Low risk     | Protocol is not available. All expected outcomes were clearly reported.                                                                                                    |
| Other bias                                                | High risk    | QUOTE: "wherever possible, we used validated version of the questionnaire in the participants native languages". Paper was retracted and the reasons are unknown.          |

## Neuner 2004

| Bias                                                      | Authors' judgement | Support for judgement                                                                                                                                                                                                                                                                                                                         |
|-----------------------------------------------------------|--------------------|-----------------------------------------------------------------------------------------------------------------------------------------------------------------------------------------------------------------------------------------------------------------------------------------------------------------------------------------------|
| Random sequence generation (selection bias)               | Low risk           | QUOTE: "Each participant was randomly assigned (using a dice) to one of three treatment groups: narrative exposure therapy, supportive counseling, or psychoeducation only". Difference in the average baseline value across treatment arms: ratio above 1.1.                                                                                 |
| Allocation concealment (selection bias)                   | Unclear risk       | No details provided.                                                                                                                                                                                                                                                                                                                          |
| Blinding of participants and personnel (performance bias) | Unclear risk       | Blinding patients and therapists in psychotherapy is not possible                                                                                                                                                                                                                                                                             |
| Blinding of outcome assessment (detection bias)           | Low risk           | QUOTE: "The local and expert interviewers who carried out the posttests, as well as the follow-up tests, were blind for the individual participant's treatment condition. The respondents were instructed not to inform the interviewers or the trained researchers about the type of treatment or the number of sessions they had received". |
| Incomplete outcome data (attrition bias)                  | Low risk           | QUOTE: "To maximize use of information in this study with a small sample size, missing data were estimated with a restricted maximum likelihood procedure" ... "All participant were included in analyses".                                                                                                                                   |
| Selective reporting (reporting bias)                      | Low risk           | Protocol is not available, however all expected outcomes were clearly reported at post-test and at follow-up.                                                                                                                                                                                                                                 |
| Other bias                                                | Unclear risk       | QUOTE: "Self-report instruments were translated into the Arabic dialect spoken by the refugees in Imvepi (Juba-Arabic)". The authors of the paper are authors of the NET manual. Sponsorship bias cannot be ruled out. Research was funded by the Deutsche Forschungsgemeinschaft.                                                            |

## Neuner 2008

| Bias                                                      | Authors' judgement | Support for judgement                                                                                                                                                                                                                                              |
|-----------------------------------------------------------|--------------------|--------------------------------------------------------------------------------------------------------------------------------------------------------------------------------------------------------------------------------------------------------------------|
| Random sequence generation (selection bias)               | Low risk           | QUOTE: "The list of participants was ordered randomly; the first 4 were consecutively assigned to the NET, TC, NET, and TC groups; and the fifth was assigned to the MG (monitoring) group. This procedure was repeated until all 277 participants were assigned." |
| Allocation concealment (selection bias)                   | Unclear risk       | No information provided.                                                                                                                                                                                                                                           |
| Blinding of participants and personnel (performance bias) | Unclear risk       | Blinding patients and therapists in psychotherapy is not possible                                                                                                                                                                                                  |
| Blinding of outcome assessment (detection bias)           | Low risk           | Interviewers were blind with respect to the particular treatment condition.                                                                                                                                                                                        |
| Incomplete outcome data (attrition bias)                  | High risk          | More than 20% of patients abandoned the study prematurely. Study endpoint: 50/111 missing from NET group; 52/111 missing from TC group. QUOTE: "Aiming at an intention-to-treat analysis, we included in the outcome analysis all participants who were            |



|                                      |              |                                                                                                                                                                          |
|--------------------------------------|--------------|--------------------------------------------------------------------------------------------------------------------------------------------------------------------------|
|                                      |              | randomized.....we chose to apply mixed-effects models that allow the inclusion of all available data without the arbitrary replacement or imputation of missing values". |
| Selective reporting (reporting bias) | Low risk     | Protocol is not available. All expected outcomes were clearly reported.                                                                                                  |
| Other bias                           | Unclear risk | The authors of the paper are authors of the NET manual. Sponsorship bias cannot be ruled out.                                                                            |

## Neuner 2010

| Bias                                                      | Authors' judgement | Support for judgement                                                                                                                                                                                                                                                                                                                                                                                                              |
|-----------------------------------------------------------|--------------------|------------------------------------------------------------------------------------------------------------------------------------------------------------------------------------------------------------------------------------------------------------------------------------------------------------------------------------------------------------------------------------------------------------------------------------|
| Random sequence generation (selection bias)               | Low risk           | QUOTE: "participants were randomised into the two groups using a block permutation procedure with blocks of four patients".                                                                                                                                                                                                                                                                                                        |
| Allocation concealment (selection bias)                   | Unclear risk       | No information provided.                                                                                                                                                                                                                                                                                                                                                                                                           |
| Blinding of participants and personnel (performance bias) | Unclear risk       | Blinding patients and therapists in psychotherapy is not possible                                                                                                                                                                                                                                                                                                                                                                  |
| Blinding of outcome assessment (detection bias)           | Low risk           | QUOTE: "we aimed at keeping interviewers blind to each participant's condition. However, occasionally, the participants revealed their condition to the interviewer, despite instruction not to do so".                                                                                                                                                                                                                            |
| Incomplete outcome data (attrition bias)                  | Unclear risk       | QUOTE: "we chose to apply mixed effects models that allow the inclusion all available data....". However results are reported at post treatment only for completers. Only two patients dropped out from the NET group, one for reasons related to the treatment.                                                                                                                                                                   |
| Selective reporting (reporting bias)                      | Low risk           | Protocol is not available, however all expected outcomes were clearly reported at endpoint.                                                                                                                                                                                                                                                                                                                                        |
| Other bias                                                | Unclear risk       | Patients were heterogeneous in terms of country of origin. QUOTE: "All instruments were assessed in the form of structured interviews. NET treatment was carried out according to the manual by therapists from the University of Konstanz with the help of trained interpreters". Two of the authors of the paper are authors of the NET manual; Study was funded by European Refugee Fund. Sponsorship bias cannot be ruled out. |

## Otto 2003

| Bias                                                      | Authors' judgement | Support for judgement                                                                                                                                                                                                                                                             |
|-----------------------------------------------------------|--------------------|-----------------------------------------------------------------------------------------------------------------------------------------------------------------------------------------------------------------------------------------------------------------------------------|
| Random sequence generation (selection bias)               | Low risk           | QUOTE: "five patients were randomly assigned to sertraline treatment, and five to sertraline treatment plus ten sessions of CBT". No information provided about the sequence generation process. Difference in the average baseline value across treatment arms: ratio above 1.1. |
| Allocation concealment (selection bias)                   | Unclear risk       | No information provided.                                                                                                                                                                                                                                                          |
| Blinding of participants and personnel (performance bias) | Unclear risk       | Blinding patients and therapists in psychotherapy is not possible                                                                                                                                                                                                                 |
| Blinding of outcome assessment (detection bias)           | High risk          | No details are provided on how the outcomes were assessed                                                                                                                                                                                                                         |
| Incomplete outcome data (attrition bias)                  | Unclear risk       | Drop-out data are not reported.                                                                                                                                                                                                                                                   |
| Selective reporting (reporting bias)                      | Low risk           | Protocol is not available. All expected outcomes were reported, even if the total score of primary outcome is not reported.                                                                                                                                                       |
| Other bias                                                | Low risk           | All participants were Cambodian (Khmer-speaking); treatment services were provided in Khmer; most of the scales have been validated for Khmer population. Sponsorship bias is unlikely to have occurred.                                                                          |

## Paunovic 2001

| Bias                                                      | Authors' judgement | Support for judgement                                                                                                                                                                                                |
|-----------------------------------------------------------|--------------------|----------------------------------------------------------------------------------------------------------------------------------------------------------------------------------------------------------------------|
| Random sequence generation (selection bias)               | Low risk           | QUOTE: "The patients were randomly assigned to two treatments, CBT or E, with the provision that no more than two consecutive patients could be randomized to the same condition."                                   |
| Allocation concealment (selection bias)                   | Unclear risk       | No information provided.                                                                                                                                                                                             |
| Blinding of participants and personnel (performance bias) | Unclear risk       | Blinding patients and therapists in psychotherapy is not possible                                                                                                                                                    |
| Blinding of outcome assessment (detection bias)           | High risk          | QUOTE: "an independent assessor was not used; the first author was both the assessor and the therapist". Some self-report instruments were used without interpreters according to inclusion criterion.               |
| Incomplete outcome data (attrition bias)                  | High risk          | High attrition rate in the treatment group with 3 participants (30%) excluded. This compared with 1 (10%) in the comparison group. No indication that excluded participants' outcomes were included in the analyses. |
| Selective reporting (reporting bias)                      | Low risk           | Protocol is not available. All expected outcomes were reported.                                                                                                                                                      |
| Other bias                                                | Unclear risk       | Treatment was conducted by the first author. Sponsorship bias cannot be ruled out.                                                                                                                                   |

## Shaw 2018

| Bias                                                      | Authors' judgement | Support for judgement                                                                                                                                                                                                                                                        |
|-----------------------------------------------------------|--------------------|------------------------------------------------------------------------------------------------------------------------------------------------------------------------------------------------------------------------------------------------------------------------------|
| Random sequence generation (selection bias)               | Low risk           | QUOTE: "random assignment was done through online software. Participants were randomized either to an initial treatment group [...] or to a waiting list control group"                                                                                                      |
| Allocation concealment (selection bias)                   | Unclear risk       | No information provided.                                                                                                                                                                                                                                                     |
| Blinding of participants and personnel (performance bias) | Unclear risk       | Blinding patients and therapists in psychotherapy is not possible                                                                                                                                                                                                            |
| Blinding of outcome assessment (detection bias)           | High risk          | QUOTE: "the research assistant was not blind to group assignment"                                                                                                                                                                                                            |
| Incomplete outcome data (attrition bias)                  | Low risk           | QUOTE: "An intention-to-treat approach was utilized". Missing data were very few [...] with no missing data in the waitlist control group for all measurements, and no more than three participants missing in the treatment group at post treatment and 3 month follow-up". |
| Selective reporting (reporting bias)                      | Low risk           | Protocol is not available. All expected outcomes were reported.                                                                                                                                                                                                              |
| Other bias                                                | Unclear risk       | All Afghan participants. Intervention groups were facilitated jointly by the first author. Some support received from Carefugees in Malaysia.                                                                                                                                |

## Stenmark 2013

| Bias                                        | Authors' judgement | Support for judgement                                                                                                                                                      |
|---------------------------------------------|--------------------|----------------------------------------------------------------------------------------------------------------------------------------------------------------------------|
| Random sequence generation (selection bias) | Low risk           | QUOTE: "Participants were randomized to the treatment conditions by drawing ball from a bag with an a-priori 2/3 chance of receiving NET and 1/3 chance of receiving TAU". |

|                                                           |              |                                                                                                                                                                                                                                                                                                                            |
|-----------------------------------------------------------|--------------|----------------------------------------------------------------------------------------------------------------------------------------------------------------------------------------------------------------------------------------------------------------------------------------------------------------------------|
| Allocation concealment (selection bias)                   | Unclear risk | No information provided.                                                                                                                                                                                                                                                                                                   |
| Blinding of participants and personnel (performance bias) | Unclear risk | Blinding patients and therapists in psychotherapy is not possible                                                                                                                                                                                                                                                          |
| Blinding of outcome assessment (detection bias)           | Low risk     | Single blind: outcomes assessor. QUOTE: "assessor had no access to information about what therapy the patients' had been assigned to and the therapists were instructed not to reveal the type of treatment their patients were given. The aim was to make the assessor as blind as possible to the patients' treatments." |
| Incomplete outcome data (attrition bias)                  | High risk    | Drop-out were high in both arms (36% and 30% respectively) with similar reasons across groups. Authors state that intention-to-treat analyses were conducted and that results did not differ from treatment completers. However only completers results are reported.                                                      |
| Selective reporting (reporting bias)                      | High risk    | Protocol is available and all prespecified outcomes were reported however data in the paper are reported only in graphs.                                                                                                                                                                                                   |
| Other bias                                                | Unclear risk | There were differences in the background training of the therapists. Patients were heterogeneous in terms of country of origin. QUOTE: "assessment tools were not validated to the language and culture of each participant". Two of the authors of the paper are authors of the NET manual.                               |

## ter Heide 2011

| Bias                                                      | Authors' judgement | Support for judgement                                                                                                                                                                                                                                                                                                                                                 |
|-----------------------------------------------------------|--------------------|-----------------------------------------------------------------------------------------------------------------------------------------------------------------------------------------------------------------------------------------------------------------------------------------------------------------------------------------------------------------------|
| Random sequence generation (selection bias)               | Low risk           | QUOTE: "Participants were assigned to their experimental group using simple randomisation through flipping a coin". Difference in the average baseline value across treatment arms: ratio above 1.1.                                                                                                                                                                  |
| Allocation concealment (selection bias)                   | Low risk           | QUOTE: "An independent research associate performed randomisation".                                                                                                                                                                                                                                                                                                   |
| Blinding of participants and personnel (performance bias) | Unclear risk       | Blinding patients and therapists in psychotherapy is not possible                                                                                                                                                                                                                                                                                                     |
| Blinding of outcome assessment (detection bias)           | Low risk           | QUOTE: "The interview was administered in Dutch by trained, blind assessors. Blindness was maintained in 33 out of 44 assessments (70%)".                                                                                                                                                                                                                             |
| Incomplete outcome data (attrition bias)                  | High risk          | Drop-out were high in both arms (50%) with similar reasons across groups. Authors stated that no significant differences were found between completers and drop-outs. Primary and secondary outcomes were provided for completers only.                                                                                                                               |
| Selective reporting (reporting bias)                      | Low risk           | Protocol is not available, however all outcome were reported in the paper.                                                                                                                                                                                                                                                                                            |
| Other bias                                                | Low risk           | Patients were heterogeneous in terms of country of origin. QUOTE: "Self-report questionnaires were administered in the patient's native language if possible; interpreters were used when necessary [...] This study was partially funded by ZonMW, the Netherlands organisation for health research and development". Sponsorship bias is unlikely to have occurred. |

## ter Heide 2016

| Bias                                                      | Authors' judgement | Support for judgement                                                                                                                                                                                                                                            |
|-----------------------------------------------------------|--------------------|------------------------------------------------------------------------------------------------------------------------------------------------------------------------------------------------------------------------------------------------------------------|
| Random sequence generation (selection bias)               | Low risk           | QUOTE: "A two-arm design was used in which participants were randomly assigned to either 12 h (9 session) of EMDR therapy or 12h (12 sessions) of stabilisation as usual. [...] Participants were assigned to their experimental group through flipping a coin". |
| Allocation concealment (selection bias)                   | Low risk           | QUOTE: "An independent research associated who was not otherwise involved in the inclusion process performed randomization".                                                                                                                                     |
| Blinding of participants and personnel (performance bias) | Unclear risk       | Blinding patients and therapists in psychotherapy is not possible                                                                                                                                                                                                |

|                                                 |           |                                                                                                                                                                                                                                                                                                                                                                |
|-------------------------------------------------|-----------|----------------------------------------------------------------------------------------------------------------------------------------------------------------------------------------------------------------------------------------------------------------------------------------------------------------------------------------------------------------|
| Blinding of outcome assessment (detection bias) | Low risk  | QUOTE: "Interviews were administered by trained Master's students in psychology who were kept masked to treatment condition by having limited access to participant data and by asking participants not to reveal treatment content".                                                                                                                          |
| Incomplete outcome data (attrition bias)        | High risk | Drop-out rates were high in both arms (32.4% in EMDR group [12/37] and 37.8% in stabilisation group [14/37]) with similar reasons across groups.<br><br>Authors stated that an intent-to-treat analyses for primary outcomes was performed (tab 3): quote "Bayesian analysis enables full intent-to-treat analysis as missing data are automatically imputed". |
| Selective reporting (reporting bias)            | Low risk  | Protocol is not available, however all outcome were reported in the paper.                                                                                                                                                                                                                                                                                     |
| Other bias                                      | Low risk  | QUOTE: "Interpreters were used whenever the participant did not speak Dutch and the instrument was not available in the participant's native language. This study was jointly funded by ZonMW, The Netherlands organisation for health research and development, and Foundation Centrum '45 [...]". Sponsorship bias is unlikely to have occurred.             |

## Tol 2020

| Bias                                                      | Authors' judgement | Support for judgement                                                                                                                                                                                                                                                                                                                                                                                                                                              |
|-----------------------------------------------------------|--------------------|--------------------------------------------------------------------------------------------------------------------------------------------------------------------------------------------------------------------------------------------------------------------------------------------------------------------------------------------------------------------------------------------------------------------------------------------------------------------|
| Random sequence generation (selection bias)               | Low risk           | QUOTE: "Randomisation was done by an independent epidemiologist at Johns Hopkins University (Baltimore, MD, USA). A simple random allocation sequence was generated using Stata 14 and villages were allocated to intervention with enhanced usual care or enhanced usual care alone. [...] households were randomly selected by spinning a bottle [...] If there were multiple eligible women we randomly selected one by drawing slips".                         |
| Allocation concealment (selection bias)                   | Low risk           | See above                                                                                                                                                                                                                                                                                                                                                                                                                                                          |
| Blinding of participants and personnel (performance bias) | Unclear risk       | Blinding patients and therapists in psychotherapy is not possible                                                                                                                                                                                                                                                                                                                                                                                                  |
| Blinding of outcome assessment (detection bias)           | Low risk           | QUOTE: "The allocation sequence was hidden from assessors. [...] To maintain masking, assessors worked in a separate office and visited the settlement on different days from Self-Help Plus facilitators, who were instructed not to disclose allocation".                                                                                                                                                                                                        |
| Incomplete outcome data (attrition bias)                  | Low risk           | Low attrition rates. QUOTE: "Most of these participants were lost to follow-up because they moved location. Participants lost to follow-up were similar in number across study groups, and attrition was not significantly related to study condition, marital status, work status, or education.[...] For participants lost at follow-up, we used listwise deletion (or complete case analysis), an acceptable approach when the level of missing data is minimal |
| Selective reporting (reporting bias)                      | Low risk           | QUOTE: "The trial protocol was published previously, and no changes were made to design after the trial started". All outcome were reported in the paper                                                                                                                                                                                                                                                                                                           |
| Other bias                                                | Low risk           | Participatns were all south Sudanese female refugees. Measures were translated in Juba Arabic and reviewed by an independent South Sudanese mental health expert to assess translations for clinical validity. Project funded by the Research for Health in Humanitarian Crises (R2HC) Programme, managed by ELRHA. Sponsorship bias is unlikely to have occurred.                                                                                                 |

## Weine 2008

| Bias                                                      | Authors' judgement | Support for judgement                                                                                                                 |
|-----------------------------------------------------------|--------------------|---------------------------------------------------------------------------------------------------------------------------------------|
| Random sequence generation (selection bias)               | Low risk           | QUOTE: "subjects were randomly assigned to one of the two conditions". No information provided about the sequence generation process. |
| Allocation concealment (selection bias)                   | Unclear risk       | No information provided.                                                                                                              |
| Blinding of participants and personnel (performance bias) | Unclear risk       | Blinding patients and therapists in psychotherapy is not possible                                                                     |

|                                                 |              |                                                                                                                                                                                                                                                                                                                                                          |
|-------------------------------------------------|--------------|----------------------------------------------------------------------------------------------------------------------------------------------------------------------------------------------------------------------------------------------------------------------------------------------------------------------------------------------------------|
| Blinding of outcome assessment (detection bias) | High risk    | No details are provided on how the outcomes were assessed.                                                                                                                                                                                                                                                                                               |
| Incomplete outcome data (attrition bias)        | Unclear risk | QUOTE: "The attrition rates for assessments of the control and intervention groups, respectively, were as follows: 14% and 17% (6 months); 10% and 6% (12 months); 1% and 4% (18 months)". Authors did not reported sufficient information (number randomized not stated, no reasons for missing data provided).                                         |
| Selective reporting (reporting bias)            | High risk    | Protocol is not available. Most of the outcomes were not reported as raw data but only as random effects model.                                                                                                                                                                                                                                          |
| Other bias                                      | Low risk     | All participants were Bosnian. QUOTE: "all instruments were translated into Bosnian by the research team. Back translations were used to improve the word selection and to verify that questions were understandable to the refugees." The work was supported by the National Institute of Mental Health. Sponsorship bias is unlikely to have occurred. |

## Yurtsever 2018

| Bias                                                      | Authors' judgement | Support for judgement                                                                                                                                                                                                            |
|-----------------------------------------------------------|--------------------|----------------------------------------------------------------------------------------------------------------------------------------------------------------------------------------------------------------------------------|
| Random sequence generation (selection bias)               | Low risk           | QUOTE: "Participants who had an IES-R score of equal or above 33 were randomly assigned by a computer program to the experimental group (EMDR GTEP= 31) and the EMDR control group (control group =32)".                         |
| Allocation concealment (selection bias)                   | Unclear risk       | No information provided.                                                                                                                                                                                                         |
| Blinding of participants and personnel (performance bias) | Unclear risk       | Blinding patients and therapists in psychotherapy is not possible                                                                                                                                                                |
| Blinding of outcome assessment (detection bias)           | Low risk           | QUOTE: "None of the therapists who ran the groups took a role in conducting the surveys of the participants or saw the results".                                                                                                 |
| Incomplete outcome data (attrition bias)                  | High risk          | QUOTE: "Ten people from the experimental group were unable to attend two sessions of G-TAP and so were also excluded from the study (n = 21)." Analysis carried out only on completers.                                          |
| Selective reporting (reporting bias)                      | Low risk           | Protocol is not available, however all outcome were reported in the paper.                                                                                                                                                       |
| Other bias                                                | Low risk           | QUOTE: "the ethical approval was given by the EMDR Turkey Research Committee". Syrian arabic version of instruments has been used. The testers spoke Arabic and Turkish fluently. Sponsorship bias is unlikely to have occurred. |

## PRISMA NMA checklist

| Section/Topic                          | Item #    | Checklist Item                                                                                                                                                                                                                                                                                                                                                                                                                                                                                                                                                                                                                                                                                                                                                                          | Reported on Page # |
|----------------------------------------|-----------|-----------------------------------------------------------------------------------------------------------------------------------------------------------------------------------------------------------------------------------------------------------------------------------------------------------------------------------------------------------------------------------------------------------------------------------------------------------------------------------------------------------------------------------------------------------------------------------------------------------------------------------------------------------------------------------------------------------------------------------------------------------------------------------------|--------------------|
| <b>TITLE</b>                           |           |                                                                                                                                                                                                                                                                                                                                                                                                                                                                                                                                                                                                                                                                                                                                                                                         |                    |
| Title                                  | 1         | Identify the report as a systematic review <i>incorporating a network meta-analysis (or related form of meta-analysis)</i> .                                                                                                                                                                                                                                                                                                                                                                                                                                                                                                                                                                                                                                                            | 1                  |
| <b>ABSTRACT</b>                        |           |                                                                                                                                                                                                                                                                                                                                                                                                                                                                                                                                                                                                                                                                                                                                                                                         |                    |
| Structured summary                     | 2         | Provide a structured summary including, as applicable:<br><b>Background:</b> main objectives<br><b>Methods:</b> data sources; study eligibility criteria, participants, and interventions; study appraisal; and <i>synthesis methods, such as network meta-analysis</i> .<br><b>Results:</b> number of studies and participants identified; summary estimates with corresponding confidence/credible intervals; <i>treatment rankings may also be discussed. Authors may choose to summarize pairwise comparisons against a chosen treatment included in their analyses for brevity.</i><br><b>Discussion/Conclusions:</b> limitations; conclusions and implications of findings.<br><b>Other:</b> primary source of funding; systematic review registration number with registry name. | 3                  |
| <b>INTRODUCTION</b>                    |           |                                                                                                                                                                                                                                                                                                                                                                                                                                                                                                                                                                                                                                                                                                                                                                                         |                    |
| Rationale                              | 3         | Describe the rationale for the review in the context of what is already known, <i>including mention of why a network meta-analysis has been conducted</i> .                                                                                                                                                                                                                                                                                                                                                                                                                                                                                                                                                                                                                             | 6                  |
| Objectives                             | 4         | Provide an explicit statement of questions being addressed, with reference to participants, interventions, comparisons, outcomes, and study design (PICOS).                                                                                                                                                                                                                                                                                                                                                                                                                                                                                                                                                                                                                             | 6                  |
| <b>METHODS</b>                         |           |                                                                                                                                                                                                                                                                                                                                                                                                                                                                                                                                                                                                                                                                                                                                                                                         |                    |
| Protocol and registration              | 5         | Indicate whether a review protocol exists and if and where it can be accessed (e.g., Web address); and, if available, provide registration information, including registration number.                                                                                                                                                                                                                                                                                                                                                                                                                                                                                                                                                                                                  | 6                  |
| Eligibility criteria                   | 6         | Specify study characteristics (e.g., PICOS, length of follow-up) and report characteristics (e.g., years considered, language, publication status) used as criteria for eligibility, giving rationale. <i>Clearly describe eligible treatments included in the treatment network, and note whether any have been clustered or merged into the same node (with justification)</i> .                                                                                                                                                                                                                                                                                                                                                                                                      | 7                  |
| Information sources                    | 7         | Describe all information sources (e.g., databases with dates of coverage, contact with study authors to identify additional studies) in the search and date last searched.                                                                                                                                                                                                                                                                                                                                                                                                                                                                                                                                                                                                              | 7                  |
| Search                                 | 8         | Present full electronic search strategy for at least one database, including any limits used, such that it could be repeated.                                                                                                                                                                                                                                                                                                                                                                                                                                                                                                                                                                                                                                                           | Not reported       |
| Study selection                        | 9         | State the process for selecting studies (i.e., screening, eligibility, included in systematic review, and, if applicable, included in the meta-analysis).                                                                                                                                                                                                                                                                                                                                                                                                                                                                                                                                                                                                                               | 7                  |
| Data collection process                | 10        | Describe method of data extraction from reports (e.g., piloted forms, independently, in duplicate) and any processes for obtaining and confirming data from investigators.                                                                                                                                                                                                                                                                                                                                                                                                                                                                                                                                                                                                              | 8                  |
| Data items                             | 11        | List and define all variables for which data were sought (e.g., PICOS, funding sources) and any assumptions and simplifications made.                                                                                                                                                                                                                                                                                                                                                                                                                                                                                                                                                                                                                                                   | 8                  |
| <b>Geometry of the network</b>         | <b>S1</b> | Describe methods used to explore the geometry of the treatment network under study and potential biases related to it. This should include how the evidence base has been graphically summarized for presentation, and what characteristics were compiled and used to describe the evidence base to readers.                                                                                                                                                                                                                                                                                                                                                                                                                                                                            | 9,10,11            |
| Risk of bias within individual studies | 12        | Describe methods used for assessing risk of bias of individual studies (including specification of whether this was done at the study or outcome level), and how this information is to be used in any data synthesis.                                                                                                                                                                                                                                                                                                                                                                                                                                                                                                                                                                  | 8                  |
| Summary measures                       | 13        | State the principal summary measures (e.g., risk ratio, difference in means). <i>Also describe the use of additional summary measures assessed, such as treatment rankings and surface under the cumulative ranking curve (SUCRA) values, as well as modified approaches used to present summary findings from meta-analyses.</i>                                                                                                                                                                                                                                                                                                                                                                                                                                                       | 9,10               |
| Planned methods of analysis            | 14        | Describe the methods of handling data and combining results of studies for each network meta-analysis. This should include, but not be limited to:<br><ul style="list-style-type: none"> <li>• <i>Handling of multi-arm trials;</i></li> <li>• <i>Selection of variance structure;</i></li> <li>• <i>Selection of prior distributions in Bayesian analyses; and</i></li> </ul>                                                                                                                                                                                                                                                                                                                                                                                                          | 9,10               |

|                                          |           |                                                                                                                                                                                                                                                                                                                                                                                                                                                              |          |
|------------------------------------------|-----------|--------------------------------------------------------------------------------------------------------------------------------------------------------------------------------------------------------------------------------------------------------------------------------------------------------------------------------------------------------------------------------------------------------------------------------------------------------------|----------|
|                                          |           | <ul style="list-style-type: none"> <li>Assessment of model fit.</li> </ul>                                                                                                                                                                                                                                                                                                                                                                                   |          |
| <b>Assessment of Inconsistency</b>       | <b>S2</b> | Describe the statistical methods used to evaluate the agreement of direct and indirect evidence in the treatment network(s) studied. Describe efforts taken to address its presence when found.                                                                                                                                                                                                                                                              | 10       |
| Risk of bias across studies              | 15        | Specify any assessment of risk of bias that may affect the cumulative evidence (e.g., publication bias, selective reporting within studies).                                                                                                                                                                                                                                                                                                                 | 10       |
| Additional analyses                      | 16        | Describe methods of additional analyses if done, indicating which were pre-specified. This may include, but not be limited to, the following: <ul style="list-style-type: none"> <li>Sensitivity or subgroup analyses;</li> <li>Meta-regression analyses;</li> <li>Alternative formulations of the treatment network; and</li> <li>Use of alternative prior distributions for Bayesian analyses (if applicable).</li> </ul>                                  | 11       |
| <b>RESULTS†</b>                          |           |                                                                                                                                                                                                                                                                                                                                                                                                                                                              |          |
| Study selection                          | 17        | Give numbers of studies screened, assessed for eligibility, and included in the review, with reasons for exclusions at each stage, ideally with a flow diagram.                                                                                                                                                                                                                                                                                              | 11       |
| <b>Presentation of network structure</b> | <b>S3</b> | Provide a network graph of the included studies to enable visualization of the geometry of the treatment network.                                                                                                                                                                                                                                                                                                                                            | Figure 2 |
| <b>Summary of network geometry</b>       | <b>S4</b> | Provide a brief overview of characteristics of the treatment network. This may include commentary on the abundance of trials and randomized patients for the different interventions and pairwise comparisons in the network, gaps of evidence in the treatment network, and potential biases reflected by the network structure.                                                                                                                            |          |
| Study characteristics                    | 18        | For each study, present characteristics for which data were extracted (e.g., study size, PICOS, follow-up period) and provide the citations.                                                                                                                                                                                                                                                                                                                 | 11       |
| Risk of bias within studies              | 19        | Present data on risk of bias of each study and, if available, any outcome level assessment.                                                                                                                                                                                                                                                                                                                                                                  | 12       |
| Results of individual studies            | 20        | For all outcomes considered (benefits or harms), present, for each study: 1) simple summary data for each intervention group, and 2) effect estimates and confidence intervals. <i>Modified approaches may be needed to deal with information from larger networks.</i>                                                                                                                                                                                      | 12-17    |
| Synthesis of results                     | 21        | Present results of each meta-analysis done, including confidence/credible intervals. <i>In larger networks, authors may focus on comparisons versus a particular comparator (e.g. placebo or standard care), with full findings presented in an appendix. League tables and forest plots may be considered to summarize pairwise comparisons.</i> If additional summary measures were explored (such as treatment rankings), these should also be presented. | 12-17    |
| <b>Exploration for inconsistency</b>     | <b>S5</b> | Describe results from investigations of inconsistency. This may include such information as measures of model fit to compare consistency and inconsistency models, <i>P</i> values from statistical tests, or summary of inconsistency estimates from different parts of the treatment network.                                                                                                                                                              | 12-17    |
| Risk of bias across studies              | 22        | Present results of any assessment of risk of bias across studies for the evidence base being studied.                                                                                                                                                                                                                                                                                                                                                        | 16       |
| Results of additional analyses           | 23        | Give results of additional analyses, if done (e.g., sensitivity or subgroup analyses, meta-regression analyses, <i>alternative network geometries studied, alternative choice of prior distributions for Bayesian analyses</i> , and so forth).                                                                                                                                                                                                              | 15-16    |
| <b>DISCUSSION</b>                        |           |                                                                                                                                                                                                                                                                                                                                                                                                                                                              |          |
| Summary of evidence                      | 24        | Summarize the main findings, including the strength of evidence for each main outcome; consider their relevance to key groups (e.g., healthcare providers, users, and policy-makers).                                                                                                                                                                                                                                                                        | 17,18    |
| Limitations                              | 25        | Discuss limitations at study and outcome level (e.g., risk of bias), and at review level (e.g., incomplete retrieval of identified research, reporting bias). <i>Comment on the validity of the assumptions, such as transitivity and consistency. Comment on any concerns regarding network geometry (e.g., avoidance of certain comparisons).</i>                                                                                                          | 18,19    |
| Conclusions                              | 26        | Provide a general interpretation of the results in the context of other evidence, and implications for future research.                                                                                                                                                                                                                                                                                                                                      | 19,20,21 |
| <b>FUNDING</b>                           |           |                                                                                                                                                                                                                                                                                                                                                                                                                                                              |          |
| Funding                                  | 27        | Describe sources of funding for the systematic review and other support (e.g., supply of data); role of funders for the systematic review. This should also include information regarding whether funding has been received from manufacturers of treatments in the network and/or whether some of the authors are content experts with professional conflicts of interest that could affect use of treatments in the network.                               | 22       |

PICOS = population, intervention, comparators, outcomes, study design.

\* Text in italics indicates wording specific to reporting of network meta-analyses that has been added to guidance from the PRISMA statement.

† Authors may wish to plan for use of appendices to present all relevant information in full detail for items in this section.

**Abbreviations:**

WL = waitlist

TAU = treatment as usual

SH+ = self-help plus

NET = narrative exposure therapy

EMDR = eye movement desensitization and reprocessing

SSM = stabilization/stress management (SM: stress management; ST: stabilization therapy; SIT: stress inoculation training)

SC = supportive/trauma counselling

CBT = cognitive behavioural therapy



## Primary outcome: PTSD symptoms

### Intervention codes:

|                                 |   |
|---------------------------------|---|
| Waiting List                    | 1 |
| Treatment as Usual              | 2 |
| Self-Help Plus                  | 3 |
| Narrative Exposure Therapy      | 4 |
| EMDR                            | 5 |
| Stabilization/Stress Management | 6 |
| Supportive Counseling           | 7 |
| Cognitive- Behavioural Therapy  | 8 |

### Studies contributing to the analysis n= 18

#### Network map

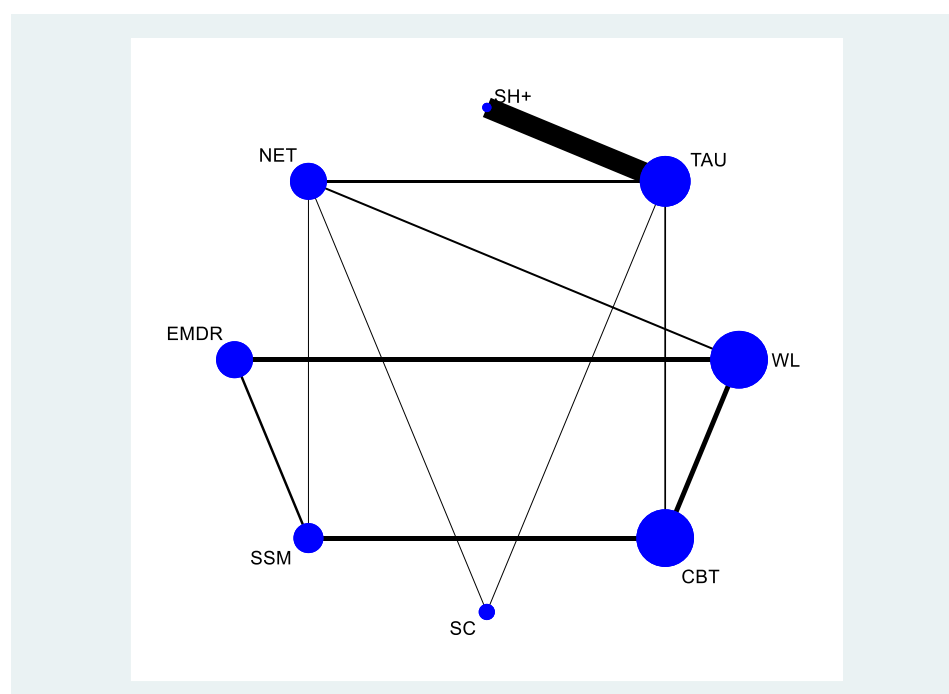

#### Net league table

|                            |                            |                    |                    |                    |                    |                   |                    |
|----------------------------|----------------------------|--------------------|--------------------|--------------------|--------------------|-------------------|--------------------|
| <b>CBT</b>                 | 0.10 (-1.26,1.47)          | 0.93 (-0.44,2.29)  | 1.19 (-0.99,3.36)  | 0.95 (-1.39,3.29)  | 0.50 (-0.86,1.87)  | 1.51 (0.36,2.67)  | 1.41 (0.38,2.43)   |
| -0.10 (-1.47,1.26)         | <b>EMDR</b>                | 0.82 (-0.77,2.41)  | 1.08 (-1.31,3.48)  | 0.85 (-1.77,3.46)  | 0.40 (-0.89,1.68)  | 1.41 (-0.23,3.05) | 1.30 (0.20,2.40)   |
| -0.93 (-2.29,0.44)         | -0.82 (-2.41,0.77)         | <b>NET</b>         | 0.26 (-1.72,2.24)  | 0.02 (-2.37,2.42)  | -0.43 (-1.92,1.07) | 0.58 (-0.67,1.84) | 0.48 (-0.90,1.85)  |
| -1.19 (-3.36,0.99)         | -1.08 (-3.48,1.31)         | -0.26 (-2.24,1.72) | <b>SC</b>          | -0.24 (-3.08,2.61) | -0.68 (-3.04,1.67) | 0.33 (-1.66,2.31) | 0.22 (-2.03,2.47)  |
| -0.95 (-3.29,1.39)         | -0.85 (-3.46,1.77)         | -0.02 (-2.42,2.37) | 0.24 (-2.61,3.08)  | <b>SHplus</b>      | -0.45 (-3.04,2.14) | 0.56 (-1.47,2.60) | 0.46 (-2.01,2.93)  |
| -0.50 (-1.87,0.86)         | -0.40 (-1.68,0.89)         | 0.43 (-1.07,1.92)  | 0.68 (-1.67,3.04)  | 0.45 (-2.14,3.04)  | <b>SSM</b>         | 1.01 (-0.59,2.61) | 0.91 (-0.45,2.26)  |
| <b>-1.51 (-2.67,-0.36)</b> | -1.41 (-3.05,0.23)         | -0.58 (-1.84,0.67) | -0.33 (-2.31,1.66) | -0.56 (-2.60,1.47) | -1.01 (-2.61,0.59) | <b>TAU</b>        | -0.11 (-1.50,1.29) |
| <b>-1.41 (-2.43,-0.38)</b> | <b>-1.30 (-2.40,-0.20)</b> | -0.48 (-1.85,0.90) | -0.22 (-2.47,2.03) | -0.46 (-2.93,2.01) | -0.91 (-2.26,0.45) | 0.11 (-1.29,1.50) | <b>WL</b>          |

#### Interval Plot

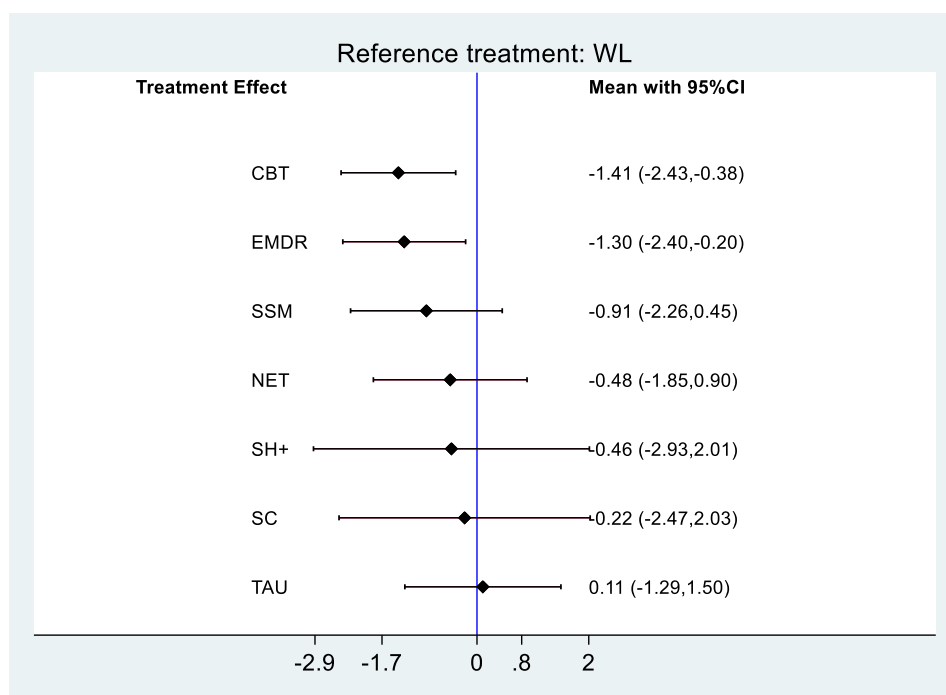

### Pairwise meta-analysis

| Study         | ES     | [95% Conf. Interval] |        |
|---------------|--------|----------------------|--------|
| -----         |        |                      |        |
| 5 - 1         |        |                      |        |
| 0             | -1.651 | -2.510               | -0.792 |
| 1             | -1.810 | -2.283               | -1.337 |
| 18            | -0.616 | -1.219               | -0.014 |
| Sub-total     |        |                      |        |
| D+L pooled ES | -1.355 | -2.154               | -0.556 |
| -----         |        |                      |        |
| 8 - 1         |        |                      |        |
| 3             | 0.162  | -0.231               | 0.555  |
| 6             | -2.213 | -3.768               | -0.658 |
| 19            | -0.111 | -0.871               | 0.649  |
| 21            | -4.915 | -6.482               | -3.348 |
| Sub-total     |        |                      |        |
| D+L pooled ES | -1.608 | -3.314               | 0.098  |
| -----         |        |                      |        |
| 8 - 6         |        |                      |        |
| 4             | -0.067 | -0.416               | 0.283  |
| Sub-total     |        |                      |        |
| D+L pooled ES | -0.067 | -0.416               | 0.283  |
| -----         |        |                      |        |
| 6 - 4         |        |                      |        |
| 5             | 0.244  | -0.616               | 1.105  |
| Sub-total     |        |                      |        |
| D+L pooled ES | 0.244  | -0.616               | 1.105  |
| -----         |        |                      |        |
| 8 - 2         |        |                      |        |
| 7             | -2.121 | -2.915               | -1.328 |
| 8             | -1.904 | -2.905               | -0.903 |
| 12            | -0.825 | -2.161               | 0.511  |
| Sub-total     |        |                      |        |
| D+L pooled ES | -1.775 | -2.450               | -1.100 |
| -----         |        |                      |        |
| 4 - 2         |        |                      |        |
| 9             | -0.190 | -0.951               | 0.570  |
| 14            | -0.566 | -1.124               | -0.007 |
| Sub-total     |        |                      |        |
| D+L pooled ES | -0.434 | -0.884               | 0.016  |

|       |               |  |        |        |        |
|-------|---------------|--|--------|--------|--------|
| 7 - 2 |               |  |        |        |        |
| 9     |               |  | -0.127 | -0.912 | 0.658  |
|       | Sub-total     |  |        |        |        |
|       | D+L pooled ES |  | -0.127 | -0.912 | 0.658  |
| ----- |               |  |        |        |        |
| 7 - 4 |               |  |        |        |        |
| 9     |               |  | 0.063  | -0.679 | 0.806  |
|       | Sub-total     |  |        |        |        |
|       | D+L pooled ES |  | 0.063  | -0.679 | 0.806  |
| ----- |               |  |        |        |        |
| 6 - 5 |               |  |        |        |        |
| 15    |               |  | 0.641  | -0.657 | 1.940  |
| 16    |               |  | 0.058  | -0.444 | 0.561  |
|       | Sub-total     |  |        |        |        |
|       | D+L pooled ES |  | 0.134  | -0.334 | 0.603  |
| ----- |               |  |        |        |        |
| 4 - 1 |               |  |        |        |        |
| 20    |               |  | -0.262 | -0.782 | 0.259  |
|       | Sub-total     |  |        |        |        |
|       | D+L pooled ES |  | -0.262 | -0.782 | 0.259  |
| ----- |               |  |        |        |        |
| 3 - 2 |               |  |        |        |        |
| 22    |               |  | -0.563 | -0.725 | -0.401 |
|       | Sub-total     |  |        |        |        |
|       | D+L pooled ES |  | -0.563 | -0.725 | -0.401 |
| ----- |               |  |        |        |        |

**Test(s) of heterogeneity:**

|       | Heterogeneity statistic | degrees of freedom | P     | I-squared** | Tau-squared |
|-------|-------------------------|--------------------|-------|-------------|-------------|
| 5 - 1 | 9.72                    | 2                  | 0.008 | 79.4%       | 0.3900      |
| 8 - 1 | 44.50                   | 3                  | 0.000 | 93.3%       | 2.6905      |
| 8 - 6 | 0.00                    | 0                  | .     | .%          | 0.0000      |
| 6 - 4 | 0.00                    | 0                  | .     | .%          | 0.0000      |
| 8 - 2 | 2.71                    | 2                  | 0.257 | 26.3%       | 0.0963      |
| 4 - 2 | 0.61                    | 1                  | 0.436 | 0.0%        | 0.0000      |
| 7 - 2 | 0.00                    | 0                  | .     | .%          | 0.0000      |
| 7 - 4 | 0.00                    | 0                  | .     | .%          | 0.0000      |
| 6 - 5 | 0.67                    | 1                  | 0.412 | 0.0%        | 0.0000      |
| 4 - 1 | 0.00                    | 0                  | .     | .%          | 0.0000      |
| 3 - 2 | 0.00                    | 0                  | .     | .%          | 0.0000      |

\*\* I-squared: the variation in ES attributable to heterogeneity

**Evaluation of heterogeneity and incoherence**

Overall heterogeneity in the inconsistency model  
Estimated between-studies SD: 1.336

Overall heterogeneity in the consistency model  
Estimated between-studies SD: 1.036

Overall incoherence  
Design-by-treatment test: P=0.974

Loop-specific heterogeneity

\* 1 triangular loops found  
\* 5 quadratic loops found

Note: Heterogeneity of loop TAU-NET-SC cannot be estimated due to insufficient observations - set equal to 0

Evaluation of inconsistency using loop-specific heterogeneity estimates:

|         |      |  |    |  |      |  |         |  |         |  |       |  |                   |  |
|---------|------|--|----|--|------|--|---------|--|---------|--|-------|--|-------------------|--|
| +-----+ |      |  |    |  |      |  |         |  |         |  |       |  |                   |  |
|         | Loop |  | IF |  | seIF |  | z_value |  | p_value |  | CI_95 |  | Loop_Heterog_tau2 |  |
| +-----+ |      |  |    |  |      |  |         |  |         |  |       |  |                   |  |

|                 |       |       |       |       |             |       |  |
|-----------------|-------|-------|-------|-------|-------------|-------|--|
| TAU-NET-SSM-CBT | 1.561 | 0.655 | 2.382 | 0.017 | (0.28,2.85) | 0.020 |  |
| WL-NET-SSM-CBT  | 1.524 | 4.026 | 0.379 | 0.705 | (0.00,9.42) | 2.690 |  |
| WL-NET-EMDR-SSM | 1.084 | 1.130 | 0.960 | 0.337 | (0.00,3.30) | 0.311 |  |
| TAU-NET-SC      | 0.375 | 0.621 | 0.605 | 0.545 | (0.00,1.59) | 0.000 |  |
| WL-EMDR-SSM-CBT | 0.353 | 2.261 | 0.156 | 0.876 | (0.00,4.78) | 1.248 |  |
| WL-TAU-NET-CBT  | 0.060 | 2.277 | 0.026 | 0.979 | (0.00,4.52) | 1.329 |  |

#### Consistency between direct and indirect estimates

| Side  | Direct    |           | Indirect  |           | Difference |           | P> z  | tau      |
|-------|-----------|-----------|-----------|-----------|------------|-----------|-------|----------|
|       | Coef.     | Std. Err. | Coef.     | Std. Err. | Coef.      | Std. Err. |       |          |
| 1 4   | -.2615775 | 1.139177  | -.6653683 | .9826878  | .4037908   | 1.50446   | 0.788 | 1.107837 |
| 1 5   | -1.356682 | .6648954  | -1.115961 | 1.310464  | -.240721   | 1.469424  | 0.870 | 1.101687 |
| 1 8   | -1.459607 | .6361259  | -1.347551 | 1.10832   | -.1120557  | 1.278076  | 0.930 | 1.109184 |
| 2 3 * | -.5629431 | 1.038896  | -.7744389 | .632.01   | .2114958   | .632.0108 | 1.000 | 1.035607 |
| 2 4 * | -.3830952 | .8017167  | -1.022998 | 1.209345  | .6399027   | 1.450746  | 0.659 | 1.081929 |
| 2 7 * | -.1269145 | 1.161561  | -1.298772 | 2.593752  | 1.171857   | 2.844386  | 0.680 | 1.09029  |
| 2 8   | -1.662751 | .6970765  | -1.022851 | 1.270827  | -.6398998  | 1.450731  | 0.659 | 1.081927 |
| 4 6   | .244354   | 1.144587  | -.9981778 | 1.060652  | 1.242532   | 1.560469  | 0.426 | 1.057041 |
| 4 7 * | .0634569  | 1.154287  | 1.23532   | 2.603474  | -1.171863  | 2.844385  | 0.680 | 1.090289 |
| 5 6   | .3127076  | .8493797  | .5534056  | 1.19796   | -.240698   | 1.469442  | 0.870 | 1.101691 |
| 6 8   | -.0667677 | 1.112287  | -.857622  | .9753308  | .7908544   | 1.479342  | 0.593 | 1.097911 |

\* Warning: all the evidence about these contrasts comes from the trials which directly compare them.

#### SUCRA and cumulative probability plots

| Treatm~t | SUCRA | PrBest | MeanRank |
|----------|-------|--------|----------|
| WL       | 24.5  | 0.0    | 6.3      |
| TAU      | 20.7  | 0.0    | 6.6      |
| SH+      | 46.5  | 14.9   | 4.7      |
| NET      | 46.2  | 2.3    | 4.8      |
| EMDR     | 78.8  | 30.7   | 2.5      |
| SSM      | 62.5  | 9.3    | 3.6      |
| SC       | 37.1  | 7.7    | 5.4      |
| CBT      | 83.6  | 35.1   | 2.1      |

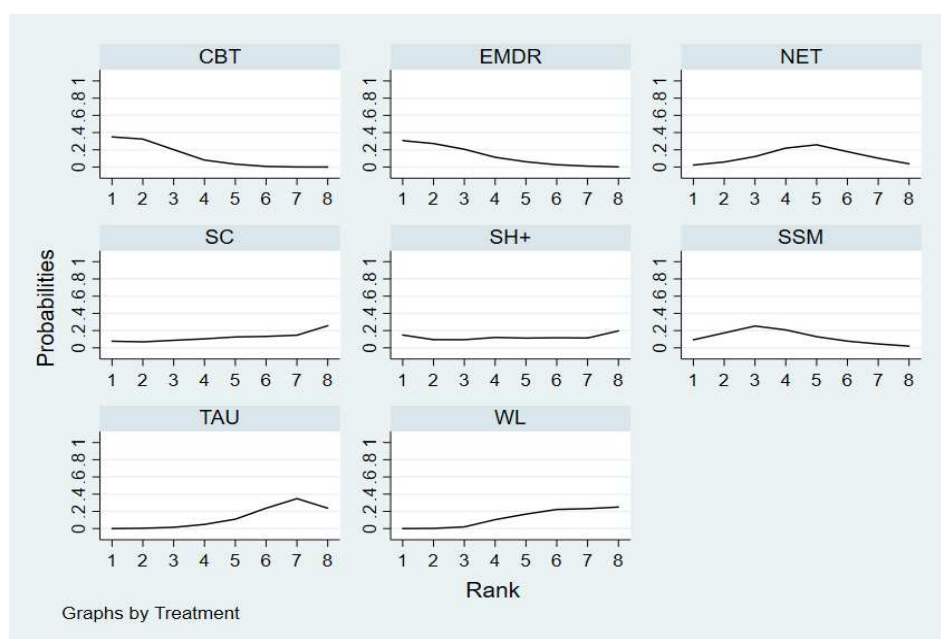

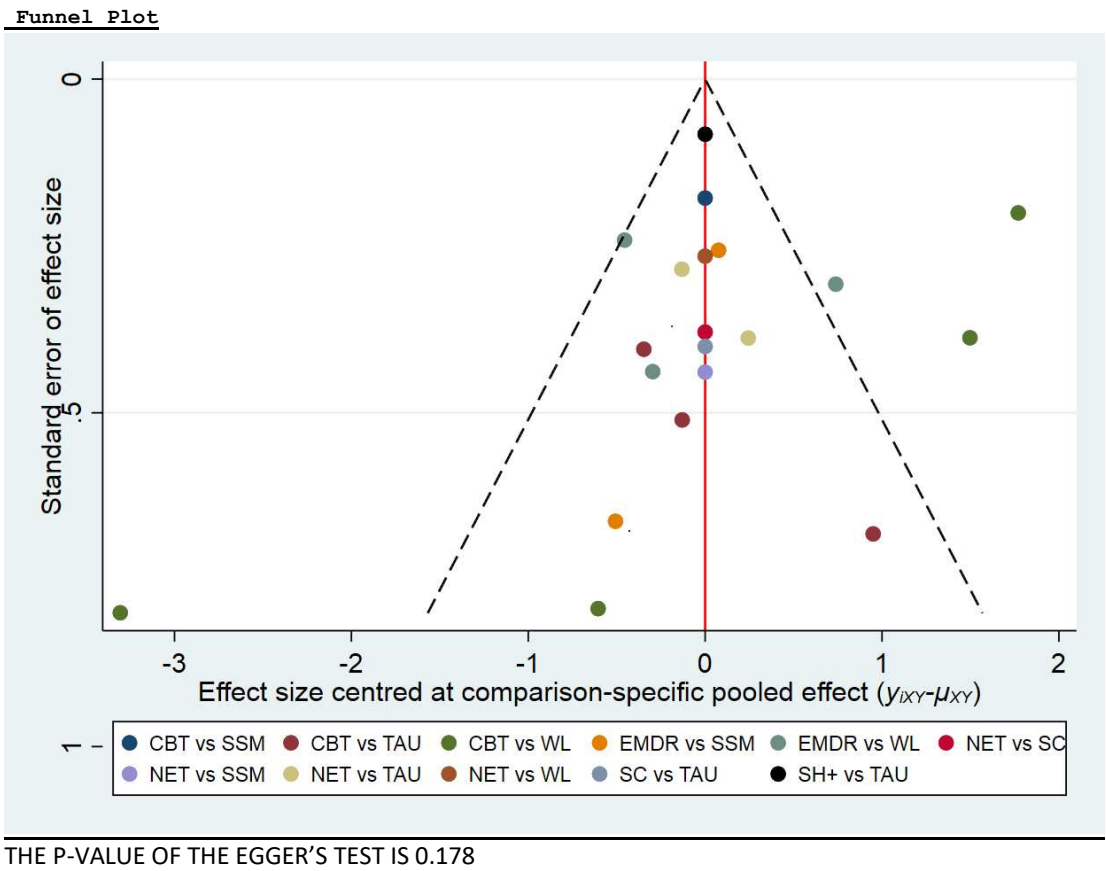

**CINeMA**

The analysis of the certainty of the evidence was performed with the online application CINeMA, which follows the principles of the GRADE methodology. The following criteria were applied:

- Within-study bias: the "overall" risk of bias of each study was calculated as follows: (a) LOW risk if three or more domains of the Cochrane RoB were at low risk; (b) HIGH risk if two or more domains were at high risk; (c) UNCLEAR RISK in all other cases. For each comparison, the histogram was interpreted according to a "Majority risk of bias" rule;
- Across-studies bias was considered "undetected" when was not possible to evaluate the risk of publication bias;
- Indirectness: the histogram was interpreted according to a "Majority risk of bias" rule;
- Imprecision: standardised mean difference between -0.700 to 0.700 was considered as a clinically important size of effect;
- Heterogeneity: standardised mean difference between -0.700 to 0.700 was considered as a clinically important size of effect;
- Incoherence: for all the comparisons for which only a direct or indirect estimation was available (Inconsistency measures: Not applicable) we reported "some concern".

**Within-study bias**

The bar chart shows the contributions of each piece of study to the network estimate.

Green=low risk; Yellow=unclear risk; Red=high risk

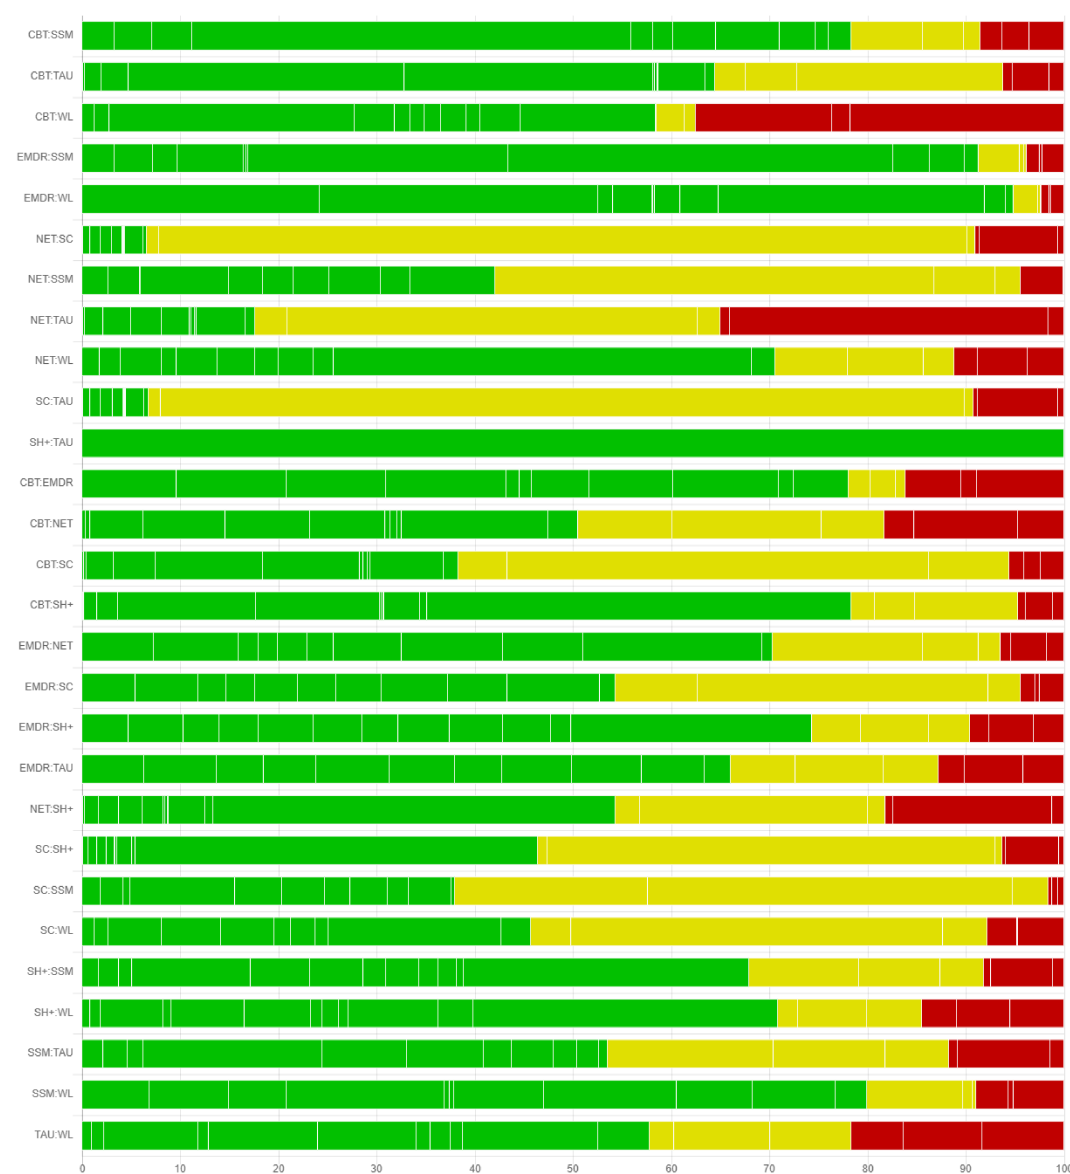

Indirectness

The bar chart shows the contributions of each study to the network estimate.  
Green=low risk; Yellow=unclear risk; Red=high risk

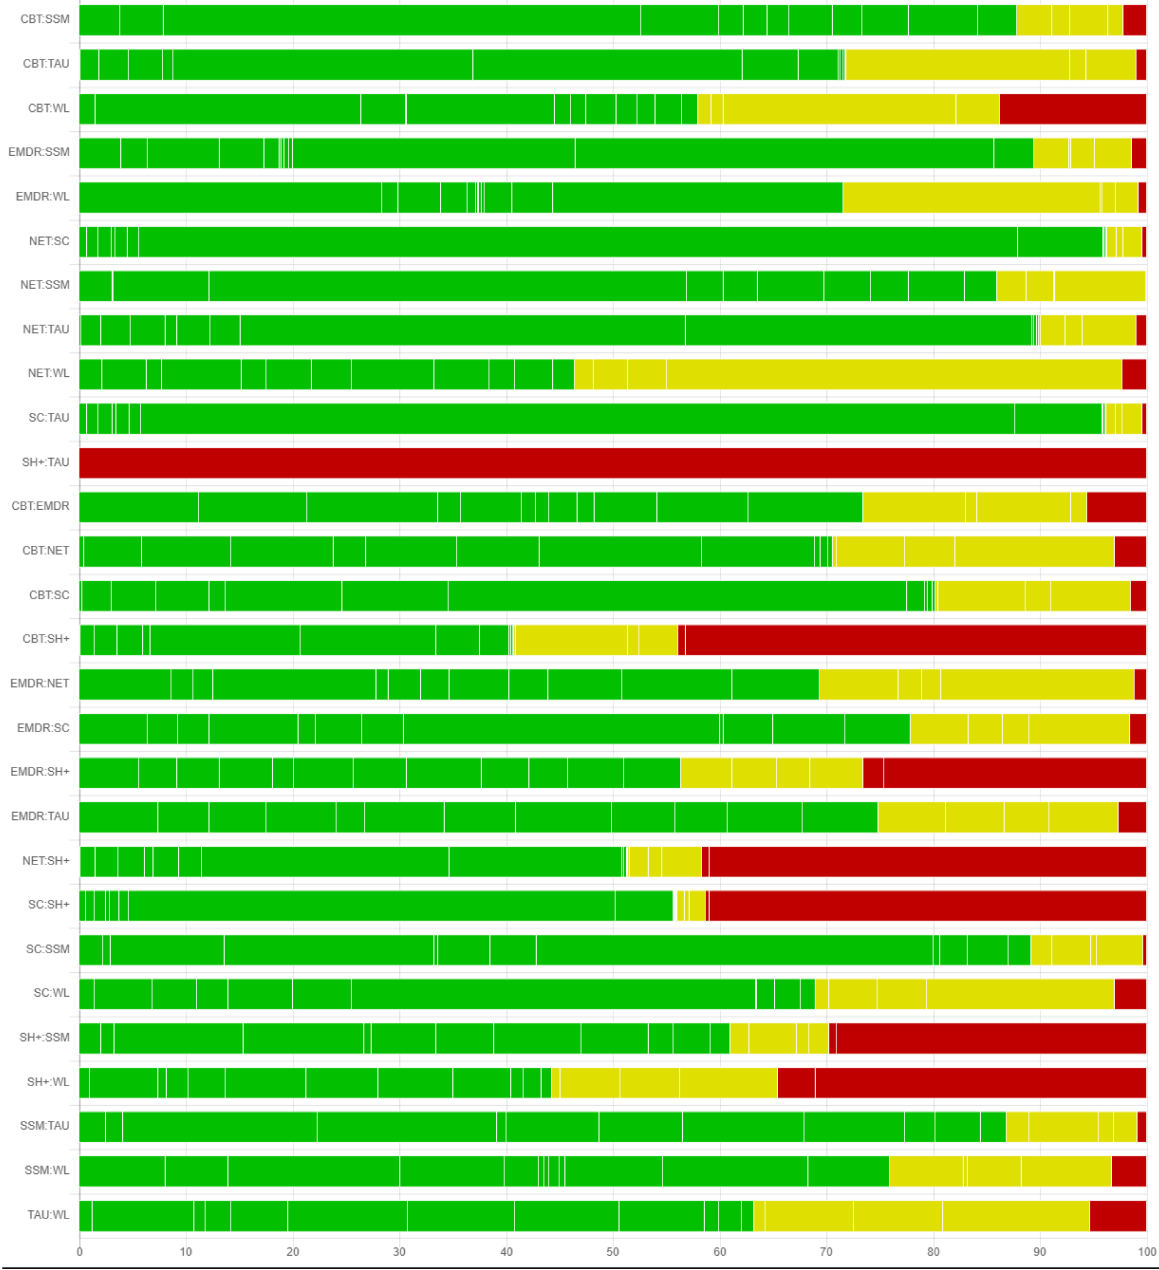

## Final report

| Comparison | Number of studies | Within-study bias | Reporting bias | Indirectness   | Imprecision    | Heterogeneity  | Incoherence | Confidence rating |
|------------|-------------------|-------------------|----------------|----------------|----------------|----------------|-------------|-------------------|
| CBT:SSM    | 1                 | No concerns       | Undetected     | No concerns    | Some concerns  | Some concerns  | No concerns | Low               |
| CBT:TAU    | 3                 | No concerns       | Undetected     | No concerns    | No concerns    | Some concerns  | No concerns | Moderate          |
| CBT:WL     | 4                 | No concerns       | Undetected     | No concerns    | No concerns    | Major concerns | No concerns | Low               |
| EMDR:SSM   | 2                 | No concerns       | Undetected     | No concerns    | Some concerns  | Some concerns  | No concerns | Low               |
| EMDR:WL    | 3                 | No concerns       | Undetected     | No concerns    | No concerns    | Major concerns | No concerns | Low               |
| NET:SC     | 1                 | Some concerns     | Undetected     | No concerns    | Major concerns | No concerns    | No concerns | Very low          |
| NET:SSM    | 1                 | Some concerns     | Undetected     | No concerns    | Major concerns | No concerns    | No concerns | Very low          |
| NET:TAU    | 2                 | Some concerns     | Undetected     | No concerns    | Some concerns  | Some concerns  | No concerns | Very low          |
| NET:WL     | 1                 | No concerns       | Undetected     | Some concerns  | Major concerns | No concerns    | No concerns | Very low          |
| SC:TAU     | 1                 | Some concerns     | Undetected     | No concerns    | Major concerns | No concerns    | No concerns | Very low          |
| SH+:TAU    | 1                 | No concerns       | Undetected     | Major concerns | Major concerns | No concerns    | No concerns | Very low          |
| CBT:EMDR   | 0                 | No concerns       | Undetected     | No concerns    | Major concerns | No concerns    | No concerns | Low               |
| CBT:NET    | 0                 | No concerns       | Undetected     | No concerns    | Some concerns  | Some concerns  | No concerns | Low               |
| CBT:SC     | 0                 | Some concerns     | Undetected     | No concerns    | Some concerns  | Some concerns  | No concerns | Very low          |
| CBT:SH+    | 0                 | No concerns       | Undetected     | Major concerns | Major concerns | No concerns    | No concerns | Very low          |
| EMDR:NET   | 0                 | No concerns       | Undetected     | No concerns    | Some concerns  | Some concerns  | No concerns | Low               |
| EMDR:SC    | 0                 | No concerns       | Undetected     | No concerns    | Major concerns | No concerns    | No concerns | Low               |
| EMDR:SH+   | 0                 | No concerns       | Undetected     | No concerns    | Major concerns | No concerns    | No concerns | Low               |
| EMDR:TAU   | 0                 | No concerns       | Undetected     | No concerns    | No concerns    | Major concerns | No concerns | Low               |
| NET:SH+    | 0                 | No concerns       | Undetected     | No concerns    | Major concerns | No concerns    | No concerns | Low               |
| SC:SH+     | 0                 | Some concerns     | Undetected     | No concerns    | Major concerns | No concerns    | No concerns | Very low          |
| SC:SSM     | 0                 | Some concerns     | Undetected     | No concerns    | Major concerns | No concerns    | No concerns | Very low          |
| SC:WL      | 0                 | Some concerns     | Undetected     | No concerns    | Major concerns | No concerns    | No concerns | Very low          |
| SH+:SSM    | 0                 | No concerns       | Undetected     | No concerns    | Major concerns | No concerns    | No concerns | Low               |
| SH+:WL     | 0                 | No concerns       | Undetected     | No concerns    | Major concerns | No concerns    | No concerns | Low               |
| SSM:TAU    | 0                 | No concerns       | Undetected     | No concerns    | Some concerns  | Some concerns  | No concerns | Low               |
| SSM:WL     | 0                 | No concerns       | Undetected     | No concerns    | Some concerns  | Some concerns  | No concerns | Low               |
| TAU:WL     | 0                 | No concerns       | Undetected     | No concerns    | Major concerns | No concerns    | No concerns | Low               |



Secondary outcome: depressive symptoms

Intervention codes:

|                                 |   |
|---------------------------------|---|
| Waiting List                    | 1 |
| Treatment as Usual              | 2 |
| Self-Help Plus                  | 3 |
| Narrative Exposure Therapy      | 4 |
| EMDR                            | 5 |
| Stabilization/Stress Management | 6 |
| Cognitive- Behavioural Therapy  | 7 |

Studies contributing to the analysis n= 13

Network map

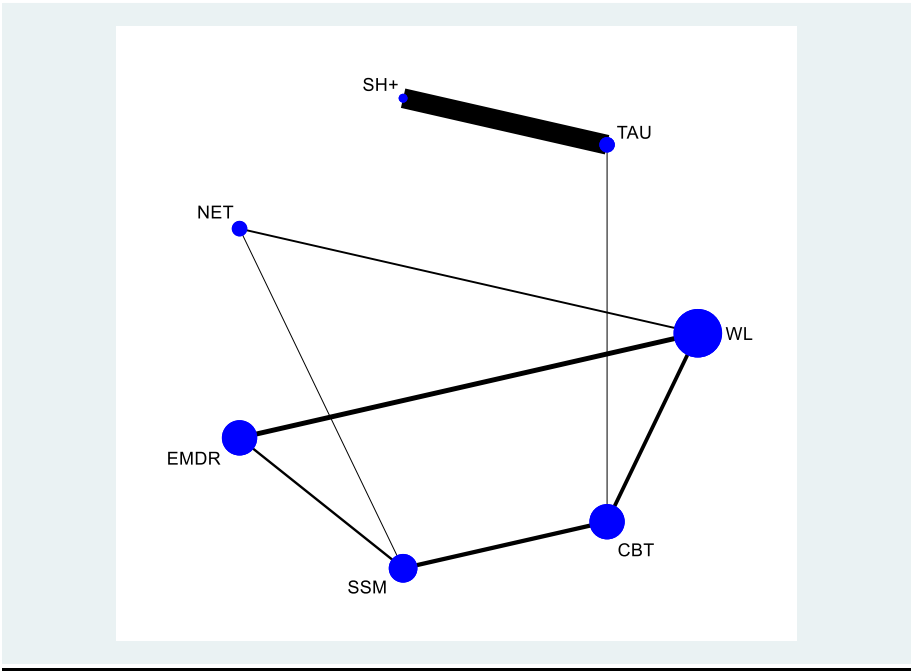

Net league table

|                            |                    |                    |                    |                    |                    |                   |
|----------------------------|--------------------|--------------------|--------------------|--------------------|--------------------|-------------------|
| <b>CBT</b>                 | 1.01 (-1.29,3.30)  | 1.22 (-1.73,4.17)  | -0.58 (-5.32,4.16) | 1.04 (-1.27,3.35)  | 0.00 (-3.46,3.46)  | 2.03 (0.19,3.87)  |
| -1.01 (-3.30,1.29)         | <b>EMDR</b>        | 0.21 (-2.57,2.99)  | -1.59 (-6.85,3.68) | 0.03 (-1.94,2.01)  | -1.01 (-5.16,3.15) | 1.02 (-0.68,2.73) |
| -1.22 (-4.17,1.73)         | -0.21 (-2.99,2.57) | <b>NET</b>         | -1.80 (-7.38,3.78) | -0.18 (-2.76,2.41) | -1.22 (-5.76,3.33) | 0.81 (-1.75,3.37) |
| 0.58 (-4.16,5.32)          | 1.59 (-3.68,6.85)  | 1.80 (-3.78,7.38)  | <b>SHplus</b>      | 1.62 (-3.65,6.89)  | 0.58 (-2.66,3.82)  | 2.61 (-2.47,7.69) |
| -1.04 (-3.35,1.27)         | -0.03 (-2.01,1.94) | 0.18 (-2.41,2.76)  | -1.62 (-6.89,3.65) | <b>SSM</b>         | -1.04 (-5.20,3.12) | 0.99 (-1.14,3.12) |
| -0.00 (-3.46,3.46)         | 1.01 (-3.15,5.16)  | 1.22 (-3.33,5.76)  | -0.58 (-3.82,2.66) | 1.04 (-3.12,5.20)  | <b>TAU</b>         | 2.03 (-1.89,5.95) |
| <b>-2.03 (-3.87,-0.19)</b> | -1.02 (-2.73,0.68) | -0.81 (-3.37,1.75) | -2.61 (-7.69,2.47) | -0.99 (-3.12,1.14) | -2.03 (-5.95,1.89) | <b>WL</b>         |

Interval plot

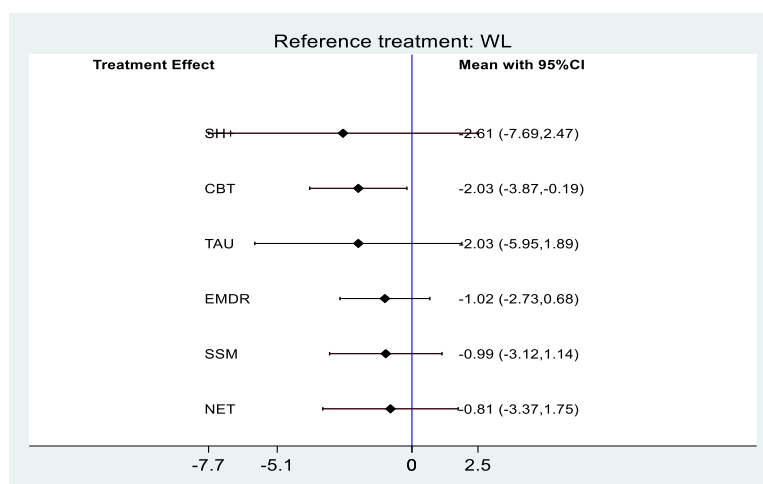

### Pairwise meta-analysis

| Study         | ES     | [95% Conf. Interval] |        |
|---------------|--------|----------------------|--------|
| -----         |        |                      |        |
| 5 - 1         |        |                      |        |
| 0             | -1.177 | -2.004               | -0.350 |
| 1             | -1.322 | -1.760               | -0.883 |
| 18            | 0.177  | -0.412               | 0.767  |
| Sub-total     |        |                      |        |
| D+L pooled ES | -0.770 | -1.773               | 0.233  |
| -----         |        |                      |        |
| 7 - 1         |        |                      |        |
| 3             | -0.195 | -0.589               | 0.198  |
| 6             | -1.838 | -3.275               | -0.401 |
| 21            | -6.346 | -8.265               | -4.427 |
| Sub-total     |        |                      |        |
| D+L pooled ES | -2.676 | -5.845               | 0.494  |
| -----         |        |                      |        |
| 7 - 6         |        |                      |        |
| 4             | 0.196  | -0.154               | 0.546  |
| Sub-total     |        |                      |        |
| D+L pooled ES | 0.196  | -0.154               | 0.546  |
| -----         |        |                      |        |
| 6 - 4         |        |                      |        |
| 5             | 0.358  | -0.528               | 1.243  |
| Sub-total     |        |                      |        |
| D+L pooled ES | 0.358  | -0.528               | 1.243  |
| -----         |        |                      |        |
| 7 - 2         |        |                      |        |
| 12            | 0.000  | -1.240               | 1.240  |
| Sub-total     |        |                      |        |
| D+L pooled ES | 0.000  | -1.240               | 1.240  |
| -----         |        |                      |        |
| 6 - 5         |        |                      |        |
| 15            | 0.906  | -0.448               | 2.261  |
| 16            | 0.016  | -0.483               | 0.514  |
| Sub-total     |        |                      |        |
| D+L pooled ES | 0.229  | -0.516               | 0.974  |
| -----         |        |                      |        |
| 4 - 1         |        |                      |        |
| 20            | -0.302 | -0.823               | 0.219  |
| Sub-total     |        |                      |        |
| D+L pooled ES | -0.302 | -0.823               | 0.219  |
| -----         |        |                      |        |
| 3 - 2         |        |                      |        |
| 22            | -0.579 | -0.741               | -0.417 |
| Sub-total     |        |                      |        |
| D+L pooled ES | -0.579 | -0.741               | -0.417 |
| -----         |        |                      |        |

### Test(s) of heterogeneity

|       | Heterogeneity statistic | degrees of freedom | P     | I-squared** | Tau-squared |
|-------|-------------------------|--------------------|-------|-------------|-------------|
| 5 - 1 | 16.72                   | 2                  | 0.000 | 88.0%       | 0.6825      |
| 7 - 1 | 41.26                   | 2                  | 0.000 | 95.2%       | 7.3520      |
| 7 - 6 | 0.00                    | 0                  | .     | .%          | 0.0000      |
| 6 - 4 | 0.00                    | 0                  | .     | .%          | 0.0000      |
| 7 - 2 | 0.00                    | 0                  | .     | .%          | 0.0000      |
| 6 - 5 | 1.46                    | 1                  | 0.226 | 31.6%       | 0.1255      |
| 4 - 1 | 0.00                    | 0                  | .     | .%          | 0.0000      |
| 3 - 2 | 0.00                    | 0                  | .     | .%          | 0.0000      |

\*\* I-squared: the variation in ES attributable to heterogeneity)

### **Evaluation of heterogeneity and incoherence**

#### Overall heterogeneity in the inconsistency model

Estimated between-studies SD: 1.882

#### Overall heterogeneity in the consistency model

Estimated between-studies SD: 1.649

#### Overall incoherence

Design-by-treatment test: P=0.63

#### Loop-specific heterogeneity

\* 3 quadratic loops found

Evaluation of inconsistency using loop-specific heterogeneity estimates:

| Loop            | IF    | seIF  | z_value | p_value | CI_95        | Loop_Heterog_tau2 |
|-----------------|-------|-------|---------|---------|--------------|-------------------|
| WL-SH+-EMDR-SSM | 2.927 | 5.635 | 0.520   | 0.603   | (0.00,13.97) | 7.352             |
| WL-NET-EMDR-SSM | 2.231 | 2.812 | 0.793   | 0.428   | (0.00,7.74)  | 1.780             |
| WL-SH+-NET-EMDR | 0.470 | 1.457 | 0.323   | 0.747   | (0.00,3.33)  | 0.601             |

#### Consistency between direct and indirect estimates

| Side  | Direct Coef. | Std. Err. | Indirect Coef. | Std. Err. | Difference Coef. | Std. Err. | P> z  | tau      |
|-------|--------------|-----------|----------------|-----------|------------------|-----------|-------|----------|
| 1 4   | -.3018354    | 1.815645  | -1.629583      | 2.27514   | 1.327747         | 2.910813  | 0.648 | 1.796094 |
| 1 5   | -.7724727    | 1.049202  | -2.05504       | 2.099598  | 1.282567         | 2.347123  | 0.585 | 1.788052 |
| 1 7   | -2.514686    | 1.056201  | -.0268988      | 2.140657  | -2.487787        | 2.387838  | 0.297 | 1.67307  |
| 2 3 * | -.5791176    | 1.651195  | 3.481416       | 632.4952  | -4.060533        | 632.4973  | 0.995 | 1.649123 |
| 2 7 * | -1.63e-06    | 1.766243  | -2.436273      | 282.8538  | 2.436271         | 282.8596  | 0.993 | 1.649126 |
| 4 6   | .3577437     | 1.852069  | -.9700686      | 2.245624  | 1.327812         | 2.91084   | 0.648 | 1.796097 |
| 5 6   | .4343449     | 1.314638  | -.8483479      | 1.94375   | 1.282693         | 2.347191  | 0.585 | 1.788062 |
| 6 7   | .1959733     | 1.682592  | -2.291758      | 1.694466  | 2.487731         | 2.387956  | 0.298 | 1.673082 |

\* Warning: all the evidence about these contrasts comes from the trials which directly compare them.

### **SUCRA and cumulative probability plots**

| Treatm~t | SUCRA | PrBest | MeanRank |
|----------|-------|--------|----------|
| WL       | 14.8  | 0.1    | 6.1      |
| TAU      | 62.9  | 15.9   | 3.2      |
| SH+      | 70.5  | 45.1   | 2.8      |
| NET      | 40.4  | 7.8    | 4.6      |
| EMDR     | 45.9  | 5.7    | 4.2      |
| SSM      | 43.8  | 4.6    | 4.4      |
| CBT      | 71.8  | 20.7   | 2.7      |

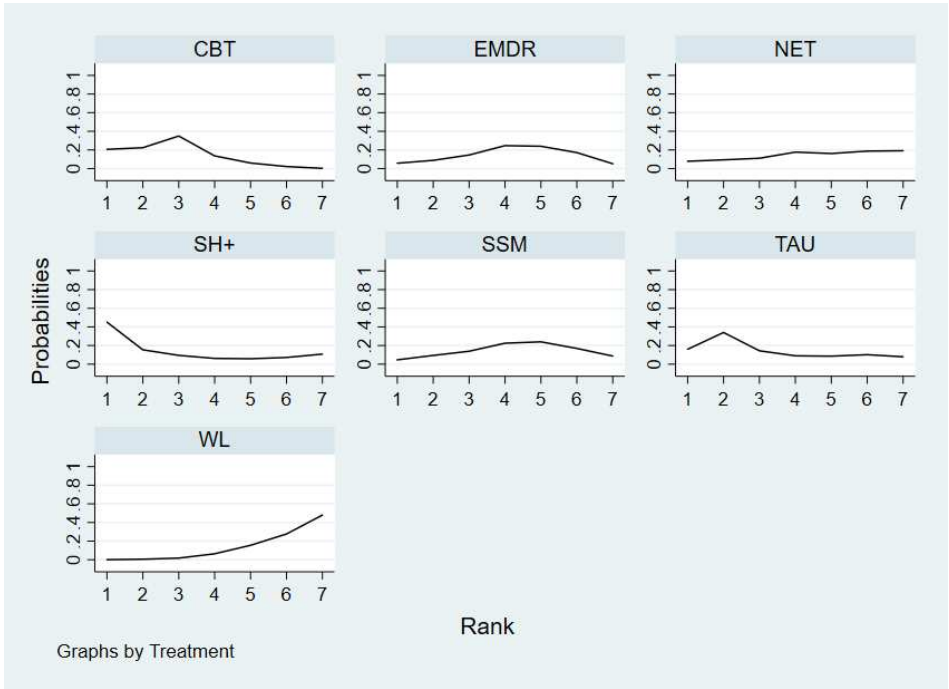

## Secondary outcome: anxiety symptoms

### Intervention codes:

|                                 |   |
|---------------------------------|---|
| Waiting List                    | 1 |
| Treatment as Usual              | 2 |
| EMDR                            | 3 |
| Stabilization/Stress Management | 4 |
| Cognitive- Behavioural Therapy  | 5 |

### Studies contributing to the analysis n= 11

#### Network map

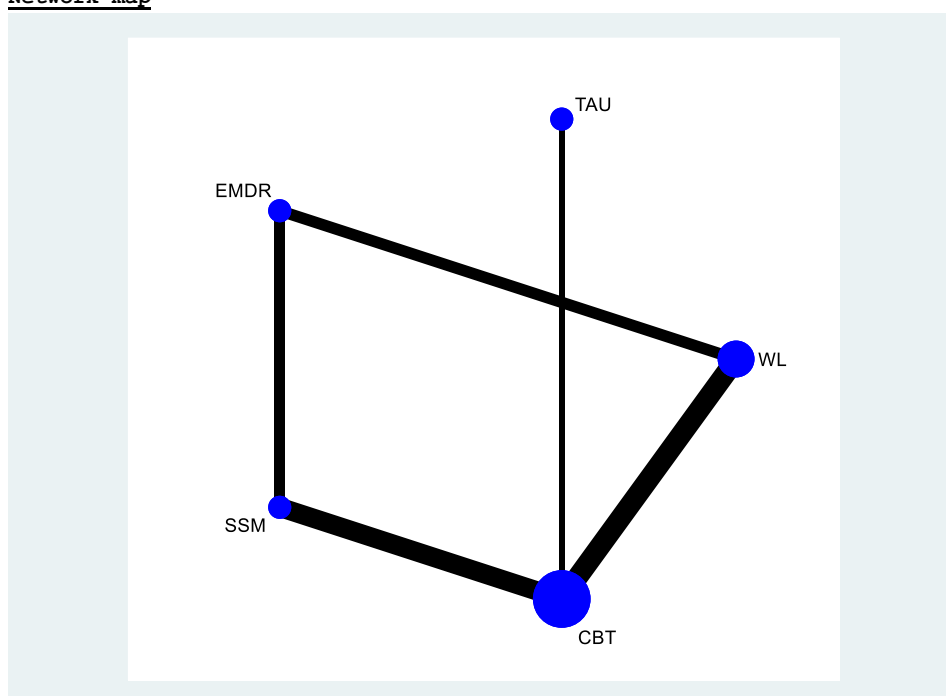

#### Net league table

| CBT                        | -0.02 (-2.83,2.79) | 0.19 (-2.51,2.88)  | 2.34 (0.30,4.38)  | 1.97 (0.28,3.67)   |
|----------------------------|--------------------|--------------------|-------------------|--------------------|
| 0.02 (-2.79,2.83)          | EMDR               | 0.21 (-2.00,2.41)  | 2.36 (-1.11,5.83) | 1.99 (-0.71,4.69)  |
| -0.19 (-2.88,2.51)         | -0.21 (-2.41,2.00) | SSM                | 2.15 (-1.23,5.53) | 1.79 (-1.02,4.59)  |
| <b>-2.34 (-4.38,-0.30)</b> | -2.36 (-5.83,1.11) | -2.15 (-5.53,1.23) | TAU               | -0.36 (-3.02,2.29) |
| <b>-1.97 (-3.67,-0.28)</b> | -1.99 (-4.69,0.71) | -1.79 (-4.59,1.02) | 0.36 (-2.29,3.02) | WL                 |

**Interval plot**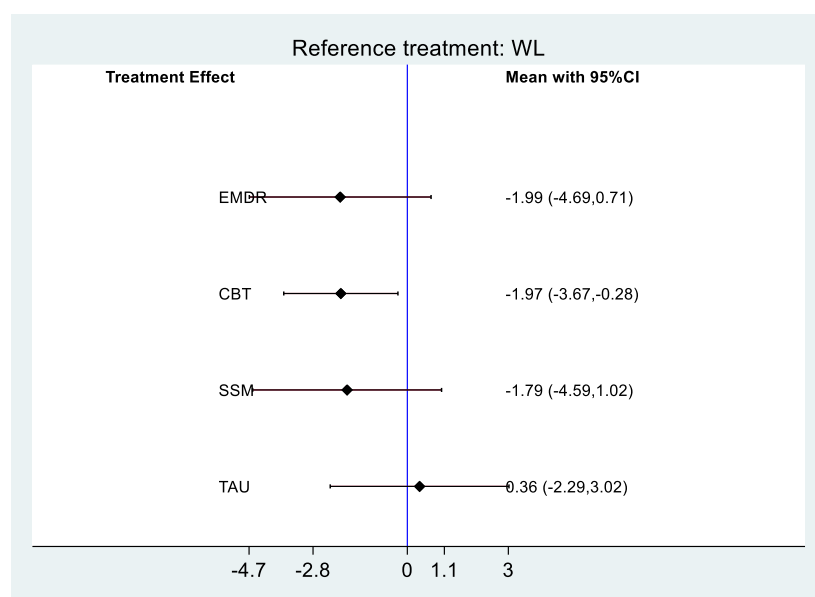**Pairwise meta-analysis**

| Study         | ES     | [95% Conf. Interval] |        |
|---------------|--------|----------------------|--------|
| 3 - 1         |        |                      |        |
| 1             | -1.564 | -2.018               | -1.109 |
| Sub-total     |        |                      |        |
| D+L pooled ES | -1.564 | -2.018               | -1.109 |
| 5 - 1         |        |                      |        |
| 3             | -0.344 | -0.739               | 0.052  |
| 6             | -2.038 | -3.536               | -0.540 |
| 19            | -0.772 | -1.559               | 0.015  |
| 21            | -6.043 | -7.886               | -4.200 |
| Sub-total     |        |                      |        |
| D+L pooled ES | -2.065 | -3.719               | -0.411 |
| 5 - 4         |        |                      |        |
| 4             | 0.240  | -0.110               | 0.591  |
| Sub-total     |        |                      |        |
| D+L pooled ES | 0.240  | -0.110               | 0.591  |
| 5 - 2         |        |                      |        |
| 7             | -3.701 | -4.765               | -2.638 |
| 8             | -2.731 | -3.907               | -1.554 |
| 12            | -0.521 | -1.800               | 0.758  |
| Sub-total     |        |                      |        |
| D+L pooled ES | -2.345 | -4.148               | -0.542 |
| 4 - 3         |        |                      |        |
| 15            | 0.576  | -0.711               | 1.863  |
| 16            | 0.307  | -0.194               | 0.808  |
| Sub-total     |        |                      |        |
| D+L pooled ES | 0.342  | -0.125               | 0.809  |

**Test(s) of heterogeneity**

|       | Heterogeneity statistic | degrees of freedom | P     | I-squared** % | Tau-squared |
|-------|-------------------------|--------------------|-------|---------------|-------------|
| 3 - 1 | 0.00                    | 0                  | .     | .             | 0.0000      |
| 5 - 1 | 38.51                   | 3                  | 0.000 | 92.2%         | 2.4687      |

|       |       |   |       |              |
|-------|-------|---|-------|--------------|
| 5 - 4 | 0.00  | 0 | .     | 0.0000       |
| 5 - 2 | 14.25 | 2 | 0.001 | 86.0% 2.1808 |
| 4 - 3 | 0.15  | 1 | 0.703 | 0.0% 0.0000  |

\*\* I-squared: the variation in ES attributable to heterogeneity

### **Evaluation of heterogeneity and incoherence**

Overall heterogeneity in the inconsistency model  
Estimated between-studies SD: 1.864

Overall heterogeneity in the consistency model  
Estimated between-studies SD: 1.700

Overall incoherence  
Design-by-treatment test: P=0.69

### **Loop-specific heterogeneity**

\* 1 quadratic loops found

Evaluation of inconsistency using loop-specific heterogeneity estimates:

| Loop            | IF    | seIF  | z_value | p_value | CI_95       | Loop_Heterog_tau2 |
|-----------------|-------|-------|---------|---------|-------------|-------------------|
| WL-EMDR-SSM-CBT | 1.114 | 3.326 | 0.335   | 0.738   | (0.00,7.63) | 1.882             |

### **Evaluation of incoherence**

| Side  | Direct    |           | Indirect  |           | Difference |           | tau   |
|-------|-----------|-----------|-----------|-----------|------------|-----------|-------|
|       | Coef.     | Std. Err. | Coef.     | Std. Err. | Coef.      | Std. Err. | P> z  |
| 1 3   | -1.563919 | 1.878099  | -2.798268 | 2.517532  | 1.234349   | 3.140895  | 0.694 |
| 1 5   | -2.123547 | .9878901  | -.8890099 | 2.980842  | -1.234537  | 3.140409  | 0.694 |
| 2 5 * | -2.339161 | 1.040875  | -1.609427 | 365.158   | -.7297339  | 365.1598  | 0.998 |
| 3 4   | .4346981  | 1.362523  | -.7999359 | 2.829962  | 1.234634   | 3.141018  | 0.694 |
| 4 5   | .2403762  | 1.872293  | -.9945167 | 2.521927  | 1.234893   | 3.140955  | 0.694 |

\* Warning: all the evidence about these contrasts comes from the trials which directly compare them.

\* Warning: all the evidence about these contrasts comes from the trials which directly compare them.

### **SUCRA and cumulative probability plots**

| Treatm~t | SUCRA | PrBest | MeanRank |
|----------|-------|--------|----------|
| WL       | 20.0  | 0.1    | 4.2      |
| TAU      | 15.0  | 0.6    | 4.4      |
| EMDR     | 73.1  | 36.6   | 2.1      |
| SSM      | 66.6  | 24.4   | 2.3      |
| CBT      | 75.3  | 38.2   | 2.0      |

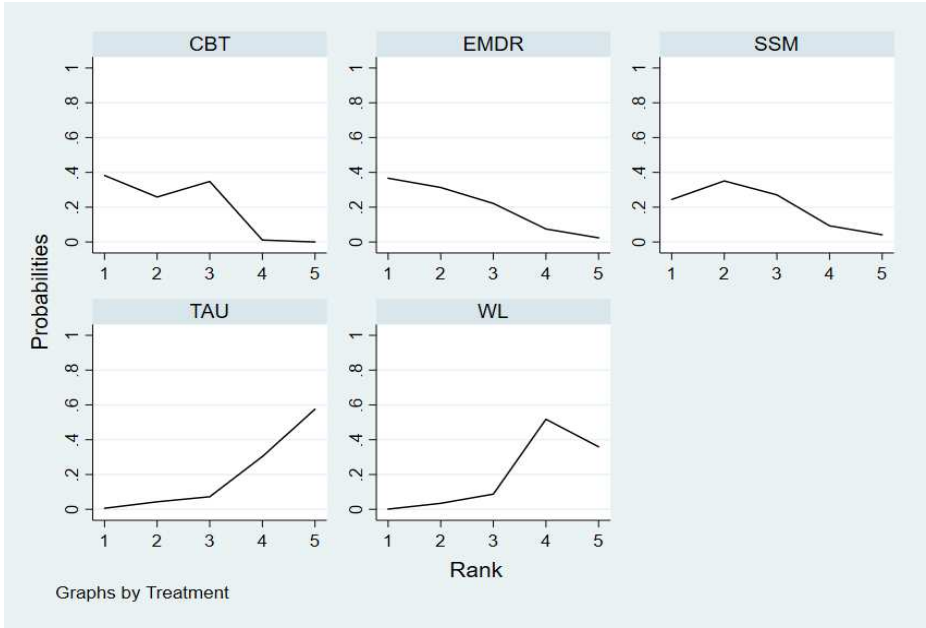



Secondary outcome: functioning

Intervention codes:

|                                 |   |
|---------------------------------|---|
| Waiting List                    | 1 |
| Treatment as Usual              | 2 |
| Self-Help Plus                  | 3 |
| Stabilization/Stress Management | 4 |
| Cognitive-Behavioural Therapy   | 5 |

Studies contributing to the analysis n= 2

Network map

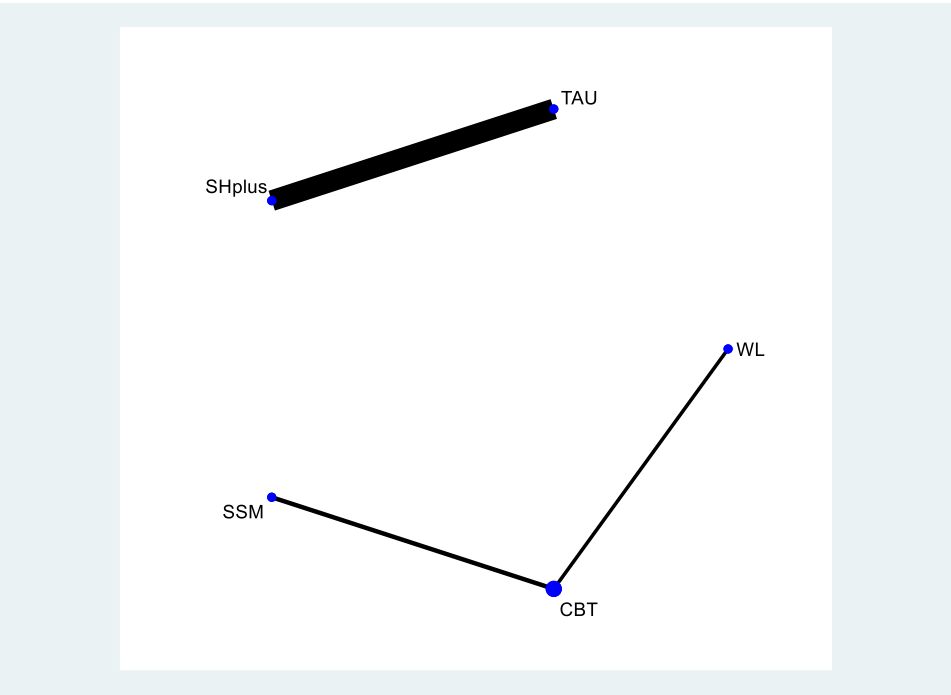

```
. indirect _y _stderr study ordne , fixed eff() tabl trta(_t1) trtb(_t2)
```

| Study         |  | ES    | [95% Conf. Interval] |       | % Weight |
|---------------|--|-------|----------------------|-------|----------|
| Buhmann 2016  |  | 0.113 | -0.279               | 0.506 | 100.00   |
| I-V pooled ES |  | 0.113 | -0.279               | 0.506 | 100.00   |

Heterogeneity chi-squared = 0.00 (d.f. = 0) p = .  
I-squared (variation in ES attributable to heterogeneity) = .%

Test of ES=0 : z= 0.57 p = 0.572  
Meta-Analysis: comparing treatments 1 and 5  
Exponential Statistic = 1.12  
Log statistic ln() = .113 and standard error = .2 (var = .04)

| Study         |  | ES    | [95% Conf. Interval] |       | % Weight |
|---------------|--|-------|----------------------|-------|----------|
| Carlsson 2018 |  | 0.098 | -0.252               | 0.447 | 100.00   |

```
I-V pooled ES      |  0.098      -0.252      0.447      100.00
-----+-----

Heterogeneity chi-squared =   0.00 (d.f. = 0) p =      .
I-squared (variation in ES attributable to heterogeneity) =      .%

Test of ES=0 : z=   0.55 p = 0.583
-----
Meta-Analysis: comparing treatments 4   and   5
Exponential Statistic = 1.103
Log statistic ln() = .098 and standard error = .178 (var = .032)
-----
-----
Indirect comparison: 1 vs 4
Exponential Statistic =1.015 with CI [ .6, 1.718]
Log statistic ln() = .015 and standard error = .268 (var = .072)
Confidence Interval: [-.51, .541]
Heterogeneity statistic ChiSquared: =.003, p-value: = .955
```

Secondary outcome: wellbeing/quality of life

Intervention codes:

ALL STUDIES

|                                 |   |
|---------------------------------|---|
| Waiting List                    | 1 |
| Treatment as Usual              | 2 |
| Self-Help Plus                  | 3 |
| Narrative Exposure Therapy      | 4 |
| EMDR                            | 5 |
| Stabilization/Stress Management | 6 |
| Supportive Counseling           | 7 |

ONLY CONNECTED

|                            |   |
|----------------------------|---|
| Waiting List               | 1 |
| Treatment as Usual         | 2 |
| Self-Help Plus             | 3 |
| Narrative Exposure Therapy | 4 |
| Supportive Counseling      | 5 |

Studies contributing to the analysis

- All studies n= 4
- Only connected n= 3

Network map

ALL STUDIES

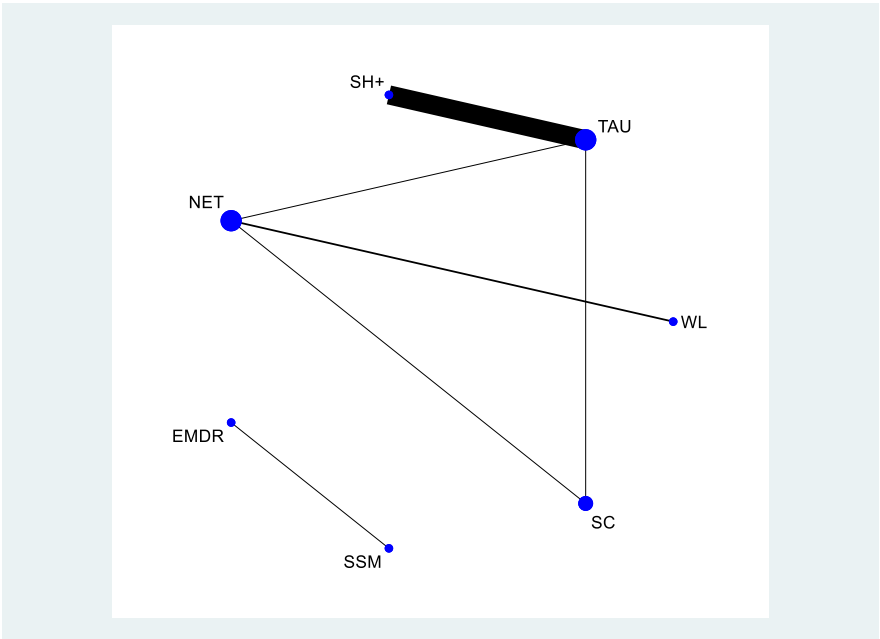

ONLY CONNECTED

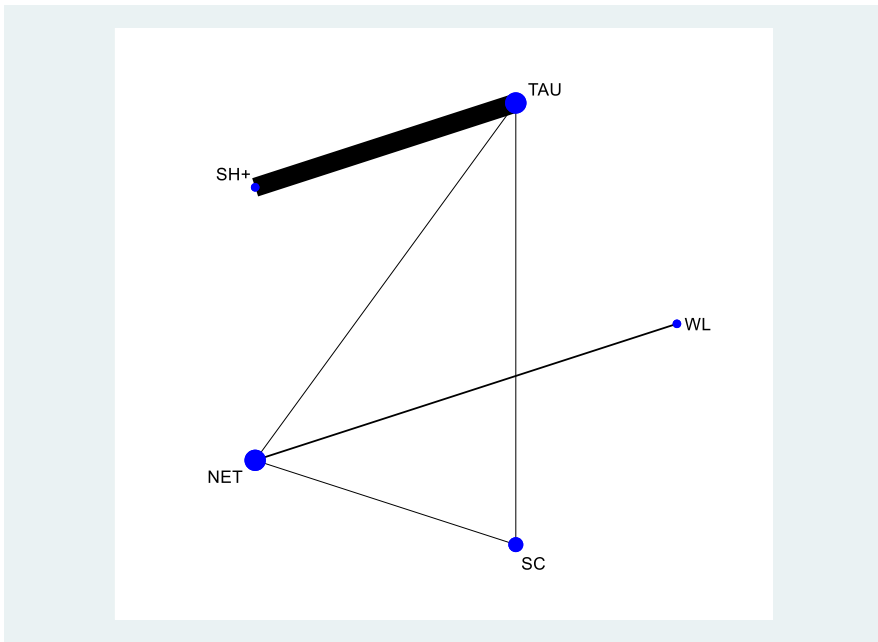

Net league table

|                     |                     |                    |                      |                     |
|---------------------|---------------------|--------------------|----------------------|---------------------|
| NET                 | -0.15 (-0.89, 0.59) | 0.26 (-0.52, 1.03) | -0.15 (-0.91, 0.61)  | -0.37 (-0.89, 0.16) |
| 0.15 (-0.59, 0.89)  | SC                  | 0.41 (-0.39, 1.21) | -0.00 (-0.78, 0.78)  | -0.22 (-1.13, 0.69) |
| -0.26 (-1.03, 0.52) | -0.41 (-1.21, 0.39) | SHplus             | -0.41 (-0.57, -0.25) | -0.62 (-1.56, 0.31) |
| 0.15 (-0.61, 0.91)  | 0.00 (-0.78, 0.78)  | 0.41 (0.25, 0.57)  | TAU                  | -0.22 (-1.14, 0.71) |
| 0.37 (-0.16, 0.89)  | 0.22 (-0.69, 1.13)  | 0.62 (-0.31, 1.56) | 0.22 (-0.71, 1.14)   | WL                  |

Interval plot

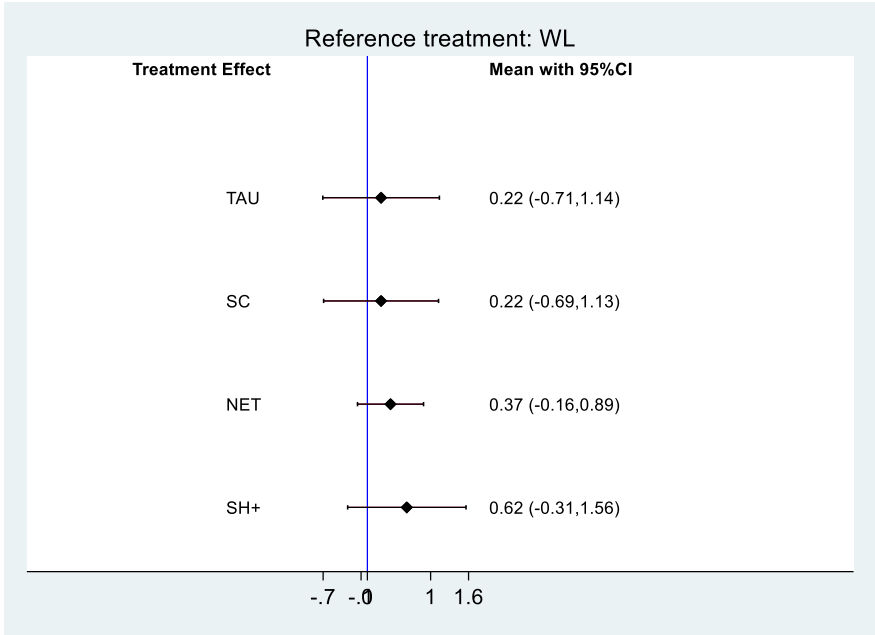

**Pairwise meta-analysis**

## ALL STUDIES

| Study         |  | ES     | [95% Conf. Interval] |       |
|---------------|--|--------|----------------------|-------|
| -----         |  |        |                      |       |
| 4 - 2         |  |        |                      |       |
| 9             |  | 0.149  | -0.611               | 0.909 |
| Sub-total     |  |        |                      |       |
| D+L pooled ES |  | 0.149  | -0.611               | 0.909 |
| -----         |  |        |                      |       |
| 7 - 2         |  |        |                      |       |
| 9             |  | 0.000  | -0.785               | 0.785 |
| Sub-total     |  |        |                      |       |
| D+L pooled ES |  | 0.000  | -0.785               | 0.785 |
| -----         |  |        |                      |       |
| 7 - 4         |  |        |                      |       |
| 9             |  | -0.149 | -0.893               | 0.594 |
| Sub-total     |  |        |                      |       |
| D+L pooled ES |  | -0.149 | -0.893               | 0.594 |
| -----         |  |        |                      |       |
| 6 - 5         |  |        |                      |       |
| 15            |  | -0.957 | -2.324               | 0.410 |
| Sub-total     |  |        |                      |       |
| D+L pooled ES |  | -0.957 | -2.324               | 0.410 |
| -----         |  |        |                      |       |
| 4 - 1         |  |        |                      |       |
| 20            |  | 0.366  | -0.156               | 0.888 |
| Sub-total     |  |        |                      |       |
| D+L pooled ES |  | 0.366  | -0.156               | 0.888 |
| -----         |  |        |                      |       |
| 3 - 2         |  |        |                      |       |
| 22            |  | 0.407  | 0.247                | 0.568 |
| Sub-total     |  |        |                      |       |
| D+L pooled ES |  | 0.407  | 0.247                | 0.568 |
| -----         |  |        |                      |       |

## ONLY CONNECTED

| Study         |  | ES     | [95% Conf. Interval] |       |
|---------------|--|--------|----------------------|-------|
| -----         |  |        |                      |       |
| 4 - 2         |  |        |                      |       |
| 9             |  | 0.149  | -0.611               | 0.909 |
| Sub-total     |  |        |                      |       |
| D+L pooled ES |  | 0.149  | -0.611               | 0.909 |
| -----         |  |        |                      |       |
| 5 - 2         |  |        |                      |       |
| 9             |  | 0.000  | -0.785               | 0.785 |
| Sub-total     |  |        |                      |       |
| D+L pooled ES |  | 0.000  | -0.785               | 0.785 |
| -----         |  |        |                      |       |
| 5 - 4         |  |        |                      |       |
| 9             |  | -0.149 | -0.893               | 0.594 |
| Sub-total     |  |        |                      |       |
| D+L pooled ES |  | -0.149 | -0.893               | 0.594 |
| -----         |  |        |                      |       |
| 4 - 1         |  |        |                      |       |
| 20            |  | 0.366  | -0.156               | 0.888 |
| Sub-total     |  |        |                      |       |
| D+L pooled ES |  | 0.366  | -0.156               | 0.888 |
| -----         |  |        |                      |       |
| 3 - 2         |  |        |                      |       |
| 22            |  | 0.407  | 0.247                | 0.568 |
| Sub-total     |  |        |                      |       |
| D+L pooled ES |  | 0.407  | 0.247                | 0.568 |
| -----         |  |        |                      |       |

\*\*\*\*\* NO TEST OF HETEROGENEITY (1 study per each comparison): Fixed effects\*\*\*\*\*

\*\*\* NO CONSISTENCY PLOT (no pair for which direct and indirect comparison available at the same time): Consistency by definition \*\*\*

SUCRA and cumulative probability plots

| Treatm~t | SUCRA | PrBest | MeanRank |
|----------|-------|--------|----------|
| WL       | 21.0  | 2.8    | 4.2      |
| TAU      | 38.0  | 0.0    | 3.5      |
| SH+      | 87.3  | 67.4   | 1.5      |
| NET      | 62.4  | 20.1   | 2.5      |
| SC       | 41.4  | 9.7    | 3.3      |

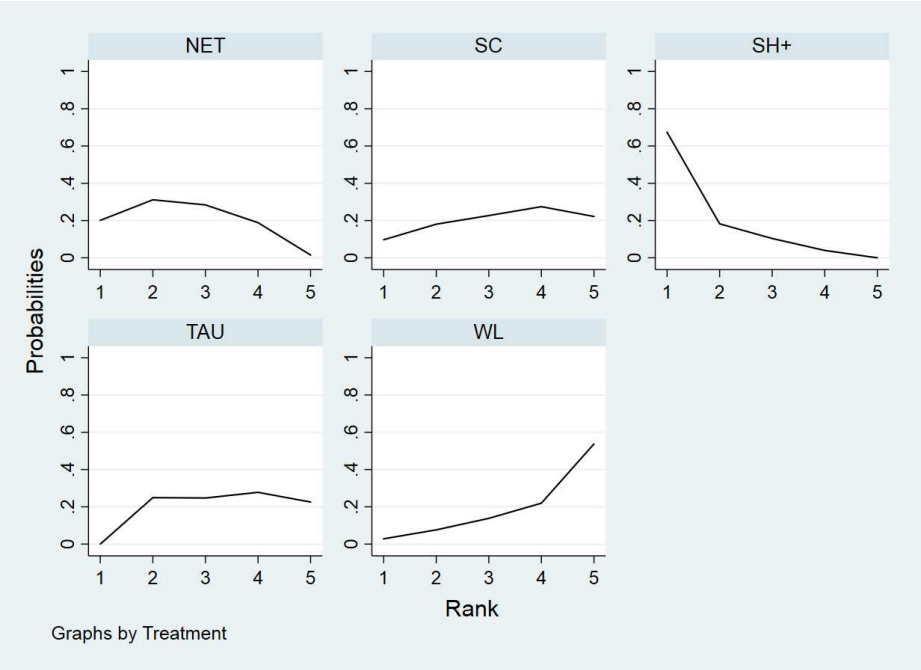

\*\*\*\*\* NO FUNNEL PLOT (1 study per comparison)\*\*\*\*\*

## Secondary outcome: acceptability

### Intervention codes:

|                                 |   |
|---------------------------------|---|
| Waiting List                    | A |
| Treatment as Usual              | B |
| Self-Help Plus                  | C |
| Narrative Exposure Therapy      | D |
| EMDR                            | E |
| Stabilization/Stress Management | F |
| Supportive Counseling           | G |
| Cognitive-Behavioural Therapy   | H |

### Studies contributing to the analysis n= 20

#### Network map

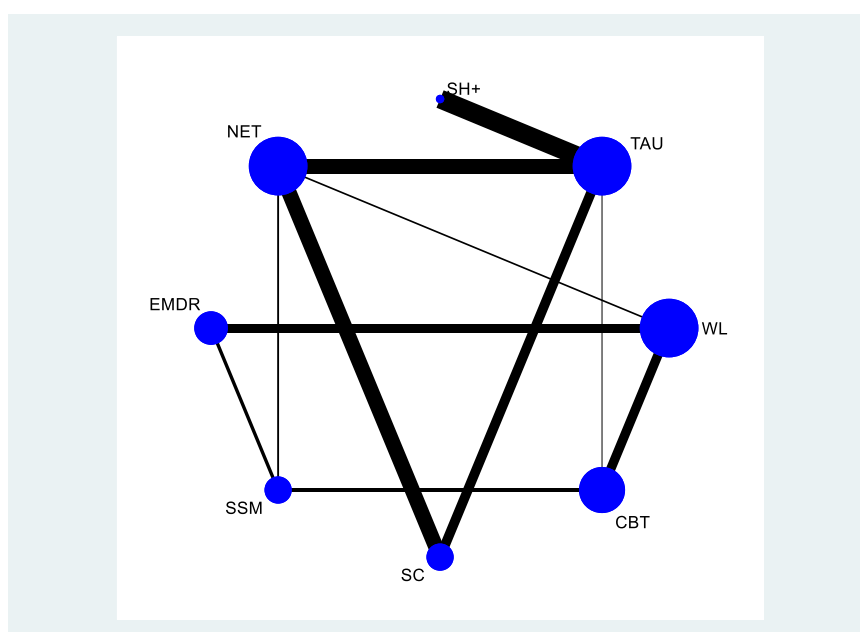

#### Net league table

| CBT              | 1.98 (0.88,4.50) | 1.00 (0.32,3.13) | 0.81 (0.23,2.79) | 1.61 (0.44,5.95) | 1.31 (0.57,3.02) | 0.95 (0.28,3.22)        | 1.11 (0.60,2.04) |
|------------------|------------------|------------------|------------------|------------------|------------------|-------------------------|------------------|
| 0.50 (0.22,1.14) | EMDR             | 0.50 (0.15,1.66) | 0.41 (0.11,1.47) | 0.81 (0.21,3.15) | 0.66 (0.28,1.54) | 0.48 (0.13,1.71)        | 0.56 (0.29,1.06) |
| 1.00 (0.32,3.13) | 1.98 (0.60,6.52) | NET              | 0.81 (0.49,1.34) | 1.61 (0.80,3.25) | 1.31 (0.44,3.94) | 0.95 (0.56,1.60)        | 1.11 (0.37,3.33) |
| 1.24 (0.36,4.28) | 2.46 (0.68,8.89) | 1.24 (0.75,2.06) | SC               | 1.99 (0.93,4.27) | 1.62 (0.49,5.42) | 1.18 (0.65,2.14)        | 1.38 (0.41,4.58) |
| 0.62 (0.17,2.30) | 1.23 (0.32,4.79) | 0.62 (0.31,1.26) | 0.50 (0.23,1.07) | SHplus           | 0.81 (0.23,2.94) | <b>0.59 (0.37,0.94)</b> | 0.69 (0.19,2.47) |
| 0.76 (0.33,1.76) | 1.51 (0.65,3.53) | 0.76 (0.25,2.30) | 0.62 (0.18,2.05) | 1.23 (0.34,4.43) | SSM              | 0.72 (0.22,2.39)        | 0.85 (0.36,1.98) |
| 1.05 (0.31,3.57) | 2.09 (0.59,7.46) | 1.05 (0.62,1.78) | 0.85 (0.47,1.55) | 1.70 (1.06,2.72) | 1.38 (0.42,4.56) | TAU                     | 1.17 (0.36,3.83) |
| 0.90 (0.49,1.65) | 1.79 (0.94,3.39) | 0.90 (0.30,2.70) | 0.73 (0.22,2.42) | 1.45 (0.40,5.20) | 1.18 (0.51,2.75) | 0.85 (0.26,2.80)        | WL               |

#### Interval plot

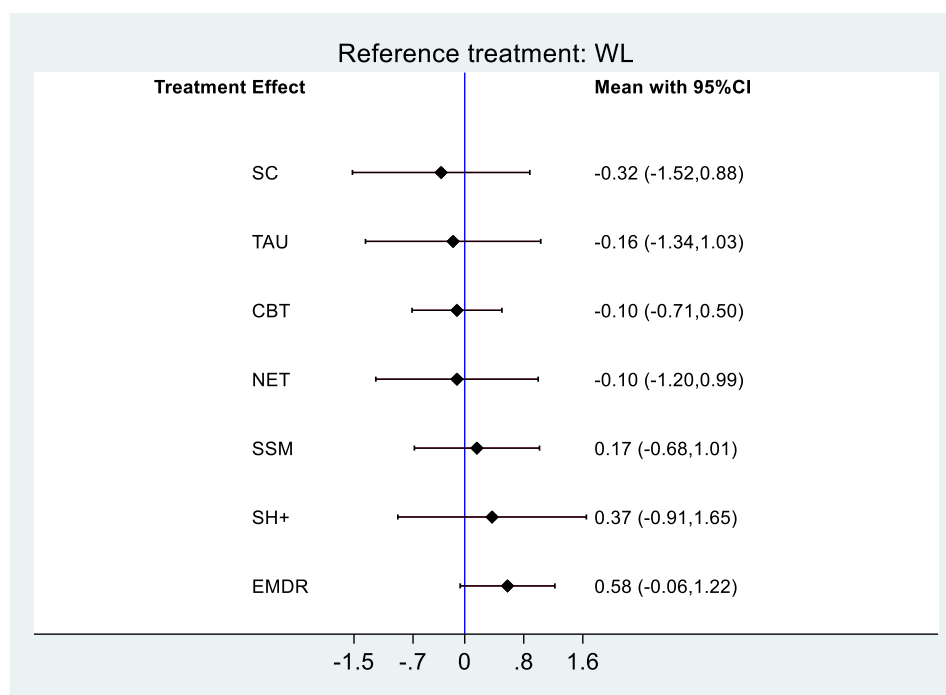**Pairwise meta-analysis**

| Study         |  | ES    | [95% Conf. Interval] |        |
|---------------|--|-------|----------------------|--------|
| -----+-----   |  |       |                      |        |
| E - A         |  |       |                      |        |
| 0             |  | 1.069 | 0.020                | 57.483 |
| 1             |  | 0.835 | 0.363                | 1.921  |
| 18            |  | 0.143 | 0.036                | 0.573  |
| Sub-total     |  |       |                      |        |
| D+L pooled ES |  | 0.433 | 0.107                | 1.748  |
| -----+-----   |  |       |                      |        |
| D - A         |  |       |                      |        |
| 2             |  | 7.500 | 0.791                | 71.086 |
| 20            |  | 0.343 | 0.037                | 3.136  |
| Sub-total     |  |       |                      |        |
| D+L pooled ES |  | 1.593 | 0.077                | 32.756 |
| -----+-----   |  |       |                      |        |
| H - A         |  |       |                      |        |
| 3             |  | 1.204 | 0.570                | 2.543  |
| 6             |  | 1.000 | 0.017                | 58.434 |
| 19            |  | 1.000 | 0.156                | 6.420  |
| 21            |  | 0.263 | 0.012                | 5.650  |
| Sub-total     |  |       |                      |        |
| D+L pooled ES |  | 1.088 | 0.558                | 2.121  |
| -----+-----   |  |       |                      |        |
| H - F         |  |       |                      |        |
| 4             |  | 1.376 | 0.451                | 4.196  |
| Sub-total     |  |       |                      |        |
| D+L pooled ES |  | 1.376 | 0.451                | 4.196  |
| -----+-----   |  |       |                      |        |
| F - D         |  |       |                      |        |
| 5             |  | 1.021 | 0.230                | 4.526  |
| Sub-total     |  |       |                      |        |
| D+L pooled ES |  | 1.021 | 0.230                | 4.526  |
| -----+-----   |  |       |                      |        |
| H - B         |  |       |                      |        |
| 7             |  | 1.000 | 0.019                | 52.849 |
| 8             |  | 1.000 | 0.018                | 54.465 |
| Sub-total     |  |       |                      |        |



|               |  |       |       |        |
|---------------|--|-------|-------|--------|
| D+L pooled ES |  | 1.000 | 0.060 | 16.710 |
| -----+        |  |       |       |        |
| D - B         |  |       |       |        |
| 9             |  | 0.424 | 0.039 | 4.662  |
| 10            |  | 1.198 | 0.610 | 2.352  |
| 11            |  | 0.176 | 0.008 | 3.969  |
| 14            |  | 0.786 | 0.298 | 2.071  |
| Sub-total     |  |       |       |        |
| D+L pooled ES |  | 0.948 | 0.557 | 1.614  |
| -----+        |  |       |       |        |
| G - B         |  |       |       |        |
| 9             |  | 1.182 | 0.066 | 21.175 |
| 10            |  | 1.341 | 0.685 | 2.625  |
| Sub-total     |  |       |       |        |
| D+L pooled ES |  | 1.332 | 0.692 | 2.563  |
| -----+        |  |       |       |        |
| G - D         |  |       |       |        |
| 9             |  | 2.786 | 0.256 | 30.273 |
| 10            |  | 1.119 | 0.654 | 1.915  |
| Sub-total     |  |       |       |        |
| D+L pooled ES |  | 1.169 | 0.693 | 1.975  |
| -----+        |  |       |       |        |
| F - E         |  |       |       |        |
| 15            |  | 2.667 | 0.361 | 19.712 |
| 16            |  | 1.000 | 0.264 | 3.792  |
| Sub-total     |  |       |       |        |
| D+L pooled ES |  | 1.352 | 0.446 | 4.099  |
| -----+        |  |       |       |        |
| C - B         |  |       |       |        |
| 22            |  | 0.590 | 0.368 | 0.944  |
| Sub-total     |  |       |       |        |
| D+L pooled ES |  | 0.590 | 0.368 | 0.944  |
| -----+        |  |       |       |        |

**Test(s) of heterogeneity**

|       | Heterogeneity<br>statistic | degrees of<br>freedom | P     | I-squared** | Tau-squared |
|-------|----------------------------|-----------------------|-------|-------------|-------------|
| E - A | 4.68                       | 2                     | 0.096 | 57.3%       | 0.8098      |
| D - A | 3.67                       | 1                     | 0.055 | 72.8%       | 3.4636      |
| H - A | 0.90                       | 3                     | 0.825 | 0.0%        | 0.0000      |
| H - F | 0.00                       | 0                     | .     | 0.0%        | 0.0000      |
| F - D | 0.00                       | 0                     | .     | 0.0%        | 0.0000      |
| H - B | 0.00                       | 1                     | 1.000 | 0.0%        | 0.0000      |
| D - B | 2.16                       | 3                     | 0.539 | 0.0%        | 0.0000      |
| G - B | 0.01                       | 1                     | 0.933 | 0.0%        | 0.0000      |
| G - D | 0.53                       | 1                     | 0.465 | 0.0%        | 0.0000      |
| F - E | 0.64                       | 1                     | 0.424 | 0.0%        | 0.0000      |
| C - B | 0.00                       | 0                     | .     | 0.0%        | 0.0000      |

\*\* I-squared: the variation in ES attributable to heterogeneity)

**Evaluation of heterogeneity and incoherence**

Overall heterogeneity in the inconsistency model  
 Estimated between-studies SD: 0.501

Overall heterogeneity in the consistency model  
 Estimated between-studies SD: 0.134

Overall incoherence  
 Design-by-treatment test: P=0.95

**Pairwise meta-analysis with fixed-effects**

| Study  |  | ES | [95% Conf. Interval] |
|--------|--|----|----------------------|
| -----+ |  |    |                      |
| E - A  |  |    |                      |

|               |  |       |       |        |
|---------------|--|-------|-------|--------|
| 0             |  | 1.069 | 0.020 | 57.483 |
| 1             |  | 0.835 | 0.363 | 1.921  |
| 18            |  | 0.143 | 0.036 | 0.573  |
| Sub-total     |  |       |       |        |
| I-V pooled ES |  | 0.535 | 0.265 | 1.080  |
| -----+        |  |       |       |        |
| D - A         |  |       |       |        |
| 2             |  | 7.500 | 0.791 | 71.086 |
| 20            |  | 0.343 | 0.037 | 3.136  |
| Sub-total     |  |       |       |        |
| I-V pooled ES |  | 1.565 | 0.323 | 7.578  |
| -----+        |  |       |       |        |
| H - A         |  |       |       |        |
| 3             |  | 1.204 | 0.570 | 2.543  |
| 6             |  | 1.000 | 0.017 | 58.434 |
| 19            |  | 1.000 | 0.156 | 6.420  |
| 21            |  | 0.263 | 0.012 | 5.650  |
| Sub-total     |  |       |       |        |
| I-V pooled ES |  | 1.088 | 0.558 | 2.121  |
| -----+        |  |       |       |        |
| H - F         |  |       |       |        |
| 4             |  | 1.376 | 0.451 | 4.196  |
| Sub-total     |  |       |       |        |
| I-V pooled ES |  | 1.376 | 0.451 | 4.196  |
| -----+        |  |       |       |        |
| F - D         |  |       |       |        |
| 5             |  | 1.021 | 0.230 | 4.526  |
| Sub-total     |  |       |       |        |
| I-V pooled ES |  | 1.021 | 0.230 | 4.526  |
| -----+        |  |       |       |        |
| H - B         |  |       |       |        |
| 7             |  | 1.000 | 0.019 | 52.849 |
| 8             |  | 1.000 | 0.018 | 54.465 |
| Sub-total     |  |       |       |        |
| I-V pooled ES |  | 1.000 | 0.060 | 16.710 |
| -----+        |  |       |       |        |
| D - B         |  |       |       |        |
| 9             |  | 0.424 | 0.039 | 4.662  |
| 10            |  | 1.198 | 0.610 | 2.352  |
| 11            |  | 0.176 | 0.008 | 3.969  |
| 14            |  | 0.786 | 0.298 | 2.071  |
| Sub-total     |  |       |       |        |
| I-V pooled ES |  | 0.948 | 0.557 | 1.614  |
| -----+        |  |       |       |        |
| G - B         |  |       |       |        |
| 9             |  | 1.182 | 0.066 | 21.175 |
| 10            |  | 1.341 | 0.685 | 2.625  |
| Sub-total     |  |       |       |        |
| I-V pooled ES |  | 1.332 | 0.692 | 2.563  |
| -----+        |  |       |       |        |
| G - D         |  |       |       |        |
| 9             |  | 2.786 | 0.256 | 30.273 |
| 10            |  | 1.119 | 0.654 | 1.915  |
| Sub-total     |  |       |       |        |
| I-V pooled ES |  | 1.169 | 0.693 | 1.975  |
| -----+        |  |       |       |        |
| F - E         |  |       |       |        |
| 15            |  | 2.667 | 0.361 | 19.712 |
| 16            |  | 1.000 | 0.264 | 3.792  |
| Sub-total     |  |       |       |        |
| I-V pooled ES |  | 1.352 | 0.446 | 4.099  |
| -----+        |  |       |       |        |
| C - B         |  |       |       |        |
| 22            |  | 0.590 | 0.368 | 0.944  |
| Sub-total     |  |       |       |        |
| I-V pooled ES |  | 0.590 | 0.368 | 0.944  |
| -----+        |  |       |       |        |

Loop-specific heterogeneity

\* 1 triangular loops found  
 \* 5 quadratic loops found

Note: Heterogeneity of loop TAU-NET-SC cannot be estimated due to insufficient observations - set equal to 0

Evaluation of inconsistency using loop-specific heterogeneity estimates:

| Loop            | IF    | seIF  | z_value | p_value | CI_95       | Loop_Heterog_tau2 |
|-----------------|-------|-------|---------|---------|-------------|-------------------|
| WL-NET-EMDR-SSM | 0.912 | 1.994 | 0.457   | 0.647   | (0.00,4.82) | 0.923             |
| WL-NET-SSM-CBT  | 0.768 | 1.476 | 0.521   | 0.603   | (0.00,3.66) | 0.153             |
| TAU-NET-SC      | 0.503 | 0.637 | 0.790   | 0.429   | (0.00,1.75) | 0.000             |
| WL-TAU-NET-CBT  | 0.416 | 1.703 | 0.244   | 0.807   | (0.00,3.75) | 0.000             |
| TAU-NET-SSM-CBT | 0.287 | 1.743 | 0.165   | 0.869   | (0.00,3.70) | 0.000             |
| WL-EMDR-SSM-CBT | 0.097 | 0.985 | 0.098   | 0.922   | (0.00,2.03) | 0.030             |

Consistency between direct and indirect estimates

| Side  | Direct<br>Coef. | Std. Err. | Indirect<br>Coef. | Std. Err. | Difference<br>Coef. | Std. Err. | P> z  | tau      |
|-------|-----------------|-----------|-------------------|-----------|---------------------|-----------|-------|----------|
| A D   | -.4485984       | .8205838  | .2564328          | .8301627  | -.7050311           | 1.16775   | 0.546 | .2257647 |
| A E   | .6913416        | .4440306  | .3760236          | .8715872  | .315318             | .9676707  | 0.745 | .2753051 |
| A H   | -.0495188       | .4154468  | -.2003068         | .8181055  | .1507881            | .9178862  | 0.870 | .2775706 |
| B C * | .5283392        | .2747806  | .8629567          | 199.5437  | -.3346175           | 199.5436  | 0.999 | .1334322 |
| B D * | .0845849        | .3452598  | -.0231472         | 1.58598   | .1077321            | 1.631784  | 0.947 | .1827816 |
| B G * | -.2669197       | .3932646  | .588422           | 1.163372  | -.8553417           | 1.257773  | 0.496 | .2216374 |
| B H   | -.0000295       | 1.442485  | .1075721          | .763775   | -.1076016           | 1.632235  | 0.947 | .1827694 |
| D F   | -.0206196       | .7877958  | .6318127          | .8594658  | -.6524323           | 1.165895  | 0.576 | .2079654 |
| D G * | -.1935466       | .3641439  | -1.048854         | 1.205038  | .8553076            | 1.257769  | 0.496 | .2216337 |
| E F   | -.3188552       | .6047516  | -.6341482         | .7652966  | .315293             | .9677199  | 0.745 | .2753102 |
| F H   | -.3194275       | .6333367  | -.2087627         | .7072879  | -.1106648           | .9494077  | 0.907 | .2787423 |

\* Warning: all the evidence about these contrasts comes from the trials which directly compare them.

SUCRA and cumulative probability plots

| Treatm~t | SUCRA | PrBest | MeanRank |
|----------|-------|--------|----------|
| WL       | 54.6  | 9.7    | 4.2      |
| TAU      | 65.0  | 14.5   | 3.4      |
| SH+      | 23.4  | 0.3    | 6.4      |
| NET      | 59.8  | 5.5    | 3.8      |
| EMDR     | 14.0  | 0.5    | 7.0      |
| SSM      | 41.3  | 6.2    | 5.1      |
| SC       | 78.9  | 41.1   | 2.5      |
| CBT      | 63.0  | 22.2   | 3.6      |

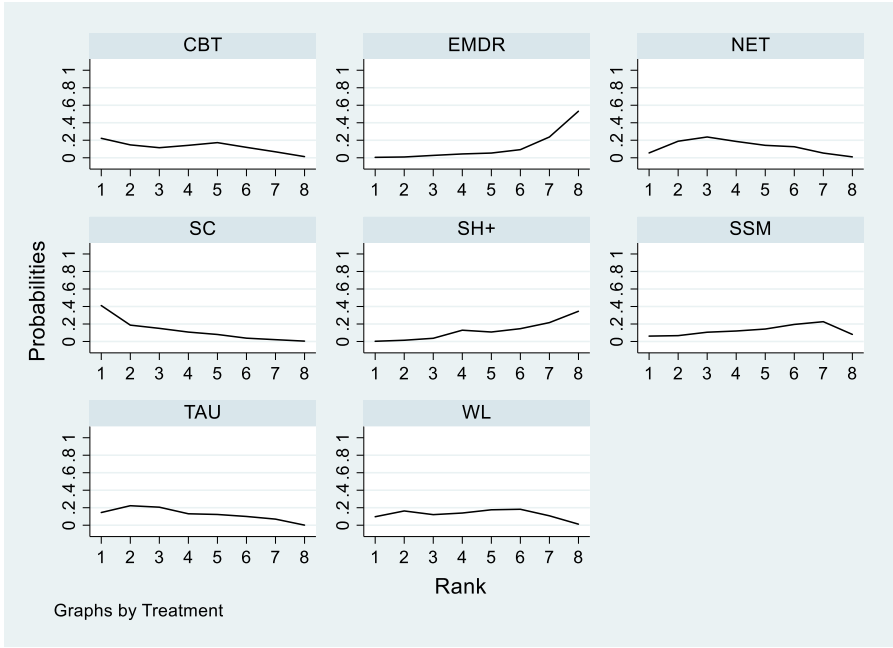

Sensitivity analysis: excluding trials with a high risk of bias

Intervention codes:

|                                 |   |
|---------------------------------|---|
| Waiting List                    | 1 |
| Treatment as Usual              | 2 |
| Self-Help Plus                  | 3 |
| Narrative Exposure Therapy      | 4 |
| EMDR                            | 5 |
| Stabilization/Stress Management | 6 |
| Supportive Counseling           | 7 |
| Cognitive- Behavioural Therapy  | 8 |

Studies contributing to the analysis n= 12

Network map

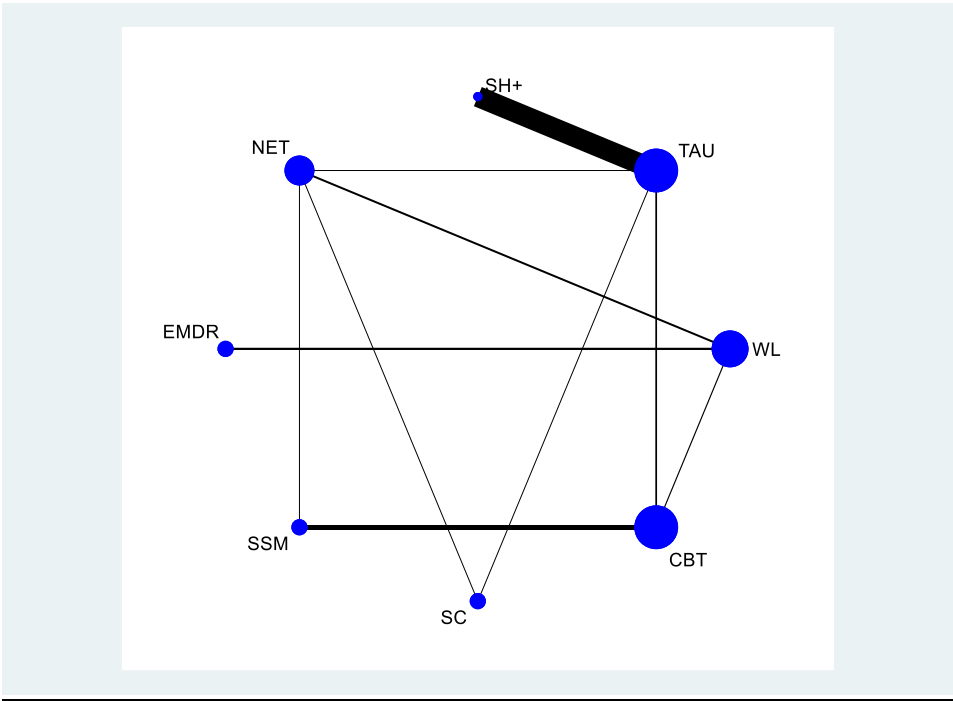

Net league table

|                     |                     |                    |                    |                    |                    |                    |                   |
|---------------------|---------------------|--------------------|--------------------|--------------------|--------------------|--------------------|-------------------|
| <b>CBT</b>          | 0.35 (-1.32,2.03)   | 1.09 (-0.62,2.81)  | 1.29 (-1.11,3.70)  | 0.67 (-0.93,2.26)  | 1.00 (-1.61,3.60)  | 1.56 (0.25,2.87)   | 1.71 (0.27,3.15)  |
| -0.35 (-2.03,1.32)  | <b>EMDR</b>         | 0.74 (-1.08,2.56)  | 0.94 (-1.71,3.59)  | 0.31 (-1.12,1.74)  | 0.64 (-2.35,3.64)  | 1.21 (-0.76,3.18)  | 1.36 (0.14,2.57)  |
| -1.09 (-2.81,0.62)  | -0.74 (-2.56,1.08)  | <b>NET</b>         | 0.20 (-2.03,2.43)  | -0.43 (-2.12,1.27) | -0.10 (-2.96,2.76) | 0.47 (-1.29,2.22)  | 0.62 (-1.01,2.25) |
| -1.29 (-3.70,1.11)  | -0.94 (-3.59,1.71)  | -0.20 (-2.43,2.03) | <b>SC</b>          | -0.63 (-3.21,1.96) | -0.30 (-3.47,2.88) | 0.27 (-1.97,2.51)  | 0.42 (-2.11,2.94) |
| -0.67 (-2.26,0.93)  | -0.31 (-1.74,1.12)  | 0.43 (-1.27,2.12)  | 0.63 (-1.96,3.21)  | <b>SSM</b>         | 0.33 (-2.61,3.27)  | 0.89 (-1.00,2.78)  | 1.04 (-0.50,2.59) |
| -1.00 (-3.60,1.61)  | -0.64 (-3.64,2.35)  | 0.10 (-2.76,2.96)  | 0.30 (-2.88,3.47)  | -0.33 (-3.27,2.61) | <b>SHplus</b>      | 0.56 (-1.69,2.82)  | 0.71 (-2.16,3.59) |
| -1.56 (-2.87,-0.25) | -1.21 (-3.18,0.76)  | -0.47 (-2.22,1.29) | -0.27 (-2.51,1.97) | -0.89 (-2.78,1.00) | -0.56 (-2.82,1.69) | <b>TAU</b>         | 0.15 (-1.63,1.93) |
| -1.71 (-3.15,-0.27) | -1.36 (-2.57,-0.14) | -0.62 (-2.25,1.01) | -0.42 (-2.94,2.11) | -1.04 (-2.59,0.50) | -0.71 (-3.59,2.16) | -0.15 (-1.93,1.63) | <b>WL</b>         |

**Interval plot**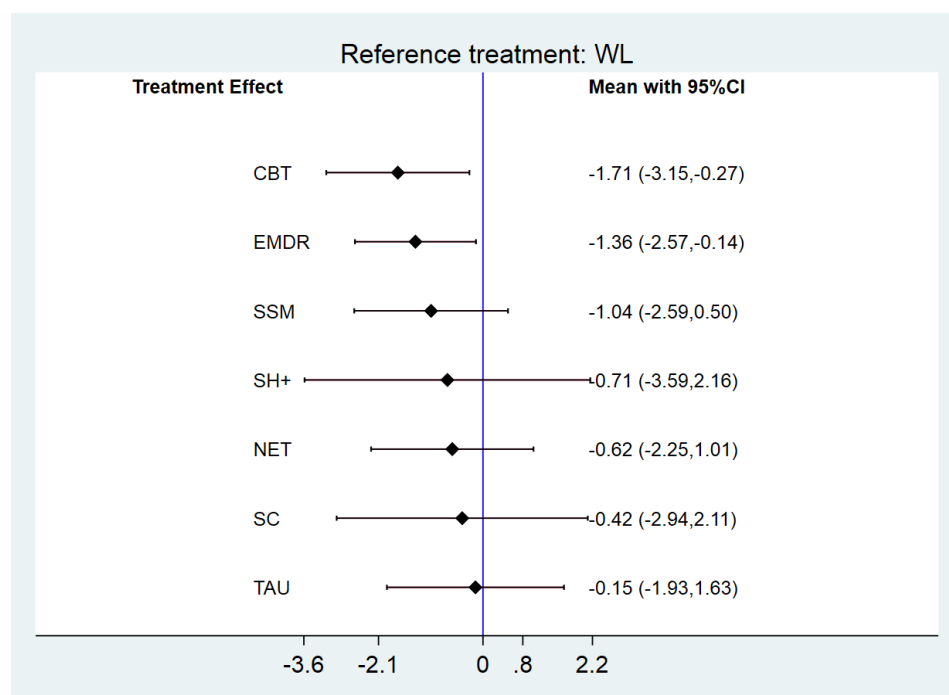**Pairwise meta-analysis**

| Study         | ES     | [95% Conf. Interval] |        |
|---------------|--------|----------------------|--------|
| -----         |        |                      |        |
| 5 - 1         |        |                      |        |
| 0             | -1.651 | -2.510               | -0.792 |
| 1             | -1.810 | -2.283               | -1.337 |
| 18            | -0.616 | -1.219               | -0.014 |
| Sub-total     |        |                      |        |
| D+L pooled ES | -1.355 | -2.154               | -0.556 |
| -----         |        |                      |        |
| 8 - 1         |        |                      |        |
| 3             | 0.162  | -0.231               | 0.555  |
| 21            | -4.915 | -6.482               | -3.348 |
| Sub-total     |        |                      |        |
| D+L pooled ES | -2.317 | -7.291               | 2.656  |
| -----         |        |                      |        |
| 8 - 6         |        |                      |        |
| 4             | -0.067 | -0.416               | 0.283  |
| Sub-total     |        |                      |        |
| D+L pooled ES | -0.067 | -0.416               | 0.283  |
| -----         |        |                      |        |
| 6 - 4         |        |                      |        |
| 5             | 0.244  | -0.616               | 1.105  |
| Sub-total     |        |                      |        |
| D+L pooled ES | 0.244  | -0.616               | 1.105  |
| -----         |        |                      |        |
| 8 - 2         |        |                      |        |
| 7             | -2.121 | -2.915               | -1.328 |
| 8             | -1.904 | -2.905               | -0.903 |
| 12            | -0.825 | -2.161               | 0.511  |
| Sub-total     |        |                      |        |
| D+L pooled ES | -1.775 | -2.450               | -1.100 |
| -----         |        |                      |        |
| 4 - 2         |        |                      |        |
| 9             | -0.190 | -0.951               | 0.570  |
| Sub-total     |        |                      |        |
| D+L pooled ES | -0.190 | -0.951               | 0.570  |
| -----         |        |                      |        |
| 7 - 2         |        |                      |        |

|       |               |  |        |        |        |
|-------|---------------|--|--------|--------|--------|
| 9     |               |  | -0.127 | -0.912 | 0.658  |
|       | Sub-total     |  |        |        |        |
|       | D+L pooled ES |  | -0.127 | -0.912 | 0.658  |
| ----- |               |  |        |        |        |
|       | 7 - 4         |  |        |        |        |
| 9     |               |  | 0.063  | -0.679 | 0.806  |
|       | Sub-total     |  |        |        |        |
|       | D+L pooled ES |  | 0.063  | -0.679 | 0.806  |
| ----- |               |  |        |        |        |
|       | 6 - 5         |  |        |        |        |
| 15    |               |  | 0.641  | -0.657 | 1.940  |
| 16    |               |  | 0.058  | -0.444 | 0.561  |
|       | Sub-total     |  |        |        |        |
|       | D+L pooled ES |  | 0.134  | -0.334 | 0.603  |
| ----- |               |  |        |        |        |
|       | 4 - 1         |  |        |        |        |
| 20    |               |  | -0.262 | -0.782 | 0.259  |
|       | Sub-total     |  |        |        |        |
|       | D+L pooled ES |  | -0.262 | -0.782 | 0.259  |
| ----- |               |  |        |        |        |
|       | 3 - 2         |  |        |        |        |
| 22    |               |  | -0.563 | -0.725 | -0.401 |
|       | Sub-total     |  |        |        |        |
|       | D+L pooled ES |  | -0.563 | -0.725 | -0.401 |
| ----- |               |  |        |        |        |

**Test(s) of heterogeneity:**

| Heterogeneity | degrees of<br>statistic | freedom | P     | I-squared** | Tau-squared |
|---------------|-------------------------|---------|-------|-------------|-------------|
| 5 - 1         | 9.72                    | 2       | 0.008 | 79.4%       | 0.3900      |
| 8 - 1         | 37.93                   | 1       | 0.000 | 97.4%       | 12.5470     |
| 8 - 6         | 0.00                    | 0       | .     | .%          | 0.0000      |
| 6 - 4         | 0.00                    | 0       | .     | .%          | 0.0000      |
| 8 - 2         | 2.71                    | 2       | 0.257 | 26.3%       | 0.0963      |
| 4 - 2         | 0.00                    | 0       | .     | .%          | 0.0000      |
| 7 - 2         | 0.00                    | 0       | .     | .%          | 0.0000      |
| 7 - 4         | 0.00                    | 0       | .     | .%          | 0.0000      |
| 6 - 5         | 0.67                    | 1       | 0.412 | 0.0%        | 0.0000      |
| 4 - 1         | 0.00                    | 0       | .     | .%          | 0.0000      |
| 3 - 2         | 0.00                    | 0       | .     | .%          | 0.0000      |

\*\* I-squared: the variation in ES attributable to heterogeneity)

**Evaluation of heterogeneity and incoherence**

Overall heterogeneity in the inconsistency model  
Estimated between-studies SD: 1.434

Overall heterogeneity in the consistency model  
Estimated between-studies SD: 1.147

Overall incoherence  
Design-by-treatment test: P=0.904

Loop-specific heterogeneity

- \* 1 triangular loops found
- \* 3 quadratic loops found

Note: Heterogeneity of loop TAU-NET-SC cannot be estimated due to insufficient observations - set equal to 0

Note: Heterogeneity of loop WL-NET-SSM-CBT cannot be estimated due to insufficient observations - set equal to 0

Evaluation of inconsistency using loop-specific heterogeneity estimates:

| Loop            | IF    | seIF  | z_value | p_value | CI_95       | Loop_Heterog_tau2 |
|-----------------|-------|-------|---------|---------|-------------|-------------------|
| TAU-NET-SSM-CBT | 1.762 | 0.910 | 1.936   | 0.053   | (0.00,3.55) | 0.096             |
| WL-NET-EMDR-SSM | 1.084 | 1.130 | 0.960   | 0.337   | (0.00,3.30) | 0.311             |
| WL-EMDR-SSM-CBT | 0.893 | 2.716 | 0.329   | 0.742   | (0.00,6.22) | 1.660             |
| WL-TAU-NET-CBT  | 0.479 | 3.537 | 0.136   | 0.892   | (0.00,7.41) | 3.636             |
| WL-NET-SSM-CBT  | 0.054 | 0.577 | 0.094   | 0.925   | (0.00,1.18) | 0.000             |
| TAU-NET-SC      | .     | .     | .       | .       |             | 0.000             |

\*\*\* Note: Loop TAU-NET-SC is formed only by multi-arm trial(s) - Consistent by definition

#### Consistency between direct and indirect estimates

| Side  | Direct    |           | Indirect  |           | Difference |           | P> z  | tau      |
|-------|-----------|-----------|-----------|-----------|------------|-----------|-------|----------|
|       | Coef.     | Std. Err. | Coef.     | Std. Err. | Coef.      | Std. Err. |       |          |
| 1 4   | -.2615775 | 1.265335  | -.9977589 | 1.255494  | .7361814   | 1.782509  | 0.680 | 1.237194 |
| 1 5   | -1.357102 | .7444421  | -1.394759 | 1.527617  | .0376574   | 1.699282  | 0.982 | 1.244818 |
| 1 8   | -1.974502 | .9805079  | -1.331967 | 1.307085  | -.6425353  | 1.634065  | 0.694 | 1.246009 |
| 2 3 * | -.562943  | 1.149775  | -.2595793 | 200.0651  | -.3033637  | 200.0684  | 0.999 | 1.146803 |
| 2 4 * | -.1903732 | 1.285376  | -.7639694 | 1.417129  | .5735962   | 1.91323   | 0.764 | 1.225424 |
| 2 7 * | -.126919  | 1.289238  | -1.273912 | 3.600643  | 1.146993   | 3.826286  | 0.764 | 1.225416 |
| 2 8   | -1.654578 | .7725492  | -1.081298 | 1.748636  | -.5732792  | 1.912991  | 0.764 | 1.225392 |
| 4 6   | .2443465  | 1.264888  | -1.077033 | 1.250609  | 1.32138    | 1.778754  | 0.458 | 1.186253 |
| 4 7 * | .0634569  | 1.282688  | 1.210654  | 3.607599  | -1.147197  | 3.826243  | 0.764 | 1.225414 |
| 5 6   | .3196129  | .9442344  | .2815427  | 1.411883  | .0380702   | 1.699545  | 0.982 | 1.244849 |
| 6 8   | -.0667696 | 1.229715  | -1.263717 | 1.197039  | 1.196947   | 1.71613   | 0.486 | 1.216728 |

\* Warning: all the evidence about these contrasts comes from the trials which directly compare them.

#### SUCRA and cumulative probability plots

| Treatm~t | SUCRA | PrBest | MeanRank |
|----------|-------|--------|----------|
| WL       | 21.1  | 0.0    | 6.5      |
| TAU      | 26.9  | 0.1    | 6.1      |
| SH+      | 49.3  | 16.9   | 4.5      |
| NET      | 45.3  | 3.1    | 4.8      |
| EMDR     | 72.7  | 22.1   | 2.9      |
| SSM      | 60.7  | 8.7    | 3.8      |
| SC       | 39.1  | 7.9    | 5.3      |
| CBT      | 84.8  | 41.2   | 2.1      |



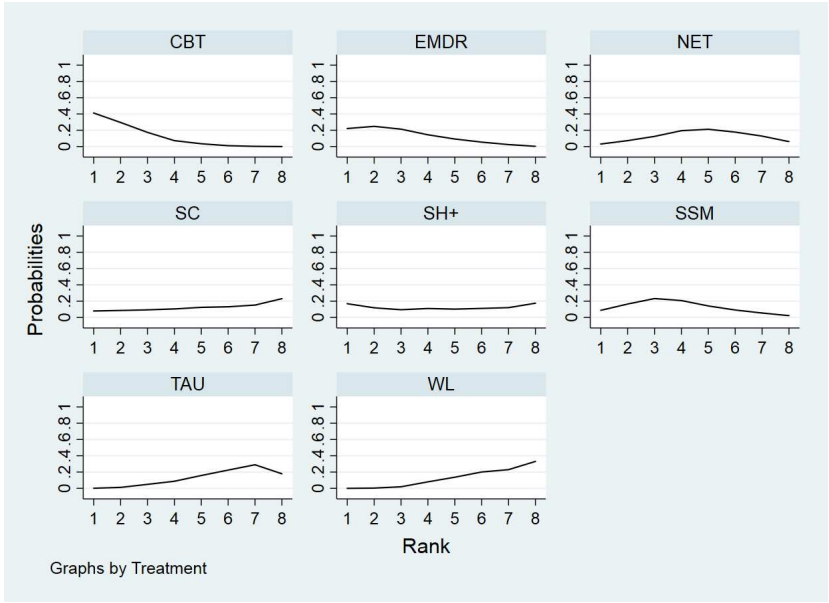

## Sensitivity analysis: excluding studies with PTSD probable diagnosis

### Intervention codes:

|                                 |   |
|---------------------------------|---|
| Waiting List                    | 1 |
| Treatment as Usual              | 2 |
| Narrative Exposure Therapy      | 3 |
| EMDR                            | 4 |
| Stabilization/Stress Management | 5 |
| Supportive Counseling           | 6 |
| Cognitive- Behavioural Therapy  | 7 |

### Studies contributing to the analysis n= 14

#### Network map

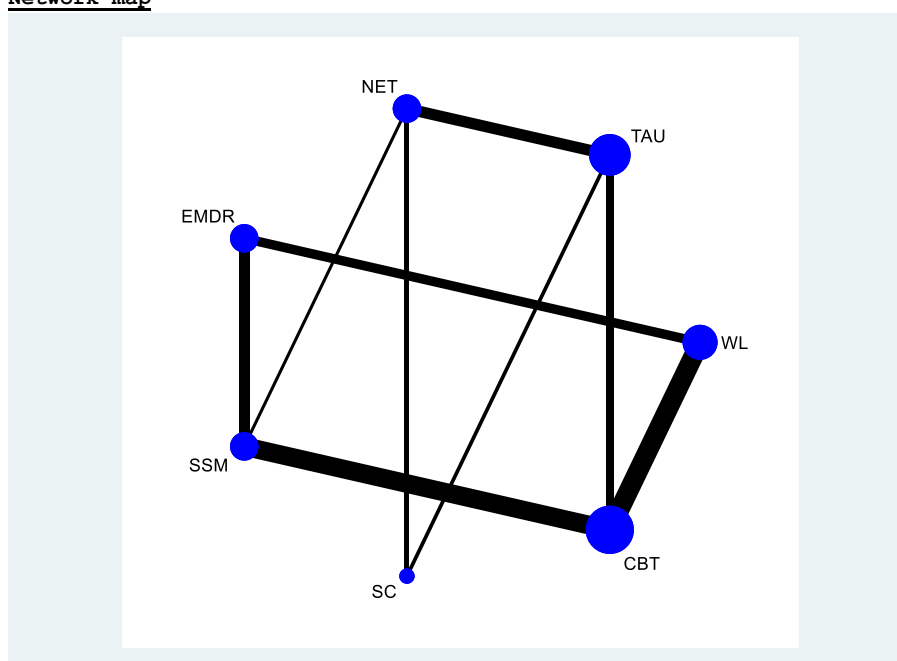

#### Net league table

| CBT                        | -0.30 (-1.27,0.67)         | 0.72 (-0.32,1.77)  | 1.04 (-0.44,2.51)  | 0.22 (-0.66,1.10)   | 1.43 (0.61,2.25)  | 0.55 (-0.23,1.33)  |
|----------------------------|----------------------------|--------------------|--------------------|---------------------|-------------------|--------------------|
| 0.30 (-0.67,1.27)          | EMDR                       | 1.02 (-0.25,2.29)  | 1.34 (-0.33,3.01)  | 0.52 (-0.35,1.40)   | 1.73 (0.55,2.92)  | 0.85 (-0.00,1.70)  |
| -0.72 (-1.77,0.32)         | -1.02 (-2.29,0.25)         | NET                | 0.31 (-0.96,1.59)  | -0.50 (-1.59,0.59)  | 0.71 (-0.14,1.56) | -0.18 (-1.41,1.06) |
| -1.04 (-2.51,0.44)         | -1.34 (-3.01,0.33)         | -0.31 (-1.59,0.96) | SC                 | -0.81 (-2.37,0.75)  | 0.40 (-0.89,1.68) | -0.49 (-2.12,1.13) |
| -0.22 (-1.10,0.66)         | -0.52 (-1.40,0.35)         | 0.50 (-0.59,1.59)  | 0.81 (-0.75,2.37)  | SSM                 | 1.21 (0.15,2.27)  | 0.32 (-0.65,1.30)  |
| <b>-1.43 (-2.25,-0.61)</b> | <b>-1.73 (-2.92,-0.55)</b> | -0.71 (-1.56,0.14) | -0.40 (-1.68,0.89) | -1.21 (-2.27,-0.15) | TAU               | -0.89 (-1.98,0.21) |
| -0.55 (-1.33,0.23)         | -0.85 (-1.70,0.00)         | 0.18 (-1.06,1.41)  | 0.49 (-1.13,2.12)  | -0.32 (-1.30,0.65)  | 0.89 (-0.21,1.98) | WL                 |

**Interval plot**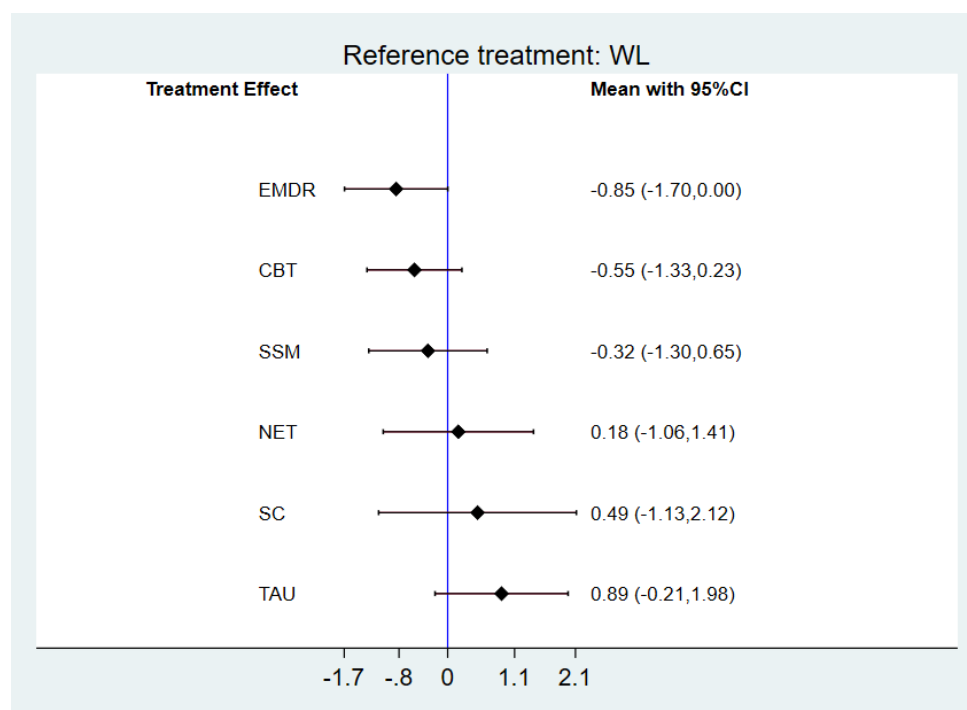**Pairwise meta-analysis**

| Study         | ES     | [95% Conf. Interval] |        |
|---------------|--------|----------------------|--------|
| -----         |        |                      |        |
| 4 - 1         |        |                      |        |
| 0             | -1.651 | -2.510               | -0.792 |
| 18            | -0.616 | -1.219               | -0.014 |
| Sub-total     |        |                      |        |
| D+L pooled ES | -1.087 | -2.096               | -0.077 |
| -----         |        |                      |        |
| 7 - 1         |        |                      |        |
| 3             | 0.162  | -0.231               | 0.555  |
| 6             | -2.213 | -3.768               | -0.658 |
| 19            | -0.111 | -0.871               | 0.649  |
| Sub-total     |        |                      |        |
| D+L pooled ES | -0.428 | -1.377               | 0.520  |
| -----         |        |                      |        |
| 7 - 5         |        |                      |        |
| 4             | -0.067 | -0.416               | 0.283  |
| Sub-total     |        |                      |        |
| D+L pooled ES | -0.067 | -0.416               | 0.283  |
| -----         |        |                      |        |
| 5 - 3         |        |                      |        |
| 5             | 0.244  | -0.616               | 1.105  |
| Sub-total     |        |                      |        |
| D+L pooled ES | 0.244  | -0.616               | 1.105  |
| -----         |        |                      |        |
| 7 - 2         |        |                      |        |
| 7             | -2.121 | -2.915               | -1.328 |
| 8             | -1.904 | -2.905               | -0.903 |
| 12            | -0.825 | -2.161               | 0.511  |
| Sub-total     |        |                      |        |
| D+L pooled ES | -1.775 | -2.450               | -1.100 |
| -----         |        |                      |        |
| 3 - 2         |        |                      |        |
| 9             | -0.190 | -0.951               | 0.570  |

|               |  |        |        |        |
|---------------|--|--------|--------|--------|
| 14            |  | -0.566 | -1.124 | -0.007 |
| Sub-total     |  |        |        |        |
| D+L pooled ES |  | -0.434 | -0.884 | 0.016  |
| -----+        |  |        |        |        |
| 6 - 2         |  |        |        |        |
| 9             |  | -0.127 | -0.912 | 0.658  |
| Sub-total     |  |        |        |        |
| D+L pooled ES |  | -0.127 | -0.912 | 0.658  |
| -----+        |  |        |        |        |
| 6 - 3         |  |        |        |        |
| 9             |  | 0.063  | -0.679 | 0.806  |
| Sub-total     |  |        |        |        |
| D+L pooled ES |  | 0.063  | -0.679 | 0.806  |
| -----+        |  |        |        |        |
| 5 - 4         |  |        |        |        |
| 15            |  | 0.641  | -0.657 | 1.940  |
| 16            |  | 0.058  | -0.444 | 0.561  |
| Sub-total     |  |        |        |        |
| D+L pooled ES |  | 0.134  | -0.334 | 0.603  |
| -----+        |  |        |        |        |

**Test(s) of heterogeneity**

| Heterogeneity | degrees of<br>statistic | freedom | P     | I-squared** | Tau-squared |
|---------------|-------------------------|---------|-------|-------------|-------------|
| 4 - 1         | 3.74                    | 1       | 0.053 | 73.2%       | 0.3922      |
| 7 - 1         | 8.52                    | 2       | 0.014 | 76.5%       | 0.5004      |
| 7 - 5         | 0.00                    | 0       | .     | .%          | 0.0000      |
| 5 - 3         | 0.00                    | 0       | .     | .%          | 0.0000      |
| 7 - 2         | 2.71                    | 2       | 0.257 | 26.3%       | 0.0963      |
| 3 - 2         | 0.61                    | 1       | 0.436 | 0.0%        | 0.0000      |
| 6 - 2         | 0.00                    | 0       | .     | .%          | 0.0000      |
| 6 - 3         | 0.00                    | 0       | .     | .%          | 0.0000      |
| 5 - 4         | 0.67                    | 1       | 0.412 | 0.0%        | 0.0000      |

\*\* I-squared: the variation in ES attributable to heterogeneity)

**Evaluation of heterogeneity and incoherence**Overall heterogeneity in the inconsistency model

Estimated between-studies SD: .586

Overall heterogeneity in the consistency model

Estimated between-studies SD: .596

Overall incoherence

Design-by-treatment test: P=0.44

Loop-specific heterogeneity

\* 1 triangular loops found

\* 2 quadratic loops found

Note: Heterogeneity of loop TAU-NET-CBT cannot be estimated due to insufficient observations - set equal to 0

Evaluation of inconsistency using loop-specific heterogeneity estimates:

| Loop           | IF    | seIF  | z_value | p_value | CI_95       | Loop_Heterog_tau2 |
|----------------|-------|-------|---------|---------|-------------|-------------------|
| TAU-NET-SSM-SC | 1.561 | 0.655 | 2.382   | 0.017   | (0.28,2.85) | 0.020             |
| WL-EMDR-SSM-SC | 0.508 | 1.249 | 0.407   | 0.684   | (0.00,2.96) | 0.372             |
| TAU-NET-CBT    | 0.375 | 0.621 | 0.605   | 0.545   | (0.00,1.59) | 0.000             |

---

### Consistency between direct and indirect estimates

| Side  | Direct    |           | Indirect  |           | Difference |           |       | tau      |
|-------|-----------|-----------|-----------|-----------|------------|-----------|-------|----------|
|       | Coef.     | Std. Err. | Coef.     | Std. Err. | Coef.      | Std. Err. | P> z  |          |
| 1 4   | -1.081049 | .4883794  | -.1367009 | .8494138  | -.9443476  | .9756341  | 0.333 | .5802651 |
| 1 7   | -.3637873 | .4406221  | -1.308138 | .8778413  | .9443504   | .9756171  | 0.333 | .5802608 |
| 2 3 * | -.3977874 | .4038455  | -2.118642 | .8581647  | 1.720855   | .9474524  | 0.069 | .4622194 |
| 2 6 * | -.126914  | .7283897  | -1.792381 | 1.672049  | 1.665467   | 1.827582  | 0.362 | .6083257 |
| 2 7   | -1.741119 | .4035171  | -.0202595 | .8566127  | -1.72086   | .9474449  | 0.069 | .462217  |
| 3 5   | .2443547  | .6374893  | -1.476494 | .7009119  | 1.720849   | .9474546  | 0.069 | .4622204 |
| 3 6 * | .0634569  | .7167352  | 1.728917  | 1.687094  | -1.66546   | 1.827586  | 0.362 | .6083263 |
| 4 5   | .2574946  | .5167759  | 1.201841  | .8247711  | -.9443469  | .9756395  | 0.333 | .5802669 |
| 5 7   | -.0667676 | .6892053  | -.4121527 | .6988904  | .3453851   | .9815557  | 0.725 | .6657566 |

\* Warning: all the evidence about these contrasts comes from the trials which directly compare them.

### SUCRA and cumulative probability plots

| Treatment | SUCRA | PrBest | MeanRank |
|-----------|-------|--------|----------|
| WL        | 44.0  | 0.6    | 4.4      |
| TAU       | 6.8   | 0.0    | 6.6      |
| NET       | 38.7  | 1.8    | 4.7      |
| EMDR      | 91.3  | 66.0   | 1.5      |
| SSM       | 64.1  | 6.0    | 3.2      |
| SC        | 26.5  | 3.5    | 5.4      |
| CBT       | 78.6  | 22.2   | 2.3      |

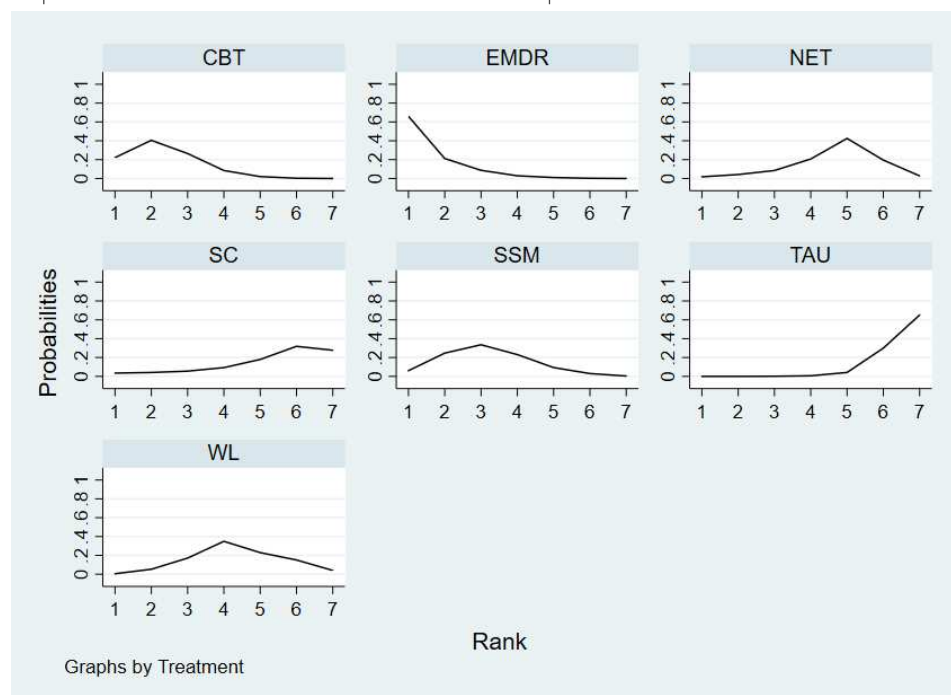

Subgroup analysis: by country income (HICs vs LMICs)

Intervention codes:

|                                 |   |
|---------------------------------|---|
| Waiting List                    | 1 |
| Treatment as Usual              | 2 |
| Self-Help Plus                  | 3 |
| Narrative Exposure Therapy      | 4 |
| EMDR                            | 5 |
| Stabilization/Stress Management | 6 |
| Supportive Counseling           | 7 |
| Cognitive- Behavioural Therapy  | 8 |

Studies contributing to the analysis

- HICs n= 12
- LMICs n= 6

Network map

High income

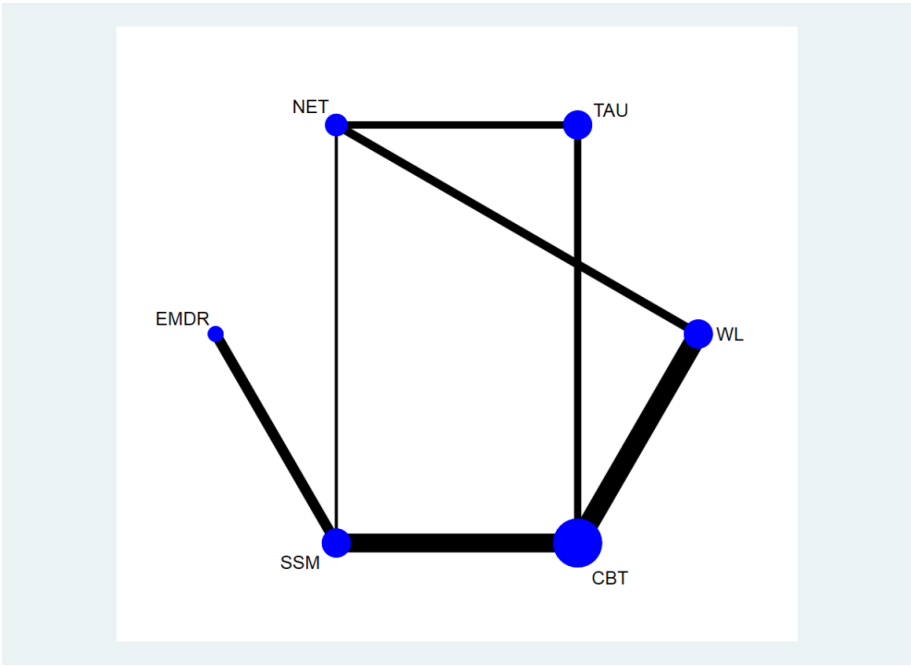

Low and middle income

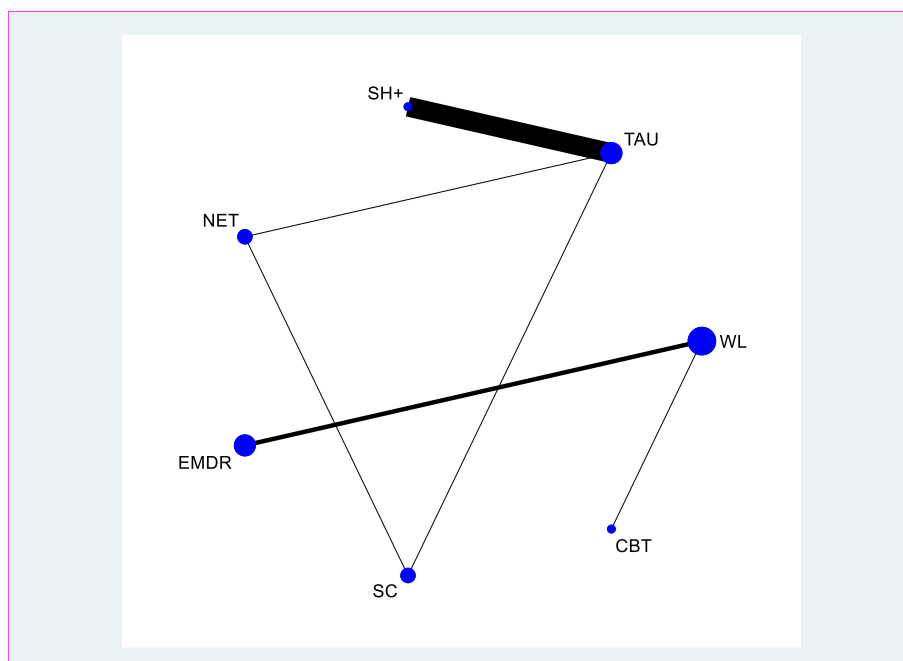**Net league table****High income**

|                            |                    |                            |                            |                   |                     |
|----------------------------|--------------------|----------------------------|----------------------------|-------------------|---------------------|
| <b>CBT</b>                 | 0.05 (-1.32,1.42)  | 0.41 (-0.50,1.31)          | 0.30 (-0.66,1.27)          | 1.47 (0.71,2.24)  | 0.45 (-0.30,1.20)   |
| -0.05 (-1.42,1.32)         | <b>EMDR</b>        | 0.36 (-1.07,1.78)          | 0.25 (-0.73,1.24)          | 1.42 (-0.07,2.92) | 0.40 (-1.10,1.89)   |
| -0.41 (-1.31,0.50)         | -0.36 (-1.78,1.07) | <b>NET</b>                 | -0.10 (-1.14,0.93)         | 1.07 (0.14,1.99)  | 0.04 (-0.88,0.96)   |
| -0.30 (-1.27,0.66)         | -0.25 (-1.24,0.73) | 0.10 (-0.93,1.14)          | <b>SSM</b>                 | 1.17 (0.04,2.30)  | 0.14 (-0.97,1.26)   |
| <b>-1.47 (-2.24,-0.71)</b> | -1.42 (-2.92,0.07) | <b>-1.07 (-1.99,-0.14)</b> | <b>-1.17 (-2.30,-0.04)</b> | <b>TAU</b>        | -1.03 (-2.01,-0.04) |
| -0.45 (-1.20,0.30)         | -0.40 (-1.89,1.10) | -0.04 (-0.96,0.88)         | -0.14 (-1.26,0.97)         | 1.03 (0.04,2.01)  | <b>WL</b>           |

**Low and middle income: Network 1**

|                            |                            |                  |
|----------------------------|----------------------------|------------------|
| <b>CBT</b>                 | 3.56 (1.47,5.65)           | 4.91 (2.97,6.86) |
| <b>-3.56 (-5.65,-1.47)</b> | <b>EMDR</b>                | 1.35 (0.59,2.12) |
| <b>-4.91 (-6.86,-2.97)</b> | <b>-1.35 (-2.12,-0.59)</b> | <b>WL</b>        |

**Low and middle income: Network 2**

|                    |                   |                     |                    |
|--------------------|-------------------|---------------------|--------------------|
| <b>NET</b>         | 0.19 (-0.57,0.95) | -0.37 (-1.15,0.40)  | 0.06 (-0.68,0.81)  |
| -0.19 (-0.95,0.57) | <b>TAU</b>        | -0.56 (-0.72,-0.40) | -0.13 (-0.91,0.66) |
| 0.37 (-0.40,1.15)  | 0.56 (0.40,0.72)  | <b>SHplus</b>       | 0.44 (-0.37,1.24)  |
| -0.06 (-0.81,0.68) | 0.13 (-0.66,0.91) | -0.44 (-1.24,0.37)  | <b>SC</b>          |

Interval plot  
High income

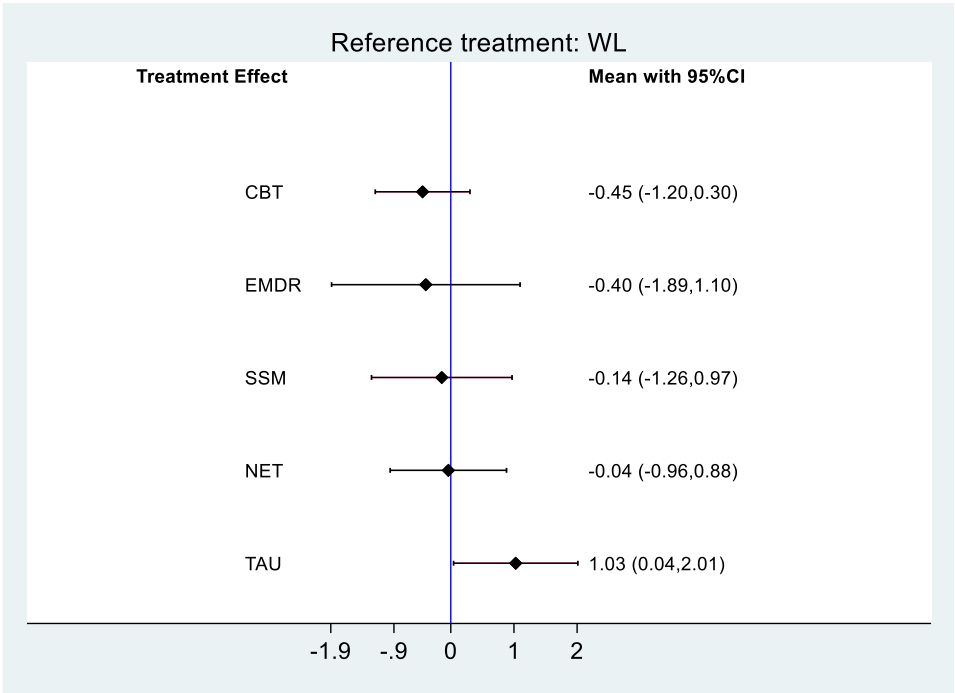

Low income network 1

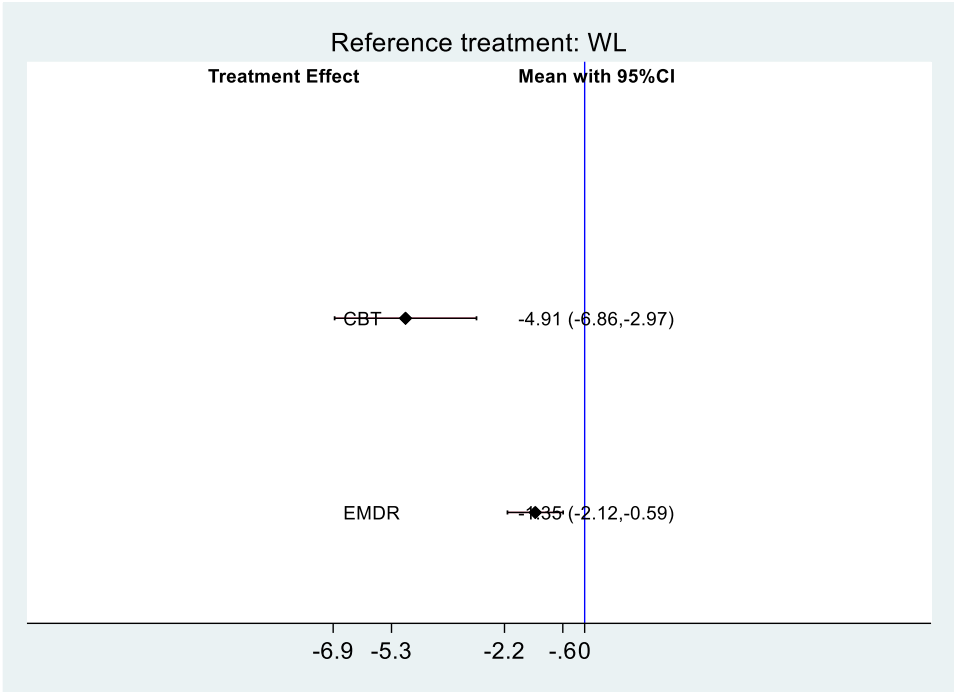

Low income network 2



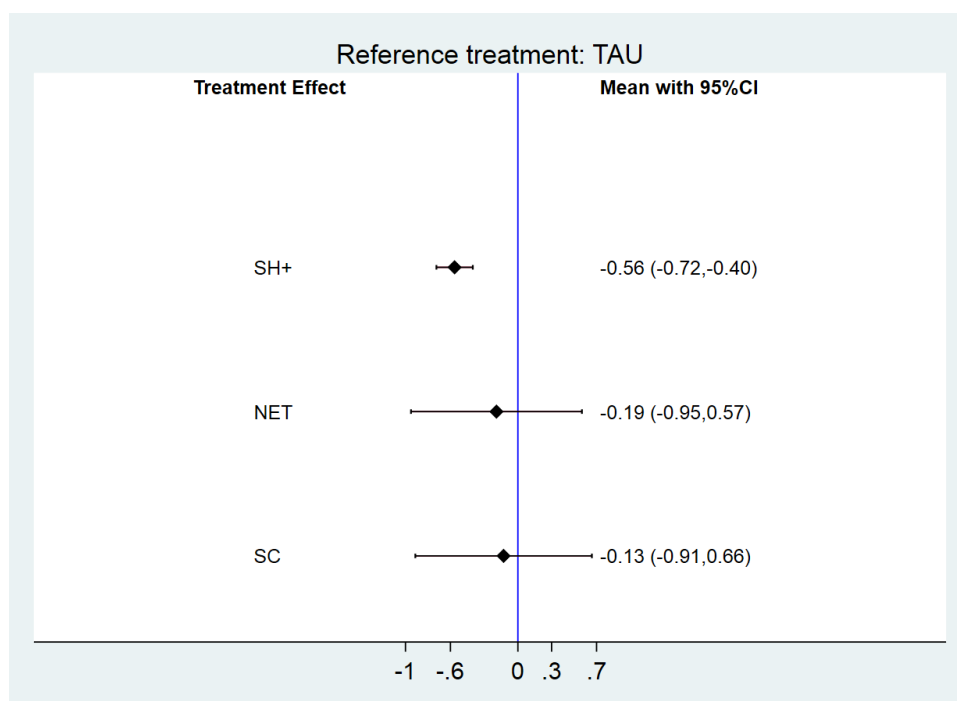

### Pairwise meta-analysis

#### High income

| Study         |  | ES | [95% Conf. Interval] |        |        |
|---------------|--|----|----------------------|--------|--------|
| -----+-----   |  |    |                      |        |        |
| 8 - 1         |  |    |                      |        |        |
| 3             |  |    | 0.162                | -0.231 | 0.555  |
| 6             |  |    | -2.213               | -3.768 | -0.658 |
| 19            |  |    | -0.111               | -0.871 | 0.649  |
| Sub-total     |  |    |                      |        |        |
| D+L pooled ES |  |    | -0.428               | -1.377 | 0.520  |
| -----+-----   |  |    |                      |        |        |
| 8 - 6         |  |    |                      |        |        |
| 4             |  |    | -0.067               | -0.416 | 0.283  |
| Sub-total     |  |    |                      |        |        |
| D+L pooled ES |  |    | -0.067               | -0.416 | 0.283  |
| -----+-----   |  |    |                      |        |        |
| 6 - 4         |  |    |                      |        |        |
| 5             |  |    | 0.244                | -0.616 | 1.105  |
| Sub-total     |  |    |                      |        |        |
| D+L pooled ES |  |    | 0.244                | -0.616 | 1.105  |
| -----+-----   |  |    |                      |        |        |
| 8 - 2         |  |    |                      |        |        |
| 7             |  |    | -2.121               | -2.915 | -1.328 |
| 8             |  |    | -1.904               | -2.905 | -0.903 |
| 12            |  |    | -0.825               | -2.161 | 0.511  |
| Sub-total     |  |    |                      |        |        |
| D+L pooled ES |  |    | -1.775               | -2.450 | -1.100 |
| -----+-----   |  |    |                      |        |        |
| 4 - 2         |  |    |                      |        |        |
| 14            |  |    | -0.566               | -1.124 | -0.007 |
| Sub-total     |  |    |                      |        |        |
| D+L pooled ES |  |    | -0.566               | -1.124 | -0.007 |
| -----+-----   |  |    |                      |        |        |
| 6 - 5         |  |    |                      |        |        |
| 15            |  |    | 0.641                | -0.657 | 1.940  |
| 16            |  |    | 0.058                | -0.444 | 0.561  |
| Sub-total     |  |    |                      |        |        |
| D+L pooled ES |  |    | 0.134                | -0.334 | 0.603  |
| -----+-----   |  |    |                      |        |        |
| 4 - 1         |  |    |                      |        |        |
| 20            |  |    | -0.262               | -0.782 | 0.259  |

|               |  |        |        |       |
|---------------|--|--------|--------|-------|
| Sub-total     |  |        |        |       |
| D+L pooled ES |  | -0.262 | -0.782 | 0.259 |

**Low and middle income**

| Study         |  | ES     | [95% Conf. Interval] |        |
|---------------|--|--------|----------------------|--------|
| -----+-----   |  |        |                      |        |
| 5 - 1         |  |        |                      |        |
| 0             |  | -1.651 | -2.510               | -0.792 |
| 1             |  | -1.810 | -2.283               | -1.337 |
| 18            |  | -0.616 | -1.219               | -0.014 |
| Sub-total     |  |        |                      |        |
| D+L pooled ES |  | -1.355 | -2.154               | -0.556 |
| -----+-----   |  |        |                      |        |
| 8 - 1         |  |        |                      |        |
| 21            |  | -4.915 | -6.482               | -3.348 |
| Sub-total     |  |        |                      |        |
| D+L pooled ES |  | -4.915 | -6.482               | -3.348 |
| -----+-----   |  |        |                      |        |
| 4 - 2         |  |        |                      |        |
| 9             |  | -0.190 | -0.951               | 0.570  |
| Sub-total     |  |        |                      |        |
| D+L pooled ES |  | -0.190 | -0.951               | 0.570  |
| -----+-----   |  |        |                      |        |
| 7 - 2         |  |        |                      |        |
| 9             |  | -0.127 | -0.912               | 0.658  |
| Sub-total     |  |        |                      |        |
| D+L pooled ES |  | -0.127 | -0.912               | 0.658  |
| -----+-----   |  |        |                      |        |
| 7 - 4         |  |        |                      |        |
| 9             |  | 0.063  | -0.679               | 0.806  |
| Sub-total     |  |        |                      |        |
| D+L pooled ES |  | 0.063  | -0.679               | 0.806  |
| -----+-----   |  |        |                      |        |
| 3 - 2         |  |        |                      |        |
| 22            |  | -0.563 | -0.725               | -0.401 |
| Sub-total     |  |        |                      |        |
| D+L pooled ES |  | -0.563 | -0.725               | -0.401 |

**Test(s) of heterogeneity:****High income**

|       | Heterogeneity statistic | degrees of freedom | P     | I-squared** | Tau-squared |
|-------|-------------------------|--------------------|-------|-------------|-------------|
| 8 - 1 | 8.52                    | 2                  | 0.014 | 76.5%       | 0.5004      |
| 8 - 6 | 0.00                    | 0                  | .     | .%          | 0.0000      |
| 6 - 4 | 0.00                    | 0                  | .     | .%          | 0.0000      |
| 8 - 2 | 2.71                    | 2                  | 0.257 | 26.3%       | 0.0963      |
| 4 - 2 | 0.00                    | 0                  | .     | .%          | 0.0000      |
| 6 - 5 | 0.67                    | 1                  | 0.412 | 0.0%        | 0.0000      |
| 4 - 1 | 0.00                    | 0                  | .     | .%          | 0.0000      |

\*\* I-squared: the variation in ES attributable to heterogeneity)

**Low and middle income**

|       | Heterogeneity statistic | degrees of freedom | P     | I-squared** | Tau-squared |
|-------|-------------------------|--------------------|-------|-------------|-------------|
| 5 - 1 | 9.72                    | 2                  | 0.008 | 79.4%       | 0.3900      |
| 8 - 1 | 0.00                    | 0                  | .     | .%          | 0.0000      |
| 4 - 2 | 0.00                    | 0                  | .     | .%          | 0.0000      |
| 7 - 2 | 0.00                    | 0                  | .     | .%          | 0.0000      |

```

7 - 4          0.00          0          .          .%          0.0000
3 - 2          0.00          0          .          .%          0.0000
** I-squared: the variation in ES attributable to heterogeneity)

```

### **Evaluation of heterogeneity and incoherence**

#### **High income**

Overall heterogeneity in the inconsistency model  
 Estimated between-studies SD: .565

Overall heterogeneity in the consistency model  
 Estimated between-studies SD: .556

Overall incoherence  
 Design-by-treatment test: P=0.48

#### **Low and middle income**

\*\*\* NO INCONSISTENCY MODEL (no pair for which direct and indirect comparison available at the same time): Consistency by definition \*\*\*

Overall heterogeneity in the consistency model (only first network: in the second one only 1 study per comparison)

Estimated between-studies SD: 0.589

#### Loop-specific heterogeneity

#### **High income**

\* 3 quadratic loops found

Evaluation of inconsistency using loop-specific heterogeneity estimates:

|  | Loop            | IF    | seIF  | z_value | p_value | CI_95       | Loop_Heterog_tau2 |
|--|-----------------|-------|-------|---------|---------|-------------|-------------------|
|  | TAU-NET-SSM-CBT | 1.387 | 0.869 | 1.596   | 0.111   | (0.00,3.09) | 0.096             |
|  | WL-TAU-NET-CBT  | 1.040 | 1.328 | 0.783   | 0.434   | (0.00,3.64) | 0.354             |
|  | WL-NET-SSM-CBT  | 0.344 | 1.917 | 0.180   | 0.857   | (0.00,4.10) | 0.500             |

#### Consistency between direct and indirect estimates

| Side  | Direct<br>Coef. | Std. Err. | Indirect<br>Coef. | Std. Err. | Difference<br>Coef. | Std. Err. | P> z  | tau      |
|-------|-----------------|-----------|-------------------|-----------|---------------------|-----------|-------|----------|
| 1 4   | -.2615775       | .6616629  | .2287839          | .7842028  | -.4903614           | 1.026047  | 0.633 | .6061152 |
| 1 8   | -.3780476       | .4630631  | -.8684237         | .9111245  | .4903761            | 1.026025  | 0.633 | .6061108 |
| 2 4   | -.5657008       | .4019662  | -1.909911         | .5975204  | 1.344211            | .7201441  | 0.062 | .2835597 |
| 2 8   | -1.780997       | .3516614  | -.4367711         | .5914288  | -1.344226           | .7202088  | 0.062 | .2835516 |
| 4 6   | .2443543        | .755458   | -.5522057         | .8620386  | .79656              | 1.146223  | 0.487 | .6147942 |
| 5 6 * | .2529045        | .501955   | -.5384438         | .447.2606 | .7913483            | .447.261  | 0.999 | .5556975 |
| 6 8   | -.0667675       | .6401132  | -.8633355         | .9508289  | .7965679            | 1.14622   | 0.487 | .6147947 |

**\* Warning: all the evidence about these contrasts comes from the trials which directly compare them.**

#### **Low and middle income**

\*\*\* NO EVALUATION OF INCONSISTENCY (no pair for which direct and indirect comparison available at the same time): Consistency by definition \*\*\*

#### **SUCRA and cumulative probability plots**

**High income**

| Treatm~t | SUCRA | PrBest | MeanRank |
|----------|-------|--------|----------|
| WL       | 45.4  | 5.4    | 3.7      |
| TAU      | 1.8   | 0.0    | 5.9      |
| NET      | 48.9  | 8.0    | 3.6      |
| EMDR     | 70.1  | 41.0   | 2.5      |
| SSM      | 54.8  | 7.1    | 3.3      |
| CBT      | 79.1  | 38.6   | 2.0      |

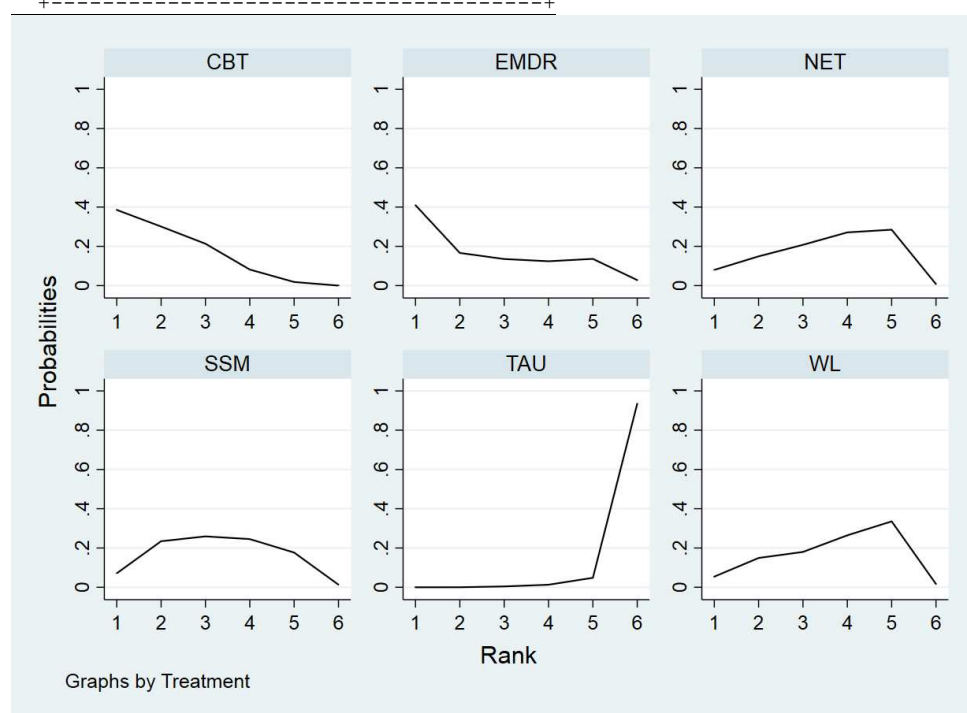**Low and middle income - Network 1**

| Treatm~t | SUCRA | PrBest | MeanRank |
|----------|-------|--------|----------|
| WL       | 0.0   | 0.0    | 3.0      |
| EMDR     | 50.0  | 0.0    | 2.0      |
| CBT      | 100.0 | 100.0  | 1.0      |

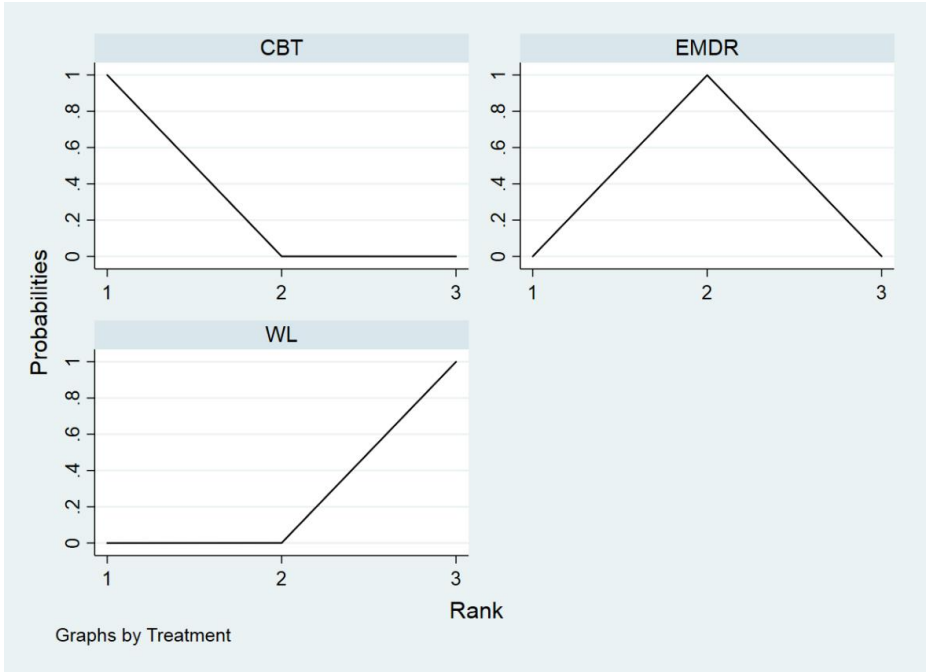

Low and middle income – Network 2

| Treatm~t | SUCRA | PrBest | MeanRank |
|----------|-------|--------|----------|
| TAU      | 22.9  | 0.0    | 3.3      |
| SH+      | 89.2  | 74.1   | 1.3      |
| NET      | 47.4  | 14.0   | 2.6      |
| SC       | 40.5  | 11.9   | 2.8      |

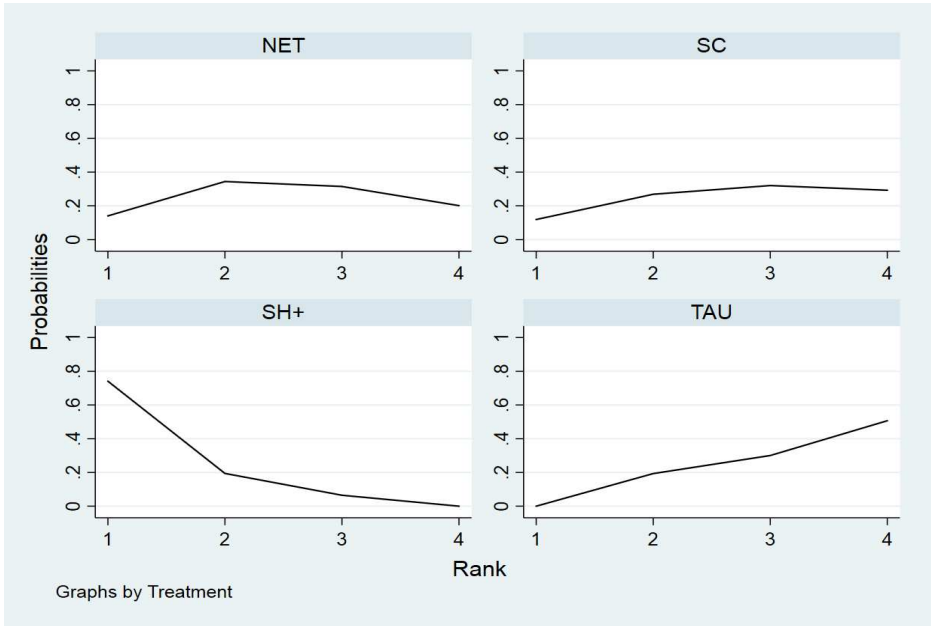

Subgroup analysis: by level of intervention (individual vs. group intervention)

Intervention codes:

|                                 |   |
|---------------------------------|---|
| Waiting List                    | 1 |
| Treatment as Usual              | 2 |
| Self-Help Plus                  | 3 |
| Narrative Exposure Therapy      | 4 |
| EMDR                            | 5 |
| Stabilization/Stress Management | 6 |
| Supportive Counseling           | 7 |
| Cognitive- Behavioural Therapy  | 8 |

Studies contributing to the analysis

- Individual level n=14
- Group level n=4

Network map  
Individual level

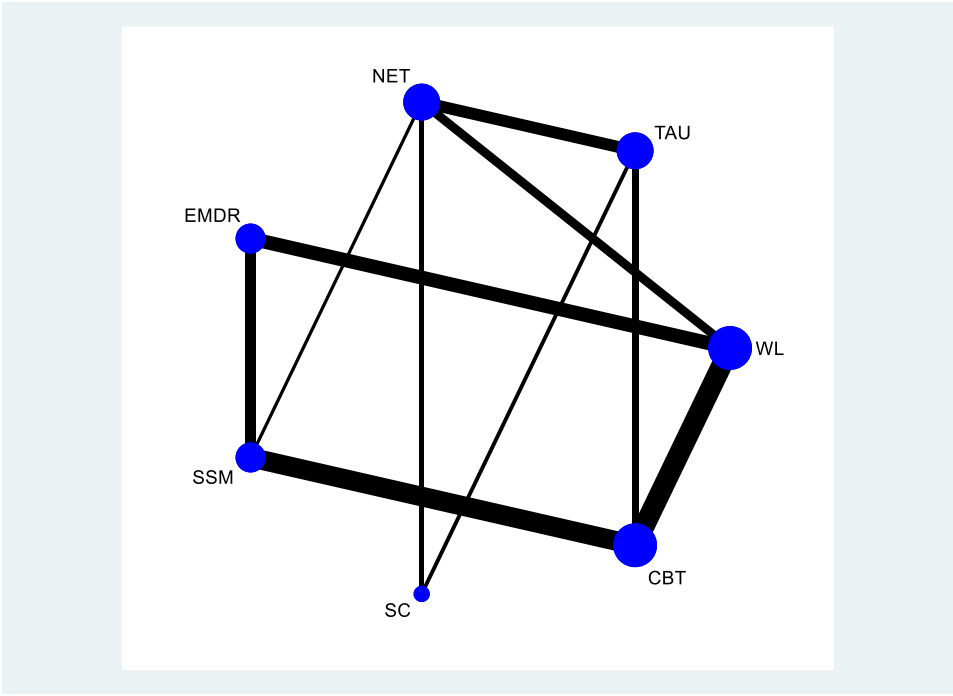

Group level

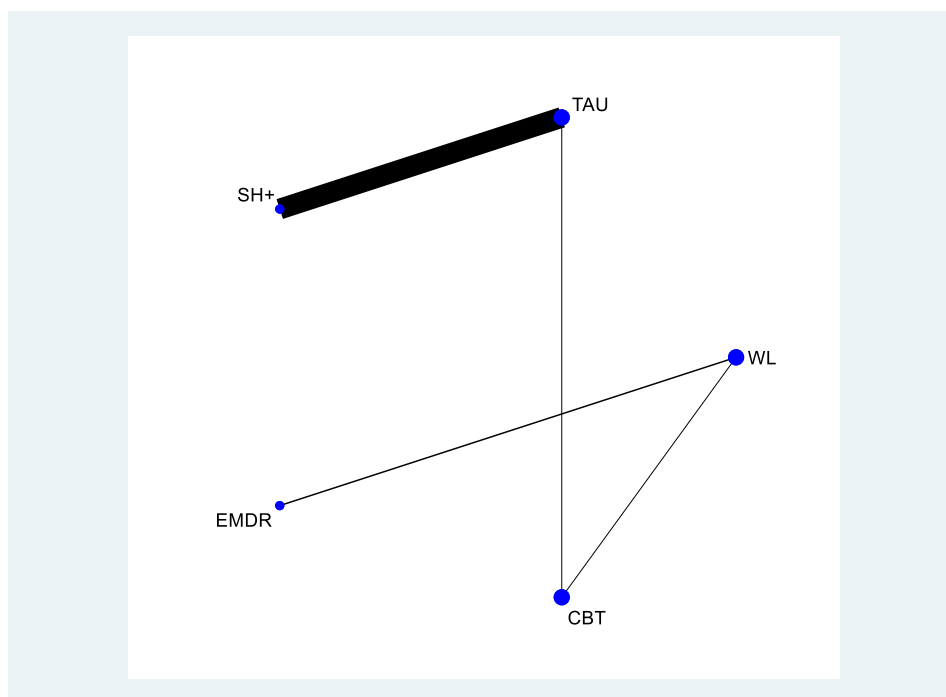Net league tableIndividual level

| CBT                        | -0.63 (-1.64,0.37)         | 0.65 (-0.31,1.60)  | 1.03 (-0.48,2.53)  | 0.06 (-0.87,0.98)          | 1.49 (0.59,2.38)  | 0.74 (-0.01,1.49)  |
|----------------------------|----------------------------|--------------------|--------------------|----------------------------|-------------------|--------------------|
| 0.63 (-0.37,1.64)          | EMDR                       | 1.28 (0.15,2.40)   | 1.66 (-0.01,3.32)  | 0.69 (-0.20,1.58)          | 2.12 (0.91,3.33)  | 1.37 (0.52,2.22)   |
| -0.65 (-1.60,0.31)         | <b>-1.28 (-2.40,-0.15)</b> | NET                | 0.38 (-0.95,1.71)  | -0.59 (-1.61,0.43)         | 0.84 (-0.01,1.69) | 0.10 (-0.84,1.03)  |
| -1.03 (-2.53,0.48)         | -1.66 (-3.32,0.01)         | -0.38 (-1.71,0.95) | SC                 | -0.97 (-2.57,0.63)         | 0.46 (-0.87,1.80) | -0.28 (-1.82,1.26) |
| -0.06 (-0.98,0.87)         | -0.69 (-1.58,0.20)         | 0.59 (-0.43,1.61)  | 0.97 (-0.63,2.57)  | SSM                        | 1.43 (0.30,2.55)  | 0.68 (-0.26,1.62)  |
| <b>-1.49 (-2.38,-0.59)</b> | <b>-2.12 (-3.33,-0.91)</b> | -0.84 (-1.69,0.01) | -0.46 (-1.80,0.87) | <b>-1.43 (-2.55,-0.30)</b> | TAU               | -0.75 (-1.77,0.28) |
| -0.74 (-1.49,0.01)         | <b>-1.37 (-2.22,-0.52)</b> | -0.10 (-1.03,0.84) | 0.28 (-1.26,1.82)  | -0.68 (-1.62,0.26)         | 0.75 (-0.28,1.77) | WL                 |

Group level

| CBT                        | 4.30 (2.62,5.98)           | 0.26 (-1.08,1.61)          | 0.83 (-0.51,2.16)          | 4.91 (3.35,6.48) |
|----------------------------|----------------------------|----------------------------|----------------------------|------------------|
| <b>-4.30 (-5.98,-2.62)</b> | EMDR                       | -4.04 (-6.19,-1.88)        | -3.47 (-5.62,-1.33)        | 0.62 (0.01,1.22) |
| -0.26 (-1.61,1.08)         | 4.04 (1.88,6.19)           | SHplus                     | 0.56 (0.40,0.72)           | 4.65 (2.59,6.72) |
| -0.83 (-2.16,0.51)         | 3.47 (1.33,5.62)           | <b>-0.56 (-0.72,-0.40)</b> | TAU                        | 4.09 (2.03,6.15) |
| <b>-4.91 (-6.48,-3.35)</b> | <b>-0.62 (-1.22,-0.01)</b> | <b>-4.65 (-6.72,-2.59)</b> | <b>-4.09 (-6.15,-2.03)</b> | WL               |

Interval PlotIndividual level

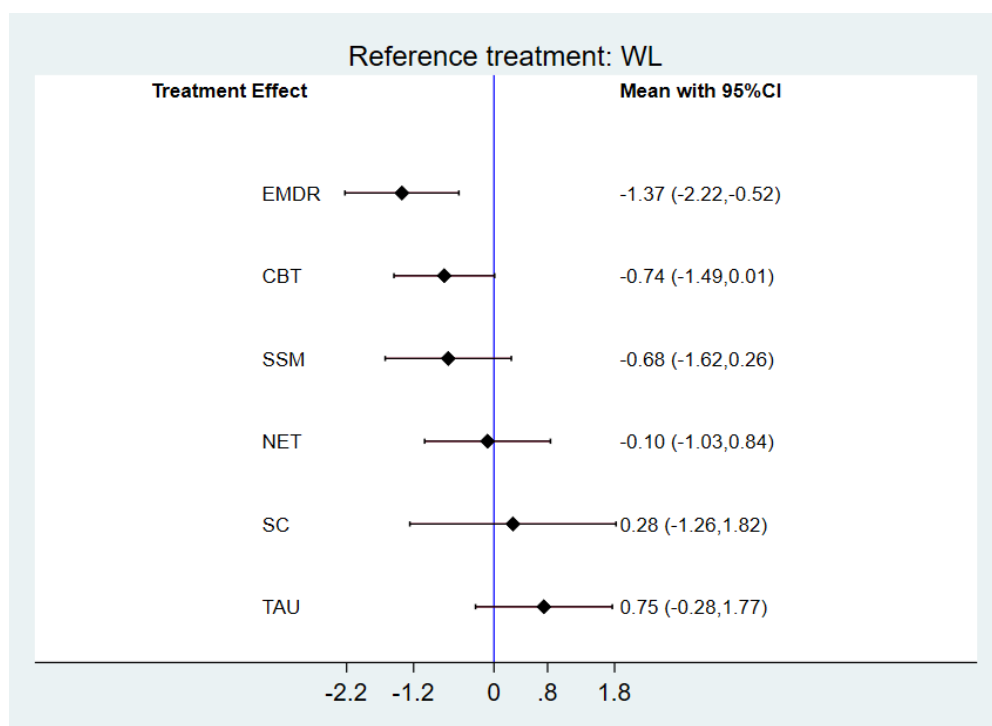Group level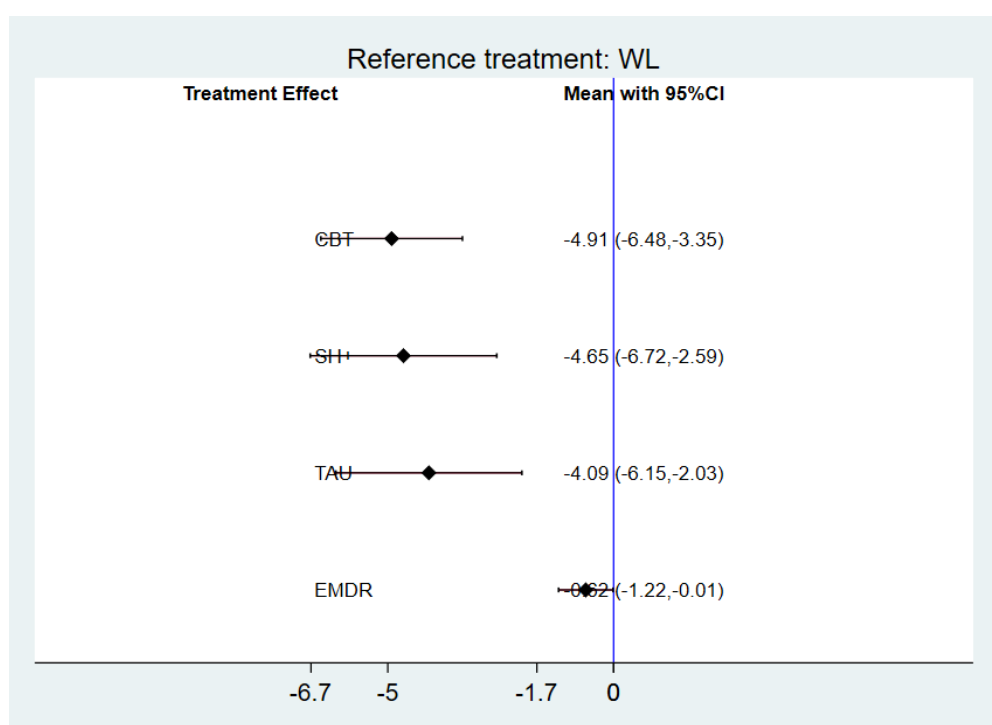



**Pairwise meta-analysis****Individual level**

| Study         | ES     | [95% Conf. Interval] |        |
|---------------|--------|----------------------|--------|
| -----+-----   |        |                      |        |
| 5 - 1         |        |                      |        |
| 0             | -1.651 | -2.510               | -0.792 |
| 1             | -1.810 | -2.283               | -1.337 |
| Sub-total     |        |                      |        |
| D+L pooled ES | -1.773 | -2.187               | -1.359 |
| -----+-----   |        |                      |        |
| 8 - 1         |        |                      |        |
| 3             | 0.162  | -0.231               | 0.555  |
| 6             | -2.213 | -3.768               | -0.658 |
| 19            | -0.111 | -0.871               | 0.649  |
| Sub-total     |        |                      |        |
| D+L pooled ES | -0.428 | -1.377               | 0.520  |
| -----+-----   |        |                      |        |
| 8 - 6         |        |                      |        |
| 4             | -0.067 | -0.416               | 0.283  |
| Sub-total     |        |                      |        |
| D+L pooled ES | -0.067 | -0.416               | 0.283  |
| -----+-----   |        |                      |        |
| 6 - 4         |        |                      |        |
| 5             | 0.244  | -0.616               | 1.105  |
| Sub-total     |        |                      |        |
| D+L pooled ES | 0.244  | -0.616               | 1.105  |
| -----+-----   |        |                      |        |
| 8 - 2         |        |                      |        |
| 7             | -2.121 | -2.915               | -1.328 |
| 8             | -1.904 | -2.905               | -0.903 |
| Sub-total     |        |                      |        |
| D+L pooled ES | -2.038 | -2.659               | -1.416 |
| -----+-----   |        |                      |        |
| 4 - 2         |        |                      |        |
| 9             | -0.190 | -0.951               | 0.570  |
| 14            | -0.566 | -1.124               | -0.007 |
| Sub-total     |        |                      |        |
| D+L pooled ES | -0.434 | -0.884               | 0.016  |
| -----+-----   |        |                      |        |
| 7 - 2         |        |                      |        |
| 9             | -0.127 | -0.912               | 0.658  |
| Sub-total     |        |                      |        |
| D+L pooled ES | -0.127 | -0.912               | 0.658  |
| -----+-----   |        |                      |        |
| 7 - 4         |        |                      |        |
| 9             | 0.063  | -0.679               | 0.806  |
| Sub-total     |        |                      |        |
| D+L pooled ES | 0.063  | -0.679               | 0.806  |
| -----+-----   |        |                      |        |
| 6 - 5         |        |                      |        |
| 15            | 0.641  | -0.657               | 1.940  |
| 16            | 0.058  | -0.444               | 0.561  |
| Sub-total     |        |                      |        |
| D+L pooled ES | 0.134  | -0.334               | 0.603  |
| -----+-----   |        |                      |        |
| 4 - 1         |        |                      |        |
| 20            | -0.262 | -0.782               | 0.259  |
| Sub-total     |        |                      |        |
| D+L pooled ES | -0.262 | -0.782               | 0.259  |
| -----+-----   |        |                      |        |

**Group level**

| Study         | ES     | [95% Conf. Interval] |        |
|---------------|--------|----------------------|--------|
| -----+-----   |        |                      |        |
| 5 - 1         |        |                      |        |
| 18            | -0.616 | -1.219               | -0.014 |
| Sub-total     |        |                      |        |
| D+L pooled ES | -0.616 | -1.219               | -0.014 |
| -----+-----   |        |                      |        |

|               |  |        |        |        |
|---------------|--|--------|--------|--------|
| 8 - 1         |  |        |        |        |
| 21            |  | -4.915 | -6.482 | -3.348 |
| Sub-total     |  |        |        |        |
| D+L pooled ES |  | -4.915 | -6.482 | -3.348 |
| -----         |  |        |        |        |
| 8 - 2         |  |        |        |        |
| 12            |  | -0.825 | -2.161 | 0.511  |
| Sub-total     |  |        |        |        |
| D+L pooled ES |  | -0.825 | -2.161 | 0.511  |
| -----         |  |        |        |        |
| 3 - 2         |  |        |        |        |
| 22            |  | -0.563 | -0.725 | -0.401 |
| Sub-total     |  |        |        |        |
| D+L pooled ES |  | -0.563 | -0.725 | -0.401 |
| -----         |  |        |        |        |

Test(s) of heterogeneity:

Individual level

|       | Heterogeneity | degrees of |       |             |             |
|-------|---------------|------------|-------|-------------|-------------|
|       | statistic     | freedom    | P     | I-squared** | Tau-squared |
| 5 - 1 | 0.10          | 1          | 0.750 | 0.0%        | 0.0000      |
| 8 - 1 | 8.52          | 2          | 0.014 | 76.5%       | 0.5004      |
| 8 - 6 | 0.00          | 0          | .     | .%          | 0.0000      |
| 6 - 4 | 0.00          | 0          | .     | .%          | 0.0000      |
| 8 - 2 | 0.11          | 1          | 0.739 | 0.0%        | 0.0000      |
| 4 - 2 | 0.61          | 1          | 0.436 | 0.0%        | 0.0000      |
| 7 - 2 | 0.00          | 0          | .     | .%          | 0.0000      |
| 7 - 4 | 0.00          | 0          | .     | .%          | 0.0000      |
| 6 - 5 | 0.67          | 1          | 0.412 | 0.0%        | 0.0000      |
| 4 - 1 | 0.00          | 0          | .     | .%          | 0.0000      |

\*\* I-squared: the variation in ES attributable to heterogeneity)

Group level

\*\*\*\*\* NO TEST OF HETEROGENEITY (1 study per each comparison): Fixed effects\*\*\*\*\*

### Evaluation of heterogeneity and incoherence

Individual level

Overall heterogeneity in the inconsistency model  
Estimated between-studies SDs: .211

Overall heterogeneity in the consistency model  
Estimated between-studies SDs:.632

Overall incoherence  
Design-by-treatment test:  $P=0.0123$

Overall incoherence in the fixed-effect model  
Design-by-treatment test: P=0.0000

Individual level

### Loop-specific heterogeneity

```
* 1 triangular loops found
```

```
* 1 triangular loops found
* 5 quadratic loops found
```

Note: Heterogeneity of loop TAU-NET-SC cannot be estimated due to insufficient observations - set equal to 0

Evaluation of inconsistency using loop-specific heterogeneity estimates:

|                   | 1 | 9 | 1 | 1 | 9 | 1 |
|-------------------|---|---|---|---|---|---|
| Loop              |   |   |   |   |   |   |
| IF                |   |   |   |   |   |   |
| seIF              |   |   |   |   |   |   |
| z value           |   |   |   |   |   |   |
| p value           |   |   |   |   |   |   |
| CI 95             |   |   |   |   |   |   |
| Loop Heterog tau2 |   |   |   |   |   |   |

|                 |       |       |       |       |             |       |
|-----------------|-------|-------|-------|-------|-------------|-------|
| TAU-NET-SSM-CBT | 1.781 | 0.615 | 2.897 | 0.004 | (0.58,2.99) | 0.000 |
| WL-NET-EMDR-SSM | 1.622 | 0.604 | 2.684 | 0.007 | (0.44,2.81) | 0.000 |
| WL-TAU-NET-CBT  | 1.609 | 1.032 | 1.559 | 0.119 | (0.00,3.63) | 0.199 |
| WL-EMDR-SSM-CBT | 1.291 | 1.017 | 1.269 | 0.205 | (0.00,3.28) | 0.212 |
| TAU-NET-SC      | 0.375 | 0.621 | 0.605 | 0.545 | (0.00,1.59) | 0.000 |
| WL-NET-SSM-CBT  | 0.344 | 1.917 | 0.180 | 0.857 | (0.00,4.10) | 0.500 |

Consistency between direct and indirect estimates

| Side  | Direct           |                 | Indirect         |                 | Difference       |                 | tau          |                 |
|-------|------------------|-----------------|------------------|-----------------|------------------|-----------------|--------------|-----------------|
|       | Coef.            | Std. Err.       | Coef.            | Std. Err.       | Coef.            | Std. Err.       | P> z         |                 |
| 1 4   | -.2615775        | .7301872        | .0466128         | .7071073        | -.3081903        | 1.016452        | 0.762        | .6802581        |
| 1 5   | -1.743445        | .4504276        | -.3641775        | .7413026        | -1.379268        | .867996         | 0.112        | .5397135        |
| 1 8   | -.2961198        | .3916849        | -1.612747        | .5653823        | 1.316628         | .6800046        | 0.053        | .4698039        |
| 2 4 * | -.3963677        | .4194096        | -2.109128        | .7049359        | 1.71276          | .8198214        | 0.037        | .4890404        |
| 2 7 * | -.1269141        | .7418093        | -2.104679        | 1.648857        | 1.977765         | 1.811842        | 0.275        | .6243313        |
| 2 8   | <b>-2.024472</b> | <b>.4723947</b> | <b>-.3117029</b> | <b>.6698678</b> | <b>-1.712769</b> | <b>.8198209</b> | <b>0.037</b> | <b>.4890404</b> |
| 4 6   | .2443541         | .7287894        | -1.279077        | .6632932        | 1.523431         | .9854399        | 0.122        | .5817122        |
| 4 7 * | .0634569         | .7303677        | 2.041215         | 1.664108        | -1.977758        | 1.811841        | 0.275        | .6243304        |
| 5 6   | .2497831         | .4916354        | 1.629049         | .7133685        | -1.379266        | .8680002        | 0.112        | .539715         |
| 6 8   | -.0667676        | .716208         | -.0845914        | .7236926        | .0178238         | 1.018177        | 0.986        | .6936724        |

\* Warning: all the evidence about these contrasts comes from the trials which directly compare them.

#### Group level

\*\*\* NO EVALUATION OF INCONSISTENCY (no pair for which direct and indirect comparison available at the same time: no loop) \*\*\*

#### Individual level

#### SUCRA and cumulative probability plots

| Treatm~t | SUCRA | PrBest | MeanRank |
|----------|-------|--------|----------|
| WL       | 34.9  | 0.0    | 4.9      |
| TAU      | 6.0   | 0.0    | 6.6      |
| NET      | 41.4  | 0.6    | 4.5      |
| EMDR     | 96.4  | 83.5   | 1.2      |
| SSM      | 69.9  | 4.6    | 2.8      |
| SC       | 27.0  | 2.1    | 5.4      |
| CBT      | 74.3  | 9.3    | 2.5      |

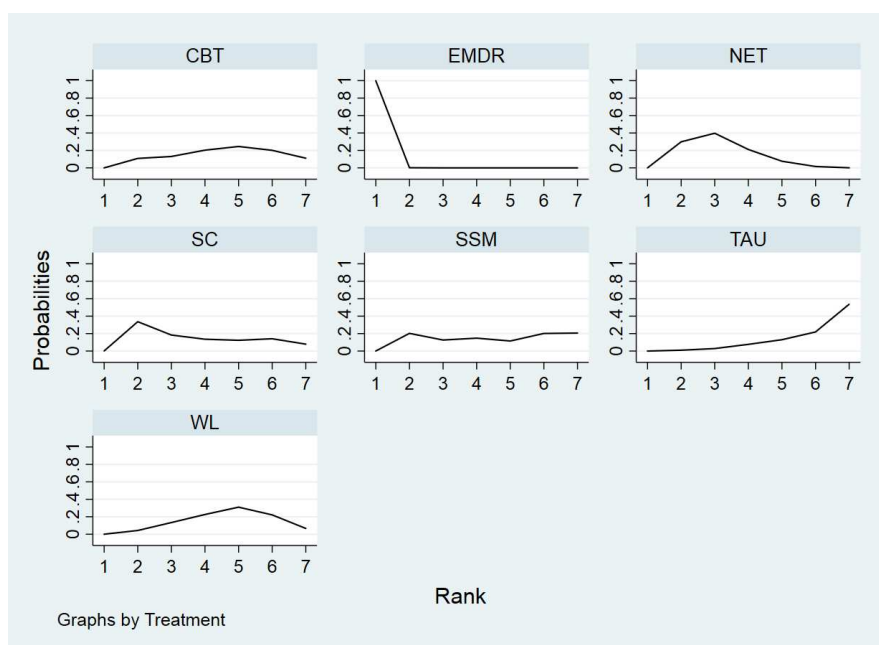

### Group level

### SUCRA and cumulative probability plots

| Treatm~t | SUCRA | PrBest | MeanRank |
|----------|-------|--------|----------|
| WL       | 0.6   | 0.0    | 5.0      |
| TAU      | 52.9  | 0.0    | 2.9      |
| SH+      | 83.7  | 34.8   | 1.7      |
| EMDR     | 24.5  | 0.0    | 4.0      |
| CBT      | 88.4  | 65.2   | 1.5      |

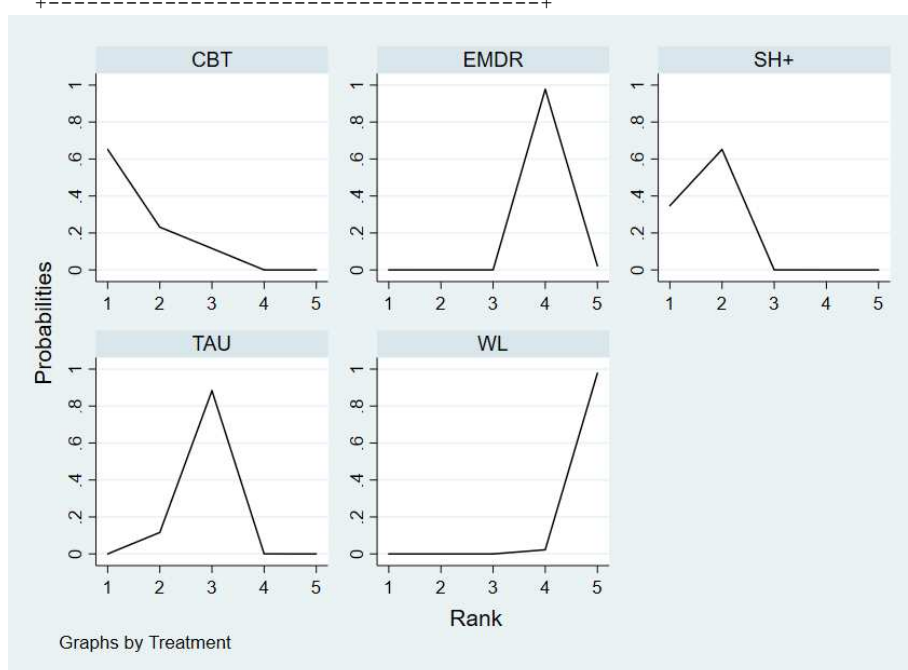

## Transitivity assessment

|                                  | P-value of the association with outcome in meta-regression | P-value of the association with intervention* |
|----------------------------------|------------------------------------------------------------|-----------------------------------------------|
| Percentage of women              | <0.001                                                     | 0.317                                         |
| Mean age                         | <0.001                                                     | 0.271                                         |
| Number of sessions               | 0.526                                                      | 0.102                                         |
| Number of randomized individuals | 0.634                                                      | 0.788                                         |
| Income level                     | <0.001                                                     | <0.001                                        |

\*The Kruskal-Wallis test was performed for continuous variables, while Fisher's exact test for country's income level (lower and middle vs high)

The only variable showing evidence of association with both outcome and intervention is income level, a variable that we used to perform subgroup analyses.

## BOXPLOT

### Percentage of women

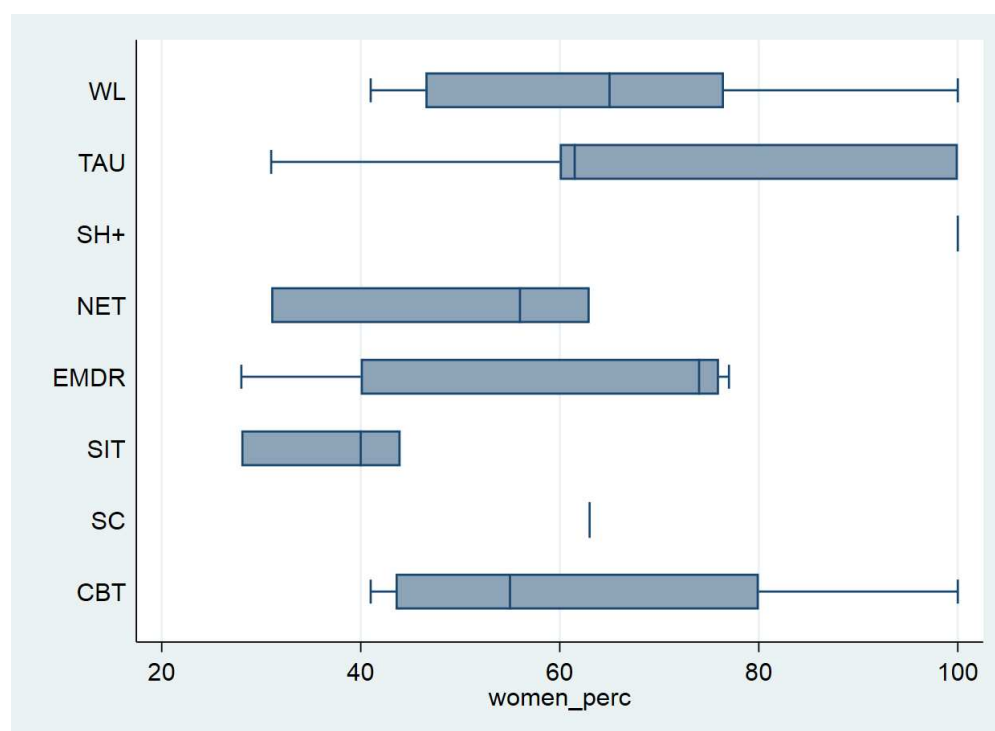

Mean age

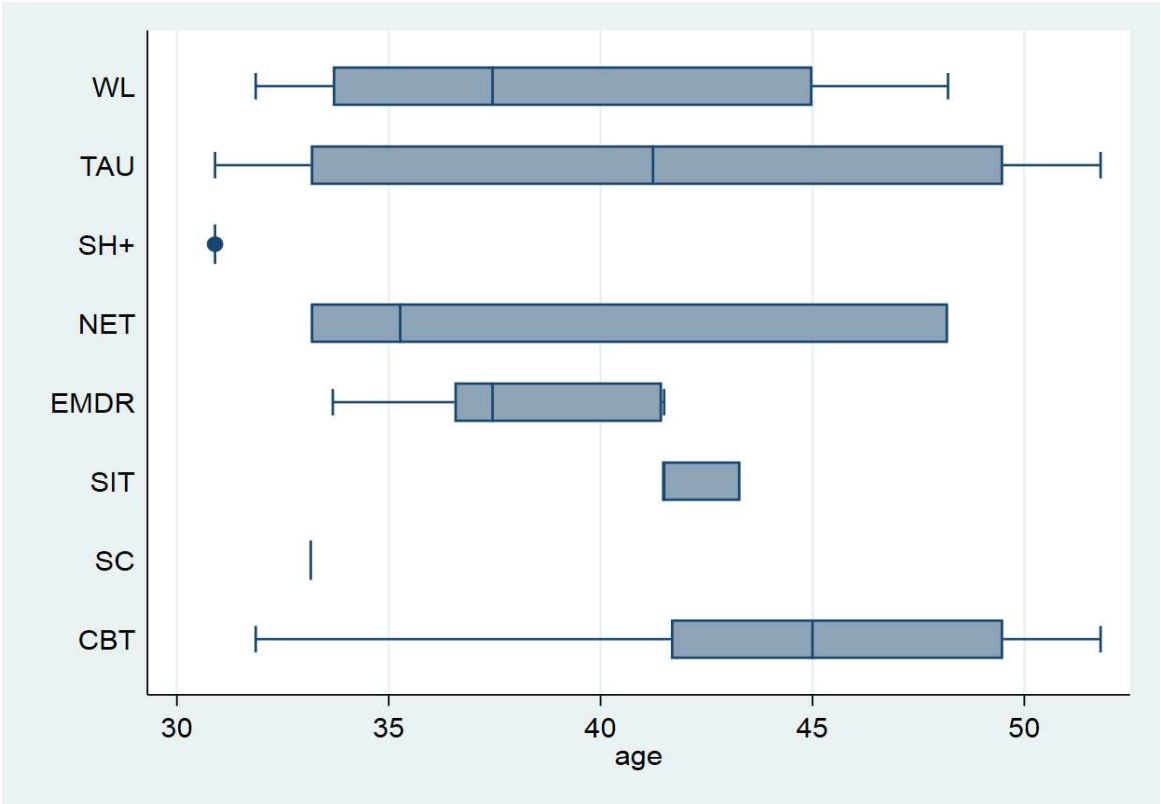

Number of sessions

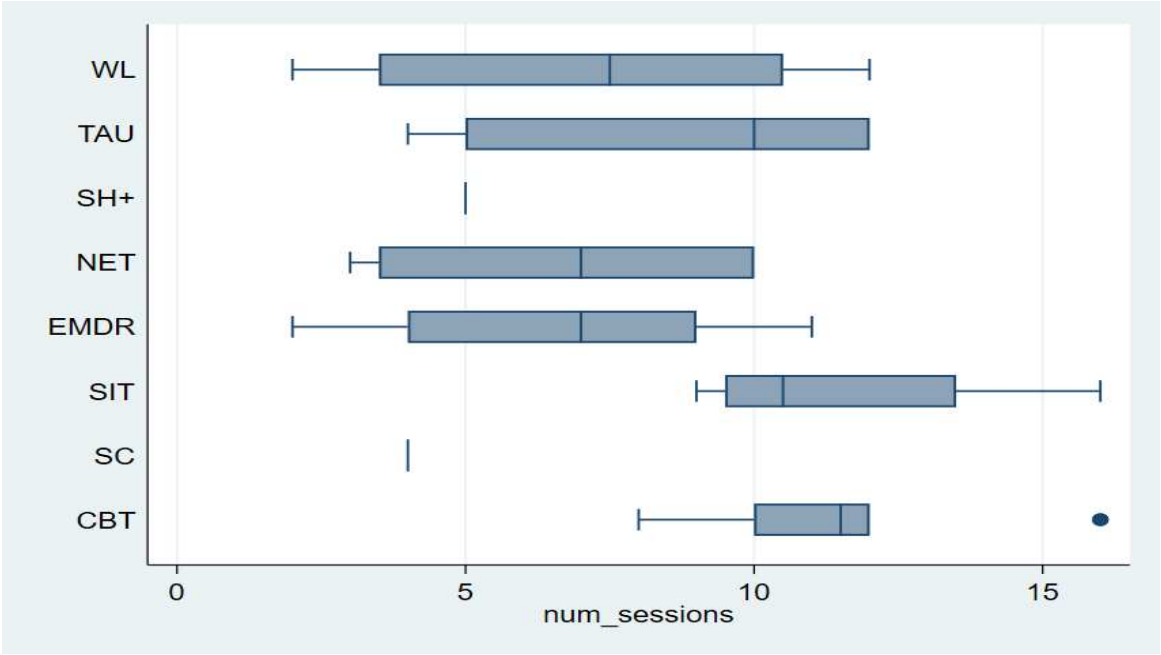

Number of randomized individuals

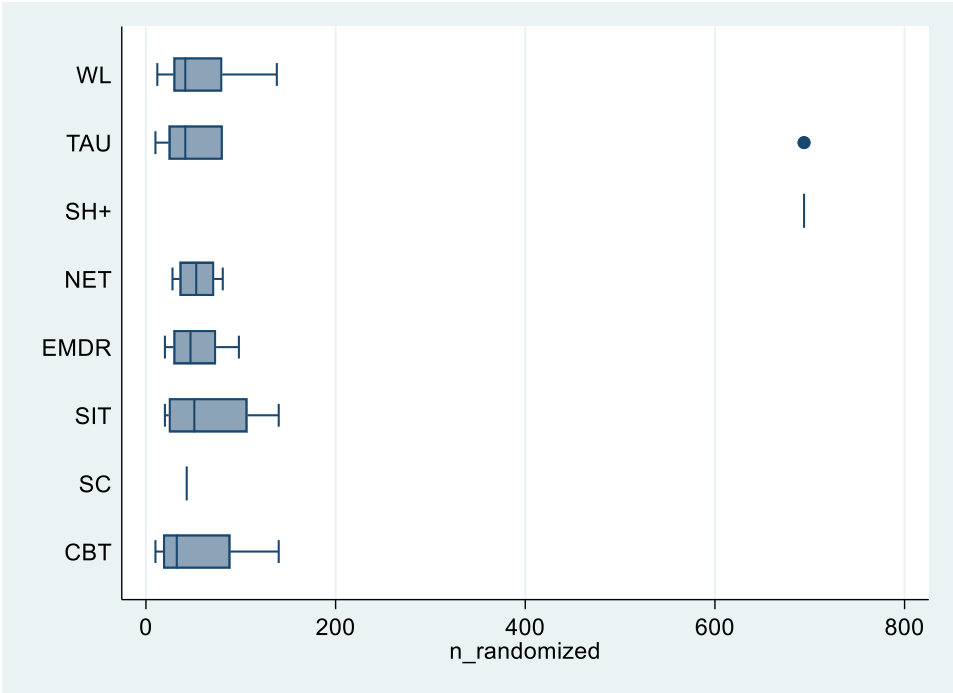

Percentage of LMIC by treatment

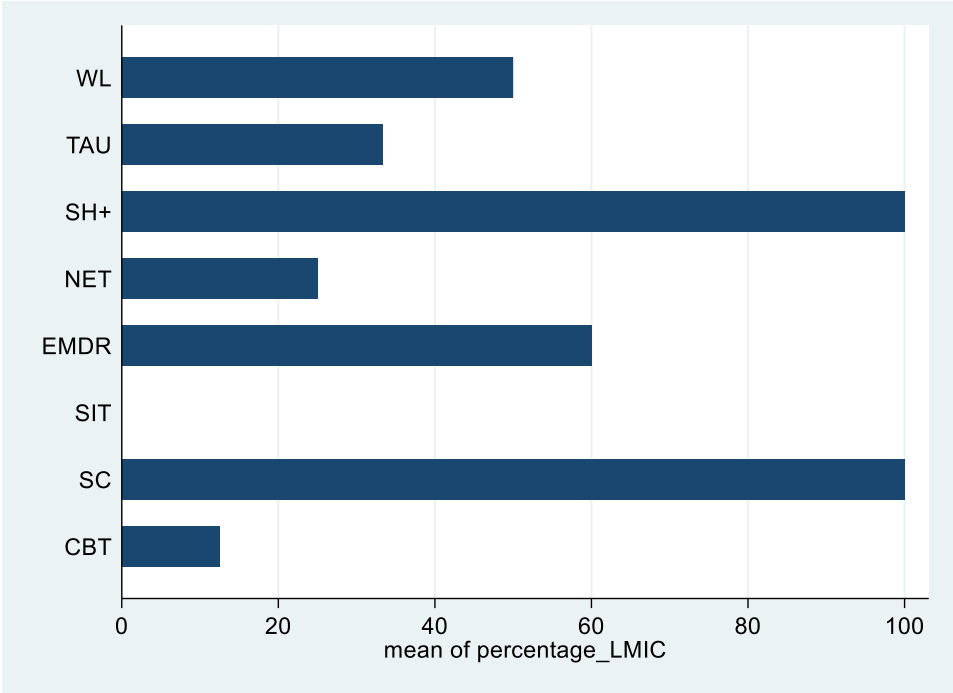

Supplement: bmjgh-2021-005029supp001_data_supplement.pdf [file bmjgh-2021-005029supp001_data_supplement.pdf]
